# Supplementary material for: Molecular pathways in patients with systemic lupus erythematosus revealed by gene-centred DNA sequencing
Source: HighWire-hosted journal article supplement (doi:10.1136/annrheumdis-2020-218636), 2020-10-09
Supplement: annrheumdis-2020-218636supp002_data_supplement.pdf [file annrheumdis-2020-218636supp002_data_supplement.pdf]

**Supplementary Table S1a.** Patient characteristics Scandinavian SLE cohorts.

|                                                           | Sweden      | Norway      | Denmark     | P†        | P <sub>bonferroni</sub> ‡ |
|-----------------------------------------------------------|-------------|-------------|-------------|-----------|---------------------------|
| Number of patients                                        | 958         | 289         | 547         |           |                           |
| Female                                                    | 826 (86.2%) | 258 (89.3%) | 484 (89.6%) | 0.036     | 0.54                      |
| Age at diagnosis                                          | 36 (3-85)   | 32 (9-73)   | 33 (3-80)   | 9.5E-07   | 1.4E-05                   |
| Age at follow-up                                          | 52 (18-94)  | 52 (23-90)  | 47 (18-80)  | 8.4E-06   | 0.00013                   |
| Deceased (all causes)*                                    | 74 (7.7%)   | -           | -           | -         | -                         |
| Deceased age                                              | 68 (27-91)  | -           | -           | -         | -                         |
| ≥4 ACR criteria (Tan et al., 1982; Hochberg et al., 1997) | 958 (100%)  | 289 (100%)  | 547 (100%)  | 1         | 1                         |
| Number of ACR criteria fulfilled                          | 5.7 (4-10)  | 5.9 (4-9)   | 5.9 (4-11)  | 0.00094   | 0.014                     |
| ACR criteria:                                             |             |             |             |           |                           |
| 1) Malar rash                                             | 543 (56.7%) | 171 (59.4%) | 323 (59.0%) | 0.29      | 1                         |
| 2) Discoid rash                                           | 235 (24.5%) | 36 (12.5%)  | 51 (9.3%)   | 3.9E-15   | 5.9E-14                   |
| 3) Photosensitivity                                       | 648 (67.6%) | 208 (73.5%) | 307 (56.1%) | 0.015     | 0.22                      |
| 4) Oral Ulcers                                            | 241 (25.2%) | 95 (33.8%)  | 160 (29.3%) | 0.0081    | 0.12                      |
| 5) Arthritis                                              | 754 (78.7%) | 224 (77.8%) | 459 (83.9%) | 0.11      | 1                         |
| 6) Serositis                                              | 409 (42.7%) | 113 (39.1%) | 224 (41.0%) | 0.31      | 1                         |
| 7) Renal disorder                                         | 338 (35.3%) | 115 (40.2%) | 239 (43.7%) | 0.0019    | 0.028                     |
| 8) Neurologic disorder                                    | 99 (10.3%)  | 23 (8.0%)   | 65 (11.9%)  | 0.94      | 1                         |
| 9) Hematologic disorder                                   | 615 (64.2%) | 206 (75.2%) | 398 (72.8%) | 2.1E-05   | 3.2E-04                   |
| 10) Immunologic disorder                                  | 653 (68.2%) | 227 (80.8%) | 491 (89.9%) | < 2.2E-16 | 3.3E-15                   |
| 11) Positive ANA                                          | 942 (98.3%) | 288 (100%)  | 537 (98.2%) | 0.44      | 1                         |
| Autoantibodies:                                           |             |             |             |           |                           |
| Anti-DNA                                                  | 449 (61.8%) | -           | -           | -         | -                         |
| Anti-Sm                                                   | 99 (13.6%)  | -           | -           | -         | -                         |
| Anti-RNP                                                  | 188 (26.1%) | -           | -           | -         | -                         |
| Anti-SSA                                                  | 351 (37.3%) | -           | -           | -         | -                         |
| Anti-SSB                                                  | 206 (21.8%) | -           | -           | -         | -                         |
| Anti-cardiolipin IgG                                      | 243 (25.9%) | -           | -           | -         | -                         |
| Anti-beta2-glycoprotein I IgG                             | 179 (19.8%) | -           | -           | -         | -                         |
| Rheumatoid factor (RF)                                    | 130 (23.9%) | -           | -           | -         | -                         |
| Lupus anticoagulant (LAC)                                 | 137 (22.6%) | -           | -           | -         | -                         |
| SLICC Damage Index (Gladman et al., 1996)                 | 2.2 (0-14)  | -           | -           | -         | -                         |

Data are number (%) or mean (range) excluding patients with missing data.

ACR: the American College of Rheumatology

SLICC: The Systemic Lupus Erythematosus International Collaborating Clinics

\*An extended follow-up point was also added for death at which a total of 157 (16.4%) patients were recorded as deceased at an mean age of 68 (27-96) years.

†Categorical variables were compared using a Fisher's exact test and continuous variables by Student's unpaired t-test. The Swedish patients were compared to the combined Norwegian and Danish cohort.

‡Bonferroni corrected P-value, corrected for 15 tests.

**Supplementary Table S1b.** Clinical information on lupus nephritis Swedish SLE cohort.

|                                    | Sweden (number of patients) |
|------------------------------------|-----------------------------|
| Renal disorder                     | 338                         |
| Renal biopsy data                  | 257                         |
| Biopsy confirmed nephritis*        | 245                         |
| Class I-II                         | 33                          |
| Class III-IV                       | 153                         |
| Class V                            | 41                          |
| Other                              | 18                          |
| Dialysis or transplantation (ESRD) | 35                          |

\*Biopsies were classified according to the WHO or the ISN/RPS 2003 classification systems.

ESRD: End-Stage Renal Disease

**Supplementary Table S2.** 35 analysed KEGG pathways and their genes. Each pathway included at least five genes and half or more of genes needed to be included in the targeted sequencing effort. Only sequenced genes are listed.

| Pathway (KEGG ID)                                   | Genes (RefSeq)                                                                                                                                                                                                                                                                                                                                                                                                                                                                                                                                                                                                                                                                                                                                                                                                                                                                                                                                                                                                                                                                                                                                                                                                                                                                                                                                                                                                                                                                                                                                                                                                    |
|-----------------------------------------------------|-------------------------------------------------------------------------------------------------------------------------------------------------------------------------------------------------------------------------------------------------------------------------------------------------------------------------------------------------------------------------------------------------------------------------------------------------------------------------------------------------------------------------------------------------------------------------------------------------------------------------------------------------------------------------------------------------------------------------------------------------------------------------------------------------------------------------------------------------------------------------------------------------------------------------------------------------------------------------------------------------------------------------------------------------------------------------------------------------------------------------------------------------------------------------------------------------------------------------------------------------------------------------------------------------------------------------------------------------------------------------------------------------------------------------------------------------------------------------------------------------------------------------------------------------------------------------------------------------------------------|
| Adherens junction (hsa04520)                        | <i>ACTN1, ACTN4, AFDN, CDC42, CDH1, CREBBP, CTNNA1, CTNNB1, CTNND1, EGFR, EP300, ERBB2, FER, FYN, INSR, IQGAP1, LMO7, MAP3K7, MAPK1, MAPK3, MET, NECTIN2, PTPN1, PTPN6, PTPRM, RAC1, RAC2, RAC3, RHOA, SMAD3, SMAD4, SNAI1, SORBS1, SRC, TCF7, TGFB1, TGFB2, VCL, WAS, WASL, YES1</i>                                                                                                                                                                                                                                                                                                                                                                                                                                                                                                                                                                                                                                                                                                                                                                                                                                                                                                                                                                                                                                                                                                                                                                                                                                                                                                                             |
| Antigen processing and presentation (hsa04612)      | <i>B2M, CALR, CANX, CD4, CD74, CD8A, CD8B, CIITA, CREB1, HLA-A, HLA-B, HLA-C, HLA-DOA, HLA-DOB, HLA-DPA1, HLA-DPB1, HLA-DQA1, HLA-DQA2, HLA-DQB1, HLA-DRA, HLA-DRB1, HLA-DRB5, HLA-E, HSPA6, HSPA8, IFNG, KIR2DL1, KIR2DL3, KLRC1, KLRC2, KLRC3, KLRD1, PDIA3, RFX5, RFXANK, RFXAP, TAP1, TAP2, TAPBP, TNF</i>                                                                                                                                                                                                                                                                                                                                                                                                                                                                                                                                                                                                                                                                                                                                                                                                                                                                                                                                                                                                                                                                                                                                                                                                                                                                                                    |
| Apoptosis - multiple species (hsa04215)             | <i>APAF1, BAK1, BAX, BCL2, BCL2L1, BCL2L11, BID, BIRC2, BIRC3, BIRC6, CASP3, CASP8, CASP9, CYCS, FADD, MAPK10, MAPK8, MAPK9, NGFR, TNFRSF1A</i>                                                                                                                                                                                                                                                                                                                                                                                                                                                                                                                                                                                                                                                                                                                                                                                                                                                                                                                                                                                                                                                                                                                                                                                                                                                                                                                                                                                                                                                                   |
| Apoptosis (hsa04210)                                | <i>AIFM1, AKT1, APAF1, ATM, BAD, BAK1, BAX, BCL2, BCL2A1, BCL2L1, BCL2L11, BID, BIRC2, BIRC3, CAPN1, CAPN2, CASP10, CASP2, CASP3, CASP8, CASP9, CFLAR, CHUK, CSF2RB, CTSH, CTSK, CYCS, DAXX, DDIT3, DFFA, EIF2S1, ENDOG, FADD, FAS, FASLG, FOS, GADD45B, GADD45G, GZMB, HRAS, IKBKB, IKBKG, IL3, ITPR1, JUN, KRAS, MAP2K1, MAP2K2, MAP3K14, MAP3K5, MAPK1, MAPK10, MAPK3, MAPK8, MAPK9, NFKB1, NFKBIA, NGF, NRAS, NTRK1, PARP1, PIK3CA, PIK3CB, PIK3CD, PRF1, RAF1, RELA, RIPK1, TNF, TNFRSF1A, TNFSF10, TP53, TRADD, TRAF1, TRAF2</i>                                                                                                                                                                                                                                                                                                                                                                                                                                                                                                                                                                                                                                                                                                                                                                                                                                                                                                                                                                                                                                                                            |
| B cell receptor signaling pathway (hsa04662)        | <i>AKT1, BCL10, BLNK, BTK, CARD11, CD19, CD22, CD79A, CD79B, CD81, CHUK, CR2, DAPP1, FCGR2B, FOS, GRB2, GSK3B, HRAS, IFITM1, IKBKB, IKBKG, INPP5D, JUN, KRAS, LILRB1, LILRB4, LYN, MALT1, MAP2K1, MAP2K2, MAPK1, MAPK3, NFATC1, NFATC2, NFATC3, NFKB1, NFKBIA, NFKBIB, NRAS, PIK3CA, PIK3CB, PIK3CD, PLCG2, PPP3CA, PPP3CB, PPP3CC, PPP3R1, PPP3R2, PRKCB, PTPN6, RAC1, RAC2, RAC3, RAF1, RASGRP3, RELA, SOS1, SYK, VAV1, VAV2</i>                                                                                                                                                                                                                                                                                                                                                                                                                                                                                                                                                                                                                                                                                                                                                                                                                                                                                                                                                                                                                                                                                                                                                                                |
| Chemokine signaling pathway (hsa04062)              | <i>ADCY2, ADCY3, AKT1, BAD, BRAF, CCL1, CCL11, CCL13, CCL19, CCL2, CCL21, CCL24, CCL25, CCL26, CCL3, CCL3L3, CCL4, CCL5, CCL7, CCR1, CCR10, CCR2, CCR3, CCR4, CCR5, CCR6, CCR7, CCR8, CCR9, CDC42, CHUK, CRK, CRKL, CX3CL1, CX3CR1, CXCL1, CXCL10, CXCL11, CXCL12, CXCL13, CXCL14, CXCL16, CXCL2, CXCL3, CXCL5, CXCL8, CXCL9, CXCR1, CXCR2, CXCR3, CXCR4, CXCR5, CXCR6, ELMO1, FGR, FOXO3, GRB2, GSK3B, HCK, HRAS, IKBKB, IKBKG, ITK, JAK2, JAK3, KRAS, LYN, MAP2K1, MAPK1, MAPK3, NCF1, NFKB1, NFKBIA, NFKBIB, NRAS, PAK1, PF4, PIK3CA, PIK3CB, PIK3CD, PIK3CG, PLCB2, PPBP, PREX1, PRKCB, PRKCD, PRKCZ, PTK2, PTK2B, PXN, RAC1, RAC2, RAC3, RAF1, RELA, RHOA, ROCK1, ROCK2, SHC1, SOS1, SRC, STAT1, STAT2, STAT3, STAT5B, VAV1, VAV2, WAS, WASL, XCR1</i>                                                                                                                                                                                                                                                                                                                                                                                                                                                                                                                                                                                                                                                                                                                                                                                                                                                       |
| Complement and coagulation cascades (hsa04610)      | <i>A2M, C1QA, C1QB, C1QC, C1R, C1S, C2, C3, C3AR1, C4A, C4B, C4BPA, C5, C5AR1, C6, C7, C9, CD46, CD55, CD59, CFB, CFD, CFH, CFI, CR1, CR2, F11, F12, F2, F2R, F8, FGA, FGB, FGG, ITGAM, ITGAX, ITGB2, KLKB1, MASP1, MASP2, MBL2, PLAT, PLAU, PLG, PROS1, SERPINA1, SERPIND1, SERPINE1, SERPING1, VWF</i>                                                                                                                                                                                                                                                                                                                                                                                                                                                                                                                                                                                                                                                                                                                                                                                                                                                                                                                                                                                                                                                                                                                                                                                                                                                                                                          |
| C-type lectin receptor signaling pathway (hsa04625) | <i>AKT1, ARHGEF12, BCL10, BCL3, CARD9, CASP1, CASP8, CBLB, CD209, CHUK, CLEC7A, CYLD, FCER1G, HRAS, IKBKB, IKBKE, IKBKG, IL10, IL12A, IL12B, IL1B, IL2, IL23A, IL6, IRF1, IRF9, ITPR1, JUN, KRAS, LSP1, MALT1, MAP3K14, MAPK1, MAPK10, MAPK11, MAPK12, MAPK13, MAPK14, MAPK3, MAPK8, MAPK9, MAPKAPK2, MDM2, NFATC1, NFATC2, NFATC3, NFATC4, NFKB1, NFKB2, NFKBIA, NLRP3, NRAS, PAK1, PIK3CA, PIK3CB, PIK3CD, PLCG2, PPP3CA, PPP3CB, PPP3CC, PPP3R1, PPP3R2, PRKCD, PTGS2, PTPN11, PYCARD, RAF1, RELA, RELB, RHOA, SRC, STAT1, STAT2, SYK, TNF</i>                                                                                                                                                                                                                                                                                                                                                                                                                                                                                                                                                                                                                                                                                                                                                                                                                                                                                                                                                                                                                                                                 |
| Cytokine-cytokine receptor interaction (hsa04060)   | <i>ACKR3, ACVRI, ACVRI1B, ACVRI2A, ACVRI2B, AMH, AMHR2, BMPRI1A, BMPRI1B, BMPRI2, CCL1, CCL11, CCL13, CCL19, CCL2, CCL21, CCL24, CCL25, CCL26, CCL3, CCL3L3, CCL4, CCL5, CCL7, CCR1, CCR10, CCR2, CCR3, CCR4, CCR5, CCR6, CCR7, CCR8, CCR9, CD27, CD4, CD40, CD40LG, CD70, CLCF1, CNTF, CNTFR, CSF1, CSF1R, CSF2, CSF2RB, CSF3, CSF3R, CTF1, CX3CL1, CX3CR1, CXCL1, CXCL10, CXCL11, CXCL12, CXCL13, CXCL14, CXCL16, CXCL2, CXCL3, CXCL5, CXCL8, CXCL9, CXCR1, CXCR2, CXCR3, CXCR4, CXCR5, CXCR6, EDA, EDA2R, EDAR, EPO, EPOR, FAS, FASLG, GH1, GHR, IFNA1, IFNA10, IFNA13, IFNA14, IFNA16, IFNA17, IFNA2, IFNA21, IFNA4, IFNA5, IFNA6, IFNA7, IFNA8, IFNAR1, IFNAR2, IFNB1, IFNE, IFNG, IFNGR1, IFNGR2, IFNK, IFNL1, IFNLR1, IFNW1, IL10, IL10RA, IL10RB, IL11, IL11RA, IL12A, IL12B, IL12RB1, IL12RB2, IL13, IL13RA1, IL13RA2, IL15, IL15RA, IL17A, IL17B, IL17F, IL17RA, IL17RB, IL17RC, IL18, IL18R1, IL18RAP, IL19, IL1A, IL1B, IL1R1, IL1R2, IL1RAP, IL1RL1, IL1RL2, IL1RN, IL2, IL20, IL20RA, IL20RB, IL21, IL21R, IL22, IL22RA1, IL23A, IL23R, IL24, IL25, IL26, IL27, IL27RA, IL2RA, IL2RB, IL2RG, IL3, IL32, IL4, IL4R, IL5, IL5RA, IL6, IL6R, IL6ST, IL7, IL7R, IL9, LEP, LEPR, LIF, LIFR, LTA, LTB, LTBR, MPL, NGF, NGFR, OSM, OSMR, PF4, PPBP, PRL, PRLR, RELT, TGFB1, TGFB2, TGFB3, TGFB11, TGFB12, TNF, TNFRSF11A, TNFRSF11B, TNFRSF12A, TNFRSF13B, TNFRSF13C, TNFRSF14, TNFRSF17, TNFRSF18, TNFRSF19, TNFRSF1A, TNFRSF1B, TNFRSF21, TNFRSF25, TNFRSF4, TNFRSF6B, TNFRSF8, TNFRSF9, TNFSF10, TNFSF11, TNFSF12, TNFSF13, TNFSF13B, TNFSF14, TNFSF15, TNFSF18, TNFSF4, TNFSF8, TNFSF9, TSLP, XCR1</i> |

|                                                         |                                                                                                                                                                                                                                                                                                                                                                                                                                                                                                                                                                                                                                                                                                                                                                                                                                                                                                     |
|---------------------------------------------------------|-----------------------------------------------------------------------------------------------------------------------------------------------------------------------------------------------------------------------------------------------------------------------------------------------------------------------------------------------------------------------------------------------------------------------------------------------------------------------------------------------------------------------------------------------------------------------------------------------------------------------------------------------------------------------------------------------------------------------------------------------------------------------------------------------------------------------------------------------------------------------------------------------------|
| Cytosolic DNA-sensing pathway (hsa04623)                | ADAR, AIM2, CASP1, CCL4, CCL5, CHUK, CXCL10, DDX58, IFNA1, IFNA10, IFNA13, IFNA14, IFNA16, IFNA17, IFNA2, IFNA21, IFNA4, IFNA5, IFNA6, IFNA7, IFNA8, IFNB1, IKKBK, IKBKE, IKBK, IL18, IL1B, IL6, IRF3, IRF7, MAVS, NFKB1, NFKBIA, NFKBIB, PYCARD, RELA, RIPK1, TBK1, TREX1, ZBP1                                                                                                                                                                                                                                                                                                                                                                                                                                                                                                                                                                                                                    |
| ErbB signaling pathway (hsa04012)                       | ABL1, AKT1, BAD, BRAF, CBL, CBLB, CDKN1B, CRK, CRKL, EGF, EGFR, EIF4EBP1, ELK1, ERBB2, ERBB3, GAB1, GRB2, GSK3B, HBEGF, HRAS, JUN, KRAS, MAP2K1, MAP2K2, MAP2K4, MAP2K7, MAPK1, MAPK10, MAPK3, MAPK8, MAPK9, MTOR, MYC, NCK1, NRAS, NRG1, PAK1, PAK2, PIK3CA, PIK3CB, PIK3CD, PLCG1, PLCG2, PRKCA, PRKCB, PTK2, RAF1, RPS6KB1, SHC1, SOS1, SRC, STAT5A, STAT5B, TGFA                                                                                                                                                                                                                                                                                                                                                                                                                                                                                                                                |
| Fc epsilon RI signaling pathway (hsa04664)              | AKT1, BTK, CSF2, FCER1A, FCER1G, FYN, GAB2, GRB2, HRAS, IL13, IL3, IL4, IL5, INPP5D, KRAS, LAT, LCP2, LYN, MAP2K1, MAP2K2, MAP2K3, MAP2K4, MAP2K6, MAP2K7, MAPK1, MAPK10, MAPK11, MAPK12, MAPK13, MAPK14, MAPK3, MAPK8, MAPK9, MS4A2, NRAS, PIK3CA, PIK3CB, PIK3CD, PLCG1, PLCG2, PRKCA, RAC1, RAC2, RAC3, RAF1, SOS1, SYK, TNF, VAV1, VAV2                                                                                                                                                                                                                                                                                                                                                                                                                                                                                                                                                         |
| Fc gamma R-mediated phagocytosis (hsa04666)             | AKT1, AMPH, ARF6, ASAP1, ASAP2, CDC42, CFL1, CRK, CRKL, DNM2, FCGR1A, FCGR2A, FCGR2B, FCGR3B, GAB2, GSN, HCK, INPP5D, LAT, LYN, MAP2K1, MAPK1, MAPK3, NCF1, PAK1, PIK3CA, PIK3CB, PIK3CD, PIP5K1A, PIP5K1C, PLA2G6, PLCG1, PLCG2, PRKCA, PRKCB, PRKCD, PRKCE, PTPRC, RAC1, RAC2, RAF1, RPS6KB1, SYK, VASP, VAV1, VAV2, WAS, WASL                                                                                                                                                                                                                                                                                                                                                                                                                                                                                                                                                                    |
| FoxO signaling pathway (hsa04068)                       | AKT1, ATM, BCL2L11, BCL6, BRAF, CAT, CCND1, CDK2, CDKN1B, CDKN2B, CHUK, CREBBP, EGF, EGFR, EP300, FASLG, FOXG1, FOXO1, FOXO3, GADD45B, GADD45G, GRB2, HOMER2, HOMER3, HRAS, IGF1, IKKBK, IL10, IL6, IL7R, INS, INSR, IRS1, KRAS, MAP2K1, MAP2K2, MAPK1, MAPK10, MAPK11, MAPK12, MAPK13, MAPK14, MAPK3, MAPK8, MAPK9, MDM2, NRAS, PIK3CA, PIK3CB, PIK3CD, PTEN, RAF1, RAG1, RAG2, SMAD3, SMAD4, SOD2, SOS1, STAT3, TGFB1, TGFB2, TGFB3, TGFBRI1, TGFBRI2, TNFSF10                                                                                                                                                                                                                                                                                                                                                                                                                                    |
| Hematopoietic cell lineage (hsa04640)                   | CD14, CD19, CD1A, CD1B, CD1C, CD1D, CD22, CD36, CD38, CD3D, CD3E, CD4, CD44, CD5, CD55, CD59, CD8A, CD8B, CR1, CR2, CSF1, CSF1R, CSF2, CSF3, CSF3R, DNMT, EPO, EPOR, FCER2, FCGR1A, FLT3, FLT3LG, GYPA, HLA-DOA, HLA-DOB, HLA-DPA1, HLA-DPB1, HLA-DQA1, HLA-DQA2, HLA-DQB1, HLA-DRA, HLA-DRB1, HLA-DRB5, IL11, IL11RA, IL1A, IL1B, IL1R1, IL1R2, IL2RA, IL3, IL4, IL4R, IL5, IL5RA, IL6, IL6R, IL7, IL7R, ITGA2, ITGA3, ITGA4, ITGA5, ITGAM, KIT, KITLG, TFR3, TNF                                                                                                                                                                                                                                                                                                                                                                                                                                  |
| HIF-1 signaling pathway (hsa04066)                      | AKT1, ANGPT1, ANGPT2, ARNT, BCL2, CDKN1B, CREBBP, CYBB, EGF, EGFR, EIF4E, EIF4EBP1, ENO1, ENO2, ENO3, EP300, EPO, ERBB2, FLT1, HIF1A, HMOX1, IFNG, IFNGR1, IFNGR2, IGF1, IL6, IL6R, INS, INSR, LTBR, MAP2K1, MAP2K2, MAPK1, MAPK3, MTOR, NFKB1, NOS2, PDHB, PDK1, PFKL, PFKM, PGK1, PIK3CA, PIK3CB, PIK3CD, PLCG1, PLCG2, PRKCA, PRKCB, RELA, RPS6KB1, SERPINE1, SLC2A1, STAT3, TEK, TF, TFR3, TIMP1, TLR4, VEGFA                                                                                                                                                                                                                                                                                                                                                                                                                                                                                   |
| IL-17 signaling pathway (hsa04657)                      | CASP3, CASP8, CCL11, CCL2, CCL7, CEBPB, CHUK, CSF2, CSF3, CXCL1, CXCL10, CXCL2, CXCL3, CXCL5, CXCL8, DEFBA4, FADD, FOS, GSK3B, IFNG, IKKBK, IKBKE, IKBK, IL13, IL17A, IL17B, IL17F, IL17RA, IL17RB, IL17RC, IL1B, IL25, IL4, IL5, IL6, JUN, JUND, MAP3K7, MAPK1, MAPK10, MAPK11, MAPK12, MAPK13, MAPK14, MAPK3, MAPK7, MAPK8, MAPK9, MMP1, MMP13, MMP3, MMP9, MUC5B, NFKB1, NFKBIA, PTGS2, RELA, TAB2, TAB3, TBK1, TNF, TNFAIP3, TRADD, TRAF2, TRAF3, TRAF3IP2, TRAF5, TRAF6                                                                                                                                                                                                                                                                                                                                                                                                                        |
| Intestinal immune network for IgA production (hsa04672) | AICDA, CCL25, CCR10, CCR9, CD28, CD40, CD40LG, CD80, CD86, CXCL12, CXCR4, HLA-DOA, HLA-DOB, HLA-DPA1, HLA-DPB1, HLA-DQA1, HLA-DQA2, HLA-DQB1, HLA-DRA, HLA-DRB1, HLA-DRB5, ICOS, ICOSLG, IL10, IL15, IL15RA, IL2, IL4, IL5, IL6, ITGA4, LTBR, MAP3K14, TGFB1, TNFRSF13B, TNFRSF13C, TNFRSF17, TNFSF13, TNFSF13B                                                                                                                                                                                                                                                                                                                                                                                                                                                                                                                                                                                     |
| JAK-STAT signaling pathway (hsa04630)                   | AKT1, BCL2, BCL2L1, CCND1, CISH, CNTF, CNTFR, CREBBP, CSF2, CSF2RB, CSF3, CSF3R, CTF1, EGF, EGFR, EP300, EPO, EPOR, GH1, GHR, GRB2, HRAS, IFNA1, IFNA10, IFNA13, IFNA14, IFNA16, IFNA17, IFNA2, IFNA21, IFNA4, IFNA5, IFNA6, IFNA7, IFNA8, IFNAR1, IFNAR2, IFNB1, IFNE, IFNG, IFNGR1, IFNGR2, IFNK, IFNL1, IFNLR1, IFNW1, IL10, IL10RA, IL10RB, IL11, IL11RA, IL12A, IL12B, IL12RB1, IL12RB2, IL13, IL13RA1, IL13RA2, IL15, IL15RA, IL19, IL2, IL20, IL20RA, IL20RB, IL21, IL21R, IL22, IL22RA1, IL22RA2, IL23A, IL23R, IL24, IL27RA, IL2RA, IL2RB, IL2RG, IL3, IL4, IL4R, IL5, IL5RA, IL6, IL6R, IL6ST, IL7, IL7R, IL9, IRF9, JAK1, JAK2, JAK3, LEP, LEPR, LIF, LIFR, MPL, MTOR, MYC, OSM, OSMR, PDGFRA, PDGFRB, PIAS1, PIK3CA, PIK3CB, PIK3CD, PIM1, PRL, PRLR, PTPN11, PTPN2, PTPN6, RAF1, SOCS1, SOCS2, SOCS3, SOCS6, SOS1, STAM, STAT1, STAT2, STAT3, STAT4, STAT5A, STAT5B, STAT6, TSLP, TYK2 |
| Leukocyte transendothelial migration (hsa04670)         | ACTN1, ACTN4, AFDN, CDC42, CDH5, CLDN1, CLDN19, CLDN5, CTNNA1, CTNNB1, CTNND1, CXCL12, CXCR4, CYBA, CYBB, EZR, F11R, ICAM1, ITGA4, ITGAL, ITGAM, ITGB1, ITGB2, ITK, JAM2, JAM3, MAPK11, MAPK12, MAPK13, MAPK14, MMP2, MMP9, NCF1, NCF2, NCF4, PECAM1, PIK3CA, PIK3CB, PIK3CD, PLCG1, PLCG2, PRKCA, PRKCB, PTK2, PTK2B, PTPN11, PXN, RAC1, RAC2, RASSF5, RHOA, RHOH, ROCK1, ROCK2, SIPA1, THY1, VASP, VAV1, VAV2, VCAM1, VCL                                                                                                                                                                                                                                                                                                                                                                                                                                                                         |

|                                                      |                                                                                                                                                                                                                                                                                                                                                                                                                                                                                                                                                                                                                                                                                                                                                                                                                                                                                                                                                                                                                                                                                 |
|------------------------------------------------------|---------------------------------------------------------------------------------------------------------------------------------------------------------------------------------------------------------------------------------------------------------------------------------------------------------------------------------------------------------------------------------------------------------------------------------------------------------------------------------------------------------------------------------------------------------------------------------------------------------------------------------------------------------------------------------------------------------------------------------------------------------------------------------------------------------------------------------------------------------------------------------------------------------------------------------------------------------------------------------------------------------------------------------------------------------------------------------|
| MAPK signaling pathway (hsa04010)                    | AKT1, ANGPT1, ANGPT2, ATF2, BRAF, CACNA1H, CACNA1S, CACNA2D2, CASP3, CD14, CDC42, CHUK, CRK, CRKL, CSF1, CSF1R, DAXX, DDIT3, DUSP1, ECSIT, EGF, EGFR, ELK1, ERBB2, ERBB3, FAS, FASLG, FGF10, FGF7, FLNB, FLT1, FLT3, FLT3LG, FLT4, FOS, GADD45B, GADD45G, GNA12, GRB2, HGF, HRAS, HSPA6, HSPA8, IGF1, IKBKB, IKBKG, IL1A, IL1B, IL1R1, IL1RAP, INS, INSR, IRAK1, IRAK4, JUNE, JUND, KDR, KIT, KITLG, KRAS, LAMTOR3, MAP2K1, MAP2K2, MAP2K3, MAP2K4, MAP2K5, MAP2K6, MAP2K7, MAP3K1, MAP3K14, MAP3K2, MAP3K3, MAP3K4, MAP3K5, MAP3K6, MAP3K7, MAP3K8, MAP4K1, MAP4K3, MAPK1, MAPK10, MAPK11, MAPK12, MAPK13, MAPK14, MAPK3, MAPK7, MAPK8, MAPK9, MAPKAPK2, MAPKAPK5, MAX, MET, MYC, MYD88, NFATC1, NFATC3, NFKB1, NFKB2, NGF, NGFR, NR4A1, NRAS, NTF3, NTRK1, PAK1, PAK2, PDGFRA, PDGFRB, PPP3CA, PPP3CB, PPP3CC, PPP3R1, PPP3R2, PRKCA, PRKCB, PTPN7, RAC1, RAC2, RAC3, RAF1, RASA1, RASGRP1, RASGRP3, REL, RELB, RPS6KA1, RPS6KA4, SOS1, SRF, TAB1, TAB2, TEK, TGFA, TGFB1, TGFB2, TGFB3, TGFBR1, TGFBR2, TNF, TNFRSF1A, TP53, TRADD, TRAF2, TRAF6, VEGFA, VEGFB, VEGFC, VEGFD |
| Natural killer cell mediated cytotoxicity (hsa04650) | BID, BRAF, CASP3, CD244, CD247, CD48, CSF2, FAS, FASLG, FCER1G, FCGR3B, FYN, GRB2, GZMB, HCST, HLA-A, HLA-B, HLA-C, HLA-E, HRAS, ICAM1, IFNA1, IFNA10, IFNA13, IFNA14, IFNA16, IFNA17, IFNA2, IFNA21, IFNA4, IFNA5, IFNA6, IFNA7, IFNA8, IFNAR1, IFNAR2, IFNB1, IFNG, IFNGR1, IFNGR2, ITGAL, ITGB2, KIR2DL1, KIR2DL3, KLRC1, KLRC2, KLRC3, KLRD1, KLRK1, KRAS, LAT, LCK, LCP2, MAP2K1, MAP2K2, MAPK1, MAPK3, MICA, MICB, NCR1, NCR2, NCR3, NFATC1, NFATC2, NRAS, PAK1, PIK3CA, PIK3CB, PIK3CD, PLCG1, PLCG2, PPP3CA, PPP3CB, PPP3CC, PPP3R1, PPP3R2, PRF1, PRKCA, PRKCB, PTK2B, PTPN11, PTPNG, RAC1, RAC2, RAC3, RAET1L, RAF1, SH2D1A, SH2D1B, SH3BP2, SHC1, SOS1, SYK, TNF, TNFSF10, TYROBP, ULBP3, VAV1, VAV2, ZAP70                                                                                                                                                                                                                                                                                                                                                          |
| Neurotrophin signaling pathway (hsa04722)            | ABL1, AKT1, BAD, BAX, BCL2, BRAF, CDC42, CRK, CRKL, FASLG, FOXO3, GAB1, GRB2, GSK3B, HRAS, IKBKB, IRAK1, IRAK2, IRAK3, IRAK4, IRS1, JUN, KRAS, MAP2K1, MAP2K2, MAP2K5, MAP2K7, MAP3K1, MAP3K3, MAP3K5, MAPK1, MAPK10, MAPK11, MAPK12, MAPK13, MAPK14, MAPK3, MAPK7, MAPK8, MAPK9, MAPKAPK2, NFKB1, NFKBIA, NFKBIB, NGF, NGFR, NRAS, NTF3, NTRK1, PIK3CA, PIK3CB, PIK3CD, PLCG1, PLCG2, PRKCD, PTPN11, RAC1, RAF1, RAPGEF1, REL, RHOA, RIPK2, RPS6KA1, SH2B1, SH2B3, SHC1, SOS1, TP53, TRAF6                                                                                                                                                                                                                                                                                                                                                                                                                                                                                                                                                                                     |
| NF-kappa B signaling pathway (hsa04064)              | ATM, BCL10, BCL2, BCL2A1, BCL2L1, BIRC2, BIRC3, BLNK, BTK, CARD10, CARD11, CCL13, CCL19, CCL21, CCL4, CD14, CD40, CD40LG, CFLAR, CHUK, CXCL1, CXCL12, CXCL2, CXCL3, CXCL8, CYLD, DDX58, EDA, EDA2R, EDAR, GADD45B, ICAM1, IKBKB, IKBKG, IL1B, IL1R1, IRAK1, IRAK4, LAT, LBP, LCK, LTA, LTB, LTBR, LY96, LYN, MALT1, MAP3K14, MAP3K7, MYD88, NFKB1, NFKB2, NFKBIA, PARP1, PLAU, PLCG1, PLCG2, PRKCB, PRKCD, PTGS2, REL, RELB, RIPK1, SYK, TAB1, TAB2, TAB3, TICAM1, TICAM2, TIRAP, TLR4, TNF, TNFAIP3, TNFRSF11A, TNFRSF13C, TNFRSF1A, TNFSF11, TNFSF13B, TNFSF14, TRADD, TRAF1, TRAF2, TRAF3, TRAF5, TRAF6, TRIM25, VCAM1, ZAP70                                                                                                                                                                                                                                                                                                                                                                                                                                                |
| NOD-like receptor signaling pathway (hsa04621)       | AIM2, ANTXR2, ATG16L1, BCL2, BCL2L1, BIRC2, BIRC3, CARD9, CASP1, CASP5, CASP8, CASR, CCL2, CCL5, CHUK, CXCL1, CXCL2, CXCL3, CXCL8, CYBA, CYBB, DEFA1, DEFB4A, DNM1L, FADD, IFI16, IFNA1, IFNA10, IFNA13, IFNA14, IFNA16, IFNA17, IFNA2, IFNA21, IFNA4, IFNA5, IFNA6, IFNA7, IFNA8, IFNAR1, IFNAR2, IFNB1, IKBKB, IKBKE, IKBKG, IL18, IL1B, IL6, IRAK4, IRF3, IRF7, IRF9, ITPR1, JAK1, JUN, MAP3K7, MAPK1, MAPK10, MAPK11, MAPK12, MAPK13, MAPK14, MAPK3, MAPK8, MAPK9, MAVS, MEFV, MYD88, NAIP, NFKB1, NFKBIA, NFKBIB, NLRC4, NLRP1, NLRP12, NLRP3, NLRP7, NLRX1, NOD1, NOD2, OAS1, OAS2, PLCB2, PRKCD, PSTPIP1, PYCARD, REL, RHOA, RIPK1, RIPK2, RNASEL, STAT1, STAT2, TAB1, TAB2, TAB3, TANK, TBK1, TICAM1, TLR4, TNF, TNFAIP3, TRAF2, TRAF3, TRAF5, TRAF6, TRPM7, TXN, TYK2                                                                                                                                                                                                                                                                                                  |
| Osteoclast differentiation (hsa04380)                | ACPS, AKT1, BLNK, BTK, CHUK, CREB1, CSF1, CSF1R, CTSK, CYBA, CYLD, FCGR1A, FCGR2A, FCGR2B, FCGR3B, FOS, FOSL2, FYN, GAB2, GRB2, IFNAR1, IFNAR2, IFNB1, IFNG, IFNGR1, IFNGR2, IKBKB, IKBKG, IL1A, IL1B, IL1R1, IRF9, JAK1, JUN, JUNB, JUND, LCK, LCP2, LILRB1, LILRB4, MAP2K1, MAP2K6, MAP2K7, MAP3K14, MAP3K7, MAPK1, MAPK10, MAPK11, MAPK12, MAPK13, MAPK14, MAPK3, MAPK8, MAPK9, MITF, NCF1, NCF2, NCF4, NFATC1, NFATC2, NFKB1, NFKB2, NFKBIA, NOX1, OSCAR, PIK3CA, PIK3CB, PIK3CD, PLCG2, PPARG, PPP3CA, PPP3CB, PPP3CC, PPP3R1, PPP3R2, RAC1, REL, RELB, SIRPA, SOCS1, SOCS3, SPI1, STAT1, STAT2, SYK, TAB1, TAB2, TGFB1, TGFB2, TGFBR1, TGFBR2, TNF, TNFRSF11A, TNFRSF11B, TNFRSF1A, TNFSF11, TRAF2, TRAF6, TREM2, TYK2, TYROBP                                                                                                                                                                                                                                                                                                                                            |
| Prolactin signaling pathway (hsa04917)               | AKT1, CCND1, CGA, CISH, CSN2, CYP17A1, ESR1, ESR2, FOS, FOXO3, GRB2, GSK3B, HRAS, INS, IRF1, JAK2, KRAS, MAP2K1, MAP2K2, MAPK1, MAPK10, MAPK11, MAPK12, MAPK13, MAPK14, MAPK3, MAPK8, MAPK9, NFKB1, NRAS, PIK3CA, PIK3CB, PIK3CD, PRL, PRLR, RAF1, REL, SHC1, SOCS1, SOCS2, SOCS3, SOCS6, SOS1, SRC, STAT1, STAT3, STAT5A, STAT5B, TH, TNFRSF11A, TNFSF11                                                                                                                                                                                                                                                                                                                                                                                                                                                                                                                                                                                                                                                                                                                       |
| RIG-I-like receptor signaling pathway (hsa04622)     | AZ12, CASP10, CASP8, CHUK, CXCL10, CXCL8, CYLD, DDX58, DHX58, FADD, IFI1, IFNA1, IFNA10, IFNA13, IFNA14, IFNA16, IFNA17, IFNA2, IFNA21, IFNA4, IFNA5, IFNA6, IFNA7, IFNA8, IFNB1, IFNE, IFNK, IFNW1, IKBKB, IKBKE, IKBKG, IL12A, IL12B, IRF3, IRF7, ISG15, MAP3K1, MAP3K7, MAPK10, MAPK11, MAPK12, MAPK13, MAPK14, MAPK8, MAPK9, MAVS, NFKB1, NFKBIA, NFKBIB, NLRX1, PIN1, REL, RIPK1, SIKE1, TANK, TBK1, TBKBP1, TNF, TRADD, TRAF2, TRAF3, TRAF6, TRIM25                                                                                                                                                                                                                                                                                                                                                                                                                                                                                                                                                                                                                       |

|                                                                          |                                                                                                                                                                                                                                                                                                                                                                                                                                                                                                                                                                                                                                                                                                             |
|--------------------------------------------------------------------------|-------------------------------------------------------------------------------------------------------------------------------------------------------------------------------------------------------------------------------------------------------------------------------------------------------------------------------------------------------------------------------------------------------------------------------------------------------------------------------------------------------------------------------------------------------------------------------------------------------------------------------------------------------------------------------------------------------------|
| T cell receptor signaling pathway (hsa04660)                             | <i>AKT1, BCL10, CARD11, CBLB, CD247, CD28, CD3D, CD3E, CD4, CD40LG, CD8A, CD8B, CDC42, CDK4, CHUK, CSF2, CTLA4, FOS, FYN, GRAP2, GRB2, GSK3B, HRAS, ICOS, IFNG, IKKBK, IKBK, IL10, IL2, IL4, IL5, ITK, JUN, KRAS, LAT, LCK, LCP2, MALT1, MAP2K1, MAP2K2, MAP2K7, MAP3K14, MAP3K7, MAP3K8, MAPK1, MAPK10, MAPK11, MAPK12, MAPK13, MAPK14, MAPK3, MAPK8, MAPK9, NCK1, NFATC1, NFATC2, NFATC3, NFKB1, NFKBIA, NFKBIB, NRAS, PAK1, PAK2, PIK3CA, PIK3CB, PIK3CD, PLCG1, PPP3CA, PPP3CB, PPP3CC, PPP3R1, PPP3R2, PRKCQ, PTPN6, PTPRC, RAF1, RASGRP1, RELA, RHOA, SOS1, TNF, VAV1, VAV2, ZAP70</i>                                                                                                                |
| Th1 and Th2 cell differentiation (hsa04658)                              | <i>CD247, CD3D, CD3E, CD4, CHUK, FOS, GATA3, HLA-DOA, HLA-DOB, HLA-DPA1, HLA-DPB1, HLA-DQA1, HLA-DQA2, HLA-DQB1, HLA-DRA, HLA-DRB1, HLA-DRB5, IFNG, IFNGR1, IFNGR2, IKKBK, IKBK, IL12A, IL12B, IL12RB1, IL12RB2, IL13, IL2, IL2RA, IL2RB, IL2RG, IL4, IL4R, IL5, JAK1, JAK2, JAK3, JUN, LAT, LCK, MAF, MAML1, MAPK1, MAPK10, MAPK11, MAPK12, MAPK13, MAPK14, MAPK3, MAPK8, MAPK9, NFATC1, NFATC2, NFATC3, NFKB1, NFKBIA, NFKBIB, NOTCH1, NOTCH2, NOTCH3, PLCG1, PPP3CA, PPP3CB, PPP3CC, PPP3R1, PPP3R2, PRKCQ, RBPJ, RELA, RUNX3, STAT1, STAT4, STAT5A, STAT5B, STAT6, TBX21, TYK2, ZAP70</i>                                                                                                               |
| Th17 cell differentiation (hsa04659)                                     | <i>AHR, CD247, CD3D, CD3E, CD4, CHUK, FOS, FOXP3, GATA3, HIF1A, HLA-DOA, HLA-DOB, HLA-DPA1, HLA-DPB1, HLA-DQA1, HLA-DQA2, HLA-DQB1, HLA-DRA, HLA-DRB1, HLA-DRB5, IFNG, IFNGR1, IFNGR2, IKKBK, IKBK, IL12RB1, IL17A, IL17F, IL1B, IL1R1, IL1RAP, IL2, IL21, IL21R, IL22, IL23A, IL23R, IL27RA, IL2RA, IL2RB, IL2RG, IL4, IL4R, IL6, IL6R, IL6ST, IRF4, JAK1, JAK2, JAK3, JUN, LAT, LCK, MAPK1, MAPK10, MAPK11, MAPK12, MAPK13, MAPK14, MAPK3, MAPK8, MAPK9, MTOR, NFATC1, NFATC2, NFATC3, NFKB1, NFKBIA, NFKBIB, PLCG1, PPP3CA, PPP3CB, PPP3CC, PPP3R1, PPP3R2, PRKCQ, RARA, RELA, RORA, RORC, RUNX1, RXRA, SMAD2, SMAD4, STAT1, STAT3, STAT5A, STAT5B, STAT6, TBX21, TGFB1, TGFB1R1, TGFB2, TYK2, ZAP70</i> |
| TNF signaling pathway (hsa04668)                                         | <i>AKT1, ATF2, BAG4, BCL3, BIRC2, BIRC3, CASP10, CASP3, CASP8, CCL2, CCL5, CEBPB, CFLAR, CHUK, CREB1, CSF1, CSF2, CX3CL1, CXCL1, CXCL10, CXCL2, CXCL3, CXCL5, DNM1L, FADD, FAS, FOS, ICAM1, IFNB1, IKKBK, IKBK, IL15, IL18R1, IL1B, IL6, IRF1, JUN, JUNB, LIF, LTA, MAP2K1, MAP2K3, MAP2K4, MAP2K6, MAP2K7, MAP3K14, MAP3K5, MAP3K7, MAP3K8, MAPK1, MAPK10, MAPK11, MAPK12, MAPK13, MAPK14, MAPK3, MAPK8, MAPK9, MMP14, MMP3, MMP9, NFKB1, NFKBIA, NOD2, PIK3CA, PIK3CB, PIK3CD, PTGS2, RELA, RIPK1, RPS6KA4, SELE, SOCS3, TAB1, TAB2, TAB3, TNF, TNFAIP3, TNFRSF1A, TNFRSF1B, TRADD, TRAF1, TRAF2, TRAF3, TRAF5, VCAM1, VEGFC, VEGFD</i>                                                                   |
| Toll-like receptor signaling pathway (hsa04620)                          | <i>AKT1, CASP8, CCL3, CCL3L3, CCL4, CCL5, CD14, CD40, CD80, CD86, CHUK, CTSK, CXCL10, CXCL11, CXCL8, CXCL9, FADD, FOS, IFNA1, IFNA10, IFNA13, IFNA14, IFNA16, IFNA17, IFNA2, IFNA21, IFNA4, IFNA5, IFNA6, IFNA7, IFNA8, IFNAR1, IFNAR2, IFNB1, IKKBK, IKBKE, IKBK, IL12A, IL12B, IL1B, IL6, IRAK1, IRAK4, IRF3, IRF5, IRF7, JUN, LBP, LY96, MAP2K1, MAP2K2, MAP2K3, MAP2K4, MAP2K6, MAP2K7, MAP3K7, MAP3K8, MAPK1, MAPK10, MAPK11, MAPK12, MAPK13, MAPK14, MAPK3, MAPK8, MAPK9, MYD88, NFKB1, NFKBIA, PIK3CA, PIK3CB, PIK3CD, RAC1, RELA, RIPK1, SPP1, STAT1, TAB1, TAB2, TBK1, TICAM1, TICAM2, TIRAP, TLR1, TLR2, TLR3, TLR4, TLR5, TLR6, TLR7, TLR8, TLR9, TNF, TOLLIP, TRAF3, TRAF6</i>                  |
| VEGF signaling pathway (hsa04370)                                        | <i>AKT1, BAD, CASP9, CDC42, HRAS, KDR, KRAS, MAP2K1, MAP2K2, MAPK1, MAPK11, MAPK12, MAPK13, MAPK14, MAPK3, MAPKAPK2, NFATC2, NRAS, PIK3CA, PIK3CB, PIK3CD, PLCG1, PLCG2, PPP3CA, PPP3CB, PPP3CC, PPP3R1, PPP3R2, PRKCA, PRKCB, PTGS2, PTK2, PXN, RAC1, RAC2, RAC3, RAF1, SRC, VEGFA</i>                                                                                                                                                                                                                                                                                                                                                                                                                     |
| Viral protein interaction with cytokine and cytokine receptor (hsa04061) | <i>ACKR3, CCL1, CCL11, CCL13, CCL19, CCL2, CCL21, CCL24, CCL25, CCL26, CCL3, CCL3L3, CCL4, CCL5, CCL7, CCR1, CCR10, CCR2, CCR3, CCR4, CCR5, CCR6, CCR7, CCR8, CCR9, CSF1, CSF1R, CX3CL1, CX3CR1, CXCL1, CXCL10, CXCL11, CXCL12, CXCL13, CXCL14, CXCL2, CXCL3, CXCL5, CXCL8, CXCL9, CXCR1, CXCR2, CXCR3, CXCR4, CXCR5, IL10, IL10RA, IL10RB, IL18, IL18R1, IL18RAP, IL19, IL2, IL20, IL20RA, IL20RB, IL22RA1, IL24, IL2RA, IL2RB, IL2RG, IL6, IL6R, IL6ST, LTA, LTBR, PF4, PPBP, TNF, TNFRSF14, TNFRSF1A, TNFRSF1B, TNFSF10, TNFSF14, XCR1</i>                                                                                                                                                               |

**Supplementary Table S3.** SLE case-control pathway based aggregate association analysis result (SKAT-O).

| Pathway (KEGG ID)                                                        | Ratio genes on   |                | SNVs in | P-value | FDR     |                         |
|--------------------------------------------------------------------------|------------------|----------------|---------|---------|---------|-------------------------|
|                                                                          | Genes in pathway | Genes on array |         |         |         | array/ genes in pathway |
| Th1 and Th2 cell differentiation (hsa04658)                              | 92               | 78             | 0.85    | 14362   | 6.3E-11 | 2.2E-09                 |
| Antigen processing and presentation (hsa04612)                           | 77               | 40             | 0.52    | 8017    | 1.8E-10 | 3.1E-09                 |
| Hematopoietic cell lineage (hsa04640)                                    | 97               | 71             | 0.73    | 13013   | 3.8E-10 | 4.5E-09                 |
| Th17 cell differentiation (hsa04659)                                     | 107              | 96             | 0.90    | 19347   | 1.7E-09 | 1.5E-08                 |
| Intestinal immune network for IgA production (hsa04672)                  | 49               | 39             | 0.80    | 7909    | 3.4E-08 | 2.4E-07                 |
| Natural killer cell mediated cytotoxicity (hsa04650)                     | 131              | 100            | 0.76    | 15821   | 4.7E-06 | 2.8E-05                 |
| TNF signaling pathway (hsa04668)                                         | 112              | 88             | 0.79    | 12639   | 1.9E-05 | 9.4E-05                 |
| JAK-STAT signaling pathway (hsa04630)                                    | 162              | 133            | 0.82    | 18003   | 7.4E-05 | 0.00032                 |
| RIG-I-like receptor signaling pathway (hsa04622)                         | 70               | 63             | 0.90    | 8459    | 0.00021 | 0.00080                 |
| NOD-like receptor signaling pathway (hsa04621)                           | 178              | 109            | 0.61    | 15729   | 0.00031 | 0.0011                  |
| Complement and coagulation cascades (hsa04610)                           | 79               | 50             | 0.63    | 7112    | 0.00041 | 0.0013                  |
| Toll-like receptor signaling pathway (hsa04620)                          | 104              | 96             | 0.92    | 12178   | 0.00080 | 0.0022                  |
| Cytokine-cytokine receptor interaction (hsa04060)                        | 294              | 221            | 0.75    | 26771   | 0.00083 | 0.0022                  |
| C-type lectin receptor signaling pathway (hsa04625)                      | 104              | 75             | 0.72    | 12986   | 0.0020  | 0.0050                  |
| IL-17 signaling pathway (hsa04657)                                       | 93               | 68             | 0.73    | 9358    | 0.0043  | 0.0100                  |
| Fc epsilon RI signaling pathway (hsa04664)                               | 68               | 51             | 0.75    | 8514    | 0.0052  | 0.011                   |
| Viral protein interaction with cytokine and cytokine receptor (hsa04061) | 100              | 75             | 0.75    | 8435    | 0.0062  | 0.013                   |
| NF-kappa B signaling pathway (hsa04064)                                  | 102              | 88             | 0.86    | 14349   | 0.0078  | 0.015                   |
| Osteoclast differentiation (hsa04380)                                    | 128              | 101            | 0.79    | 18602   | 0.013   | 0.023                   |
| T cell receptor signaling pathway (hsa04660)                             | 103              | 85             | 0.83    | 14268   | 0.014   | 0.025                   |
| Cytosolic DNA-sensing pathway (hsa04623)                                 | 63               | 40             | 0.63    | 4993    | 0.015   | 0.025                   |
| B cell receptor signaling pathway (hsa04662)                             | 82               | 61             | 0.74    | 11330   | 0.037   | 0.059                   |
| HIF-1 signaling pathway (hsa04066)                                       | 109              | 60             | 0.55    | 11748   | 0.043   | 0.065                   |
| Fc gamma R-mediated phagocytosis (hsa04666)                              | 94               | 48             | 0.51    | 9608    | 0.055   | 0.080                   |
| Apoptosis (hsa04210)                                                     | 136              | 78             | 0.57    | 12115   | 0.066   | 0.092                   |
| Prolactin signaling pathway (hsa04917)                                   | 70               | 51             | 0.73    | 7599    | 0.15    | 0.20                    |
| MAPK signaling pathway (hsa04010)                                        | 295              | 151            | 0.51    | 27384   | 0.16    | 0.20                    |
| Chemokine signaling pathway (hsa04062)                                   | 190              | 111            | 0.58    | 15084   | 0.16    | 0.20                    |
| Neurotrophin signaling pathway (hsa04722)                                | 119              | 70             | 0.59    | 12388   | 0.18    | 0.22                    |
| VEGF signaling pathway (hsa04370)                                        | 59               | 39             | 0.66    | 7440    | 0.19    | 0.22                    |
| ErbB signaling pathway (hsa04012)                                        | 85               | 54             | 0.64    | 11201   | 0.28    | 0.31                    |
| FoxO signaling pathway (hsa04068)                                        | 132              | 67             | 0.51    | 10643   | 0.29    | 0.31                    |
| Adherens junction (hsa04520)                                             | 72               | 42             | 0.58    | 9633    | 0.29    | 0.31                    |
| Apoptosis - multiple species (hsa04215)                                  | 33               | 20             | 0.61    | 3722    | 0.31    | 0.32                    |
| Leukocyte transendothelial migration (hsa04670)                          | 112              | 64             | 0.57    | 11444   | 0.35    | 0.35                    |

FDR: False Discovery Rate

**Supplementary Table S4.** Pathway SLE polygenic risk scores, SLE patients positive for each pathway. The threshold for the pathway PRS was set at the 97.5th percentile in control individuals.

| Pathway name (KEGG ID)                                                   | N SLE SNVs<br>in PRS | N patients<br>positive | Percent patients<br>positive |
|--------------------------------------------------------------------------|----------------------|------------------------|------------------------------|
| Cytokine-cytokine receptor interaction (hsa04060)                        | 297                  | 390                    | 40.7%                        |
| Osteoclast differentiation (hsa04380)                                    | 200                  | 336                    | 35.1%                        |
| MAPK signaling pathway (hsa04010)                                        | 263                  | 333                    | 34.8%                        |
| Jak-STAT signaling pathway (hsa04630)                                    | 214                  | 276                    | 28.8%                        |
| Chemokine signaling pathway (hsa04062)                                   | 158                  | 256                    | 26.7%                        |
| TNF signaling pathway (hsa04668)                                         | 144                  | 247                    | 25.8%                        |
| NF-kappa B signaling pathway (hsa04064)                                  | 157                  | 246                    | 25.7%                        |
| T cell receptor signaling pathway (hsa04660)                             | 160                  | 230                    | 24.0%                        |
| Neurotrophin signaling pathway (hsa04722)                                | 124                  | 227                    | 23.7%                        |
| HIF-1 signaling pathway (hsa04066)                                       | 113                  | 223                    | 23.3%                        |
| NOD-like receptor signaling pathway (hsa04621)                           | 161                  | 219                    | 22.9%                        |
| Toll-like receptor signaling pathway (hsa04620)                          | 138                  | 212                    | 22.1%                        |
| C-type lectin receptor signaling pathway (hsa04625)                      | 136                  | 209                    | 21.8%                        |
| Complement and coagulation cascades (hsa04610)                           | 73                   | 198                    | 20.7%                        |
| Th17 cell differentiation (hsa04659)                                     | 227                  | 196                    | 20.5%                        |
| Apoptosis (hsa04210)                                                     | 118                  | 190                    | 19.8%                        |
| Leukocyte transendothelial migration (hsa04670)                          | 106                  | 190                    | 19.8%                        |
| Hematopoietic cell lineage (hsa04640)                                    | 145                  | 175                    | 18.3%                        |
| Natural killer cell mediated cytotoxicity (hsa04650)                     | 194                  | 174                    | 18.2%                        |
| Th1 and Th2 cell differentiation (hsa04658)                              | 187                  | 174                    | 18.2%                        |
| B cell receptor signaling pathway (hsa04662)                             | 128                  | 172                    | 18.0%                        |
| IL-17 signaling pathway (hsa04657)                                       | 102                  | 171                    | 17.8%                        |
| ErbB signaling pathway (hsa04012)                                        | 107                  | 169                    | 17.6%                        |
| RIG-I-like receptor signaling pathway (hsa04622)                         | 91                   | 158                    | 16.5%                        |
| FoxO signaling pathway (hsa04068)                                        | 119                  | 157                    | 16.4%                        |
| Prolactin signaling pathway (hsa04917)                                   | 85                   | 153                    | 16.0%                        |
| Fc epsilon RI signaling pathway (hsa04664)                               | 98                   | 149                    | 15.6%                        |
| Antigen processing and presentation (hsa04612)                           | 127                  | 149                    | 15.6%                        |
| Fc gamma R-mediated phagocytosis (hsa04666)                              | 107                  | 143                    | 14.9%                        |
| Viral protein interaction with cytokine and cytokine receptor (hsa04061) | 96                   | 143                    | 14.9%                        |
| Adherens junction (hsa04520)                                             | 87                   | 142                    | 14.8%                        |
| VEGF signaling pathway (hsa04370)                                        | 81                   | 133                    | 13.9%                        |
| Cytosolic DNA-sensing pathway (hsa04623)                                 | 40                   | 124                    | 12.9%                        |
| Intestinal immune network for IgA production (hsa04672)                  | 106                  | 117                    | 12.2%                        |
| Apoptosis - multiple species (hsa04215)                                  | 41                   | 91                     | 9.5%                         |

**Supplementary Table S5.** Analysed gene-sets and their genes. Only sequenced genes are listed.

| Gene set         | Genes (RefSeq)                                                                                                                                                                                                                                                                                                                                                                                                                                                                                                                                                                                                                               | References                                                                                                      |
|------------------|----------------------------------------------------------------------------------------------------------------------------------------------------------------------------------------------------------------------------------------------------------------------------------------------------------------------------------------------------------------------------------------------------------------------------------------------------------------------------------------------------------------------------------------------------------------------------------------------------------------------------------------------|-----------------------------------------------------------------------------------------------------------------|
| Interferon       | <i>DDX58, IFI16, IFIH1, IFNA1, IFNA10, IFNA13, IFNA14, IFNA16, IFNA17, IFNA2, IFNA21, IFNA4, IFNA5, IFNA6, IFNA7, IFNA8, IFNAR1, IFNAR2, IFNB1, IFNE, IFNK, IFNW1, IRF5, IRF7, IRF9, JAK1, MAVS, PRKDC, STAT1, STAT2, STAT4, TYK2, ZBP1</i>                                                                                                                                                                                                                                                                                                                                                                                                  | Rönblom & Leonard, 2019 (PMID:31497305)                                                                         |
| Interferonopathy | <i>ACP5, ADAR, C1QA, C1QB, C1QC, COPA, DDX58, IFIH1, ISG15, PSMB8, TREX1</i>                                                                                                                                                                                                                                                                                                                                                                                                                                                                                                                                                                 | Rodero & Crow, 2016 (PMID:27821552); Rodero et al., 2017 (PMID:29259162); Davidson et al., 2018 (PMID:29846818) |
| SLE GWAS         | <i>ABHD6, ATXN2, BACH2, BANK1, BLK, CD226, CD40, CD44, CD80, CDKN1B, CIITA, CLEC16A, CSK, CXCR5, ELF1, ETS1, EVI5, FAM167A, FAM98B, FCGR2A, GALC, GRAP2, GRB2, GTF2I, HCFC1, HIC2, HIP1, HLA-B, HLA-C, HLA-DQA1, HLA-DQA2, HLA-DRB1, ICAM1, IFIH1, IFNLR1, IKBKE, IKZF1, IKZF3, IL10, IL12A, IL12B, IL12RB2, IL21, IRAK1, IRF5, IRF7, IRF8, JAK2, LBH, LPP, LYN, LYST, MICB, MSH5, NCF2, NFKBIA, NOTCH2, NOTCH4, OLIG3, PHRF1, PLAT, PRDM1, PTPN22, PTPRC, PTTG1, PXX, RAD51B, RASGRP1, RASGRP3, RNF114, SH2B3, SLC15A4, SOCS1, SPRED2, STAT4, TCF7, TLR7, TNFAIP3, TNFSF4, TNIP1, TNPO3, TNXB, TRAFD1, TYK2, UBE2L3, WDFY4, YDJC, ZFP90</i> | Chen et al., 2017 (PMID:28509669); Langefeld et al., 2017 (PMID:28714469)                                       |
| Complement       | <i>C1QA, C1QB, C1QC, C1R, C1S, C2, C3, C3AR1, C4A, C4B, C4BPA, C5, C5AR1, C6, C7, C9, CD46, CD55, CD59, CFB, CFD, CFH, CFI, CR1, CR2, ITGAM, ITGAX, ITGB2, MASP1, MASP2, MBL2, SERPING1</i>                                                                                                                                                                                                                                                                                                                                                                                                                                                  | Complement subset of the KEGG Complement and coagulation cascades pathway (hsa04610)                            |
| Monogenic SLE    | <i>ACP5, ADAR, C1QA, C1QB, C1QC, C1R, C1S, C2, C3, C4A, C4B, CYBB, DDX58, DNASE1L3, FAS, FASLG, IFIH1, ISG15, PRKCD, PSMB8, PTPN11, RAG1, RAG2, TREX1</i>                                                                                                                                                                                                                                                                                                                                                                                                                                                                                    | Tsokos et al., 2016 (PMID:27872476)                                                                             |



**Supplementary Table S6.** Top gene regions from aggregate testing (SKAT-O). Potentially novel loci are indicated in bold and only gene regions with FDR 0.05 or less are listed.

| Gene region <sup>a</sup> | Chr | Start bp  | End bp    | N variants | Non-synonymous variants <sup>b</sup> | Conserved variants <sup>c</sup> | Top SNV <sup>d</sup> | FDR     | P-value |
|--------------------------|-----|-----------|-----------|------------|--------------------------------------|---------------------------------|----------------------|---------|---------|
| <i>TNXB</i>              | 6   | 31908832  | 32177251  | 362        | 43                                   | 102                             | rs369580             | 1.7E-13 | 9.1E-17 |
| <b><i>PABPC4</i></b>     | 1   | 39926385  | 40142621  | 132        | 10                                   | 45                              | rs879037             | 6.6E-06 | 4.3E-08 |
| <b><i>IFNK</i></b>       | 9   | 27424212  | 27626596  | 231        | 7                                    | 58                              | rs895023             | 0.00081 | 1.2E-05 |
| <i>ATF2</i>              | 2   | 175836878 | 176133034 | 166        | 4                                    | 64                              | rs79907460           | 0.0091  | 0.00016 |
| <i>SLC30A6</i>           | 2   | 32290810  | 32549548  | 160        | 14                                   | 33                              | rs2365556            | 0.025   | 0.00048 |
| <i>SERPING1</i>          | 11  | 57264927  | 57482426  | 167        | 14                                   | 42                              | rs12801093           | 0.04    | 0.0008  |
| <i>SRD5A2</i>            | 2   | 31649556  | 31906140  | 48         | 0                                    | 3                               | rs28383069           | 0.04    | 0.00083 |
| <i>SPAST</i>             | 2   | 32188580  | 32482806  | 190        | 12                                   | 31                              | rs2365556            | 0.042   | 0.0009  |
| <i>MEMO1</i>             | 2   | 31992779  | 32336221  | 110        | 0                                    | 21                              | rs533970             | 0.046   | 0.0011  |

Only the top gene in the extended MHC on chr 6 is listed. Associations surviving Bonferroni correction for multiple testing (1832 gene regions) are above the line ( $P < 2.7E-05$ ). a) Gene regions included  $\pm 100$ kb to cover targeted regulatory regions; b) missense or nonsense variants; c) constrained variants defined as GERP RS score  $> 2$ ; d) Top associated SNV from the SLE case-control single variant logistic regression analysis. Bp: base pair, SNV: single nucleotide variant, FDR: False Discovery Rate.

**Supplementary Table 7.** Top gene regions from SLE case-control aggregate association testing including functional annotation (GenePy). Gene regions with P-values surviving permutation testing are listed.

| Gene region     | Chr | Start BP  | End BP    | SNVs in test | Annotation | P-value |
|-----------------|-----|-----------|-----------|--------------|------------|---------|
| <i>MSH5</i>     | 6   | 31706725  | 31731455  | 11           | CADD       | 4.6E-15 |
| <i>CYP21A2</i>  | 6   | 32005093  | 32010447  | 23           | CADD       | 4.4E-12 |
| <i>TNXB</i>     | 6   | 32007932  | 32078151  | 69           | CADD       | 1.4E-11 |
| <i>HLA-DOB</i>  | 6   | 32779540  | 32785825  | 74           | CADD       | 7.2E-11 |
| <i>AGER</i>     | 6   | 32147745  | 32153099  | 29           | CADD       | 1.6E-10 |
| <i>HLA-DQB2</i> | 6   | 32722837  | 32732330  | 65           | CADD       | 2.5E-09 |
| <i>MICA</i>     | 6   | 31366561  | 31384090  | 196          | CADD       | 2.3E-08 |
| <i>NOTCH4</i>   | 6   | 32161620  | 32192844  | 120          | CADD       | 2.7E-08 |
| <i>BTNL2</i>    | 6   | 32361513  | 32375900  | 34           | CADD       | 1.8E-07 |
| <i>BANK1</i>    | 4   | 102710764 | 102996969 | 227          | CADD       | 8.2E-07 |
| <i>HLA-C</i>    | 6   | 31235526  | 31240913  | 169          | CADD       | 9.5E-07 |
| <i>IRF5</i>     | 7   | 128576976 | 128591089 | 44           | CADD       | 2.2E-06 |
| <i>CFB</i>      | 6   | 31912721  | 31920861  | 33           | CADD       | 1.1E-05 |
| <i>HLA-DQA1</i> | 6   | 32604169  | 32613152  | 512          | CADD       | 1.5E-05 |
| <i>MICB</i>     | 6   | 31461054  | 31479901  | 13           | REVEL      | 6.6E-24 |
| <i>TAP2</i>     | 6   | 32788610  | 32807547  | 15           | REVEL      | 1.1E-09 |
| <i>HLA-C</i>    | 6   | 31235526  | 31240913  | 15           | REVEL      | 5.8E-08 |
| <i>BTNL2</i>    | 6   | 32361513  | 32375900  | 35           | REVEL      | 3.5E-07 |
| <i>HLA-DQB1</i> | 6   | 32626241  | 32635466  | 18           | REVEL      | 4.1E-06 |
| <i>CFB</i>      | 6   | 31912721  | 31920861  | 14           | REVEL      | 2.0E-05 |
| <i>MICA</i>     | 6   | 31366561  | 31384090  | 26           | REVEL      | 2.2E-05 |
| <i>BANK1</i>    | 4   | 102710764 | 102996969 | 16           | REVEL      | 3.4E-05 |
| <i>SLC15A4</i>  | 12  | 129276739 | 129309541 | 5            | REVEL      | 4.0E-05 |
| <i>HLA-B</i>    | 6   | 31320649  | 31325989  | 12           | REVEL      | 6.9E-05 |

CADD: weights including 63 annotations, such as conservation metrics, functional genomic data, transcript information and protein level scores;

REVEL: weights based on pathogenicity of rare missense variants.

**Supplementary Table S8.** Single variant SLE case-control association results Swedish cohort, independent loci with  $P < 1 \times 10^{-4}$ .

| CHR | BP        | SNV         | Locus                    | Minor/major allele | MAF case | MAF control | OR   | FDR     | P       |
|-----|-----------|-------------|--------------------------|--------------------|----------|-------------|------|---------|---------|
| 6   | 31708463  | rs3131381   | <i>MSH5</i>              | A/C                | 0.248    | 0.113       | 2.82 | 6.2E-23 | 6.7E-28 |
| 6   | 32612110  | rs9273058   | <i>HLA-DQA1</i>          | C/T                | 0.339    | 0.504       | 0.49 | 2.9E-20 | 1.3E-23 |
| 6   | 31464798  | rs2534675   | <i>MICB</i>              | T/C                | 0.449    | 0.292       | 2.02 | 6.0E-20 | 3.2E-23 |
| 7   | 128695983 | rs13239597  | <i>IRF5/TNPO3</i>        | A/C                | 0.238    | 0.143       | 1.88 | 4.1E-11 | 1.1E-13 |
| 1   | 183542323 | rs17849501  | <i>NCF2</i>              | T/C                | 0.108    | 0.053       | 2.33 | 3.3E-09 | 1.6E-11 |
| 2   | 191925424 | rs3024859   | <i>STAT4</i>             | T/C                | 0.279    | 0.199       | 1.54 | 2.1E-06 | 1.4E-08 |
| 7   | 50308692  | rs876037    | <i>IKZF1</i>             | A/T                | 0.242    | 0.312       | 0.66 | 3.4E-06 | 2.3E-08 |
| 16  | 11198932  | rs35300161  | <i>CLEC16A</i>           | T/C                | 0.133    | 0.188       | 0.63 | 0.00013 | 1.2E-06 |
| 2   | 191919354 | rs11676659  | <i>STAT4</i>             | G/A                | 0.033    | 0.063       | 0.46 | 0.00018 | 1.6E-06 |
| 6   | 106594719 | rs2179175   | <i>PRDM1</i>             | T/C                | 0.278    | 0.222       | 1.44 | 0.00036 | 3.5E-06 |
| 9   | 27483959  | rs895023    | <b><i>MOB3B/IFNK</i></b> | G/A                | 0.026    | 0.056       | 0.45 | 0.00065 | 6.9E-06 |
| 12  | 129294244 | rs11059926  | <i>SLC15A4</i>           | T/A                | 0.132    | 0.084       | 1.60 | 0.00088 | 9.5E-06 |
| 12  | 96374683  | rs6538696   | <b><i>HAL</i></b>        | T/C                | 0.533    | 0.467       | 1.34 | 0.0013  | 1.4E-05 |
| 2   | 30961022  | rs55799526  | <b><i>CAPN13</i></b>     | G/C                | 0.057    | 0.094       | 0.58 | 0.0018  | 2.1E-05 |
| 4   | 102340309 | rs10433984  | <i>BANK1</i>             | A/T                | 0.301    | 0.250       | 1.37 | 0.0026  | 3.0E-05 |
| 5   | 150442171 | rs3792790   | <i>TNIP1</i>             | C/A                | 0.459    | 0.529       | 0.75 | 0.0027  | 3.2E-05 |
| 6   | 138230040 | rs200820567 | <i>TNFAIP3</i>           | A/T                | 0.061    | 0.035       | 1.89 | 0.0034  | 4.2E-05 |
| 10  | 64427649  | rs7075349   | <i>ZNF365/EGR2</i>       | G/A                | 0.311    | 0.372       | 0.75 | 0.0041  | 5.0E-05 |
| 6   | 15168274  | rs9396569   | <i>JARID2</i>            | A/G                | 0.143    | 0.107       | 1.48 | 0.0057  | 7.2E-05 |
| 19  | 10526854  | rs34953890  | <i>CDC37/TYK2</i>        | A/C                | 0.170    | 0.220       | 0.71 | 0.0070  | 9.2E-05 |
| 10  | 128935768 | rs12263483  | <i>DOCK1/FAM196A</i>     | G/A                | 0.101    | 0.142       | 0.67 | 0.0075  | 9.9E-05 |

Top SNP (or SNPs if independent) from each locus with at least one variant with  $P < 1 \times 10^{-4}$

Loci forwarded for replication are indicated in bold

**Supplementary Table S9.** Single variant SLE case-control association analysis in the Norwegian and Danish replication cohorts, and Scandinavian cohorts meta-analysis.

| CHR | BP       | SNV               | Gene region       | Norway  |          |            |         | Denmark |          |            |         | Meta-analysis Scandinavia |             |         |                |
|-----|----------|-------------------|-------------------|---------|----------|------------|---------|---------|----------|------------|---------|---------------------------|-------------|---------|----------------|
|     |          |                   |                   | MAF SLE | MAF Ctrl | Odds ratio | P-value | MAF SLE | MAF Ctrl | Odds ratio | P-value | Odds ratio (R)            | P-value (R) | Q       | I <sup>2</sup> |
| 2   | 30957326 | rs2276568         | <i>CAPN13</i>     | 0.081   | 0.063    | 1.32       | 0.19    | 0.080   | 0.061    | 1.33       | 0.067   | 1.03                      | 0.93        | 0.00010 | 89             |
| 2   | 30961022 | <b>rs55799526</b> | <i>CAPN13</i>     | 0.081   | 0.061    | 1.38       | 0.13    | 0.081   | 0.061    | 1.37       | 0.045   | 1.05                      | 0.85        | 0.00010 | 90             |
| 2   | 30964632 | rs72783018        | <i>CAPN13</i>     | 0.087   | 0.064    | 1.37       | 0.12    | 0.075   | 0.063    | 1.22       | 0.21    | 1.06                      | 0.74        | 0.012   | 77             |
| 2   | 30967587 | rs72783020        | <i>CAPN13</i>     | 0.087   | 0.063    | 1.41       | 0.093   | 0.078   | 0.063    | 1.27       | 0.13    | 1.08                      | 0.70        | 0.0045  | 81             |
| 9   | 27482627 | rs4879517         | <i>MOB3B</i>      | 0.052   | 0.042    | 1.25       | 0.39    | 0.047   | 0.036    | 1.30       | 0.18    | 0.90                      | 0.77        | 0       | 90             |
| 9   | 27483959 | <b>rs895023</b>   | <i>MOB3B</i>      | 0.052   | 0.051    | 1.01       | 0.96    | 0.047   | 0.037    | 1.26       | 0.23    | 0.83                      | 0.58        | 0.00020 | 88             |
| 9   | 27489047 | rs78313606        | <i>MOB3B</i>      | 0.047   | 0.041    | 1.15       | 0.59    | 0.034   | 0.033    | 1.04       | 0.87    | 0.82                      | 0.49        | 0.0034  | 82             |
| 9   | 27489418 | rs76324761        | <i>MOB3B</i>      | 0.047   | 0.041    | 1.15       | 0.59    | 0.034   | 0.033    | 1.04       | 0.87    | 0.82                      | 0.49        | 0.0032  | 83             |
| 9   | 27498800 | rs1031154         | <i>IFNK/MOB3B</i> | 0.054   | 0.042    | 1.30       | 0.30    | 0.046   | 0.038    | 1.21       | 0.32    | 0.91                      | 0.78        | 0.00030 | 88             |
| 9   | 27502986 | rs1977661         | <i>IFNK/MOB3B</i> | 0.087   | 0.092    | 0.93       | 0.70    | 0.088   | 0.092    | 0.95       | 0.70    | 0.96                      | 0.63        | 0.96    | 0              |
| 12  | 96374750 | rs2270318         | <i>HAL</i>        | 0.39    | 0.36     | 1.16       | 0.18    | 0.42    | 0.41     | 1.05       | 0.54    | 1.15                      | 0.0014      | 0.39    | 0              |

Top SLE associated SNVs from the Swedish SLE case-control cohort are indicated in bold. The the top SNV in *HAL* (rs6538696) failed genotyping.

Scandinavia meta-analysis included 1,794 SLE patients and 3,241 control individuals from Sweden, Norway and Denmark.

Random-effects meta-analysis (R) p-values and odds ratio estimates are shown.

MAF= Minor allele frequency, Q= P-value for Cochran's Q statistic, I<sup>2</sup>= I2 heterogeneity index (0-100 scale).

Supplementary Table S10. Rare non-synonymous variants in genes for monogenic SLE and lupus-like disease.

| CHR | BP        | SNV            | REF | ALT | Gene name       | Consequence      | Amino acid change | SLE (N=958)        |         |                           |                     | Controls (N=1026)  |         |                           |                     |
|-----|-----------|----------------|-----|-----|-----------------|------------------|-------------------|--------------------|---------|---------------------------|---------------------|--------------------|---------|---------------------------|---------------------|
|     |           |                |     |     |                 |                  |                   | Minor allele count | MAF     | Count homozygous allele 1 | Count heterozygotes | Minor allele count | MAF     | Count homozygous allele 1 | Count heterozygotes |
| 1   | 22965341  | rs772544683    | G   | A   | <i>C1QA</i>     | missense variant | p.Arg60Gln        | 0                  | 0       | 0                         | 0                   | 1                  | 0.00051 | 0                         | 1                   |
| 1   | 22973825  | chr1:22973825  | C   | G   | <i>C1QC</i>     | missense variant | p.Pro96Arg        | 1                  | 0.00056 | 0                         | 1                   | 0                  | 0       | 0                         | 0                   |
| 1   | 22974053  | rs560156356    | C   | T   | <i>C1QC</i>     | missense variant | p.Ala172Val       | 1                  | 0.00056 | 0                         | 1                   | 0                  | 0       | 0                         | 0                   |
| 1   | 154557500 | chr1:154557500 | G   | A   | <i>ADAR</i>     | missense variant | p.Arg1198Trp      | 0                  | 0       | 0                         | 0                   | 1                  | 0.00049 | 0                         | 1                   |
| 1   | 154562881 | rs145849344    | C   | T   | <i>ADAR</i>     | missense variant | p.Val802Ile       | 0                  | 0       | 0                         | 0                   | 1                  | 0.00049 | 0                         | 1                   |
| 1   | 154570903 | rs17843865     | T   | C   | <i>ADAR</i>     | missense variant | p.Tyr630Cys       | 1                  | 0.00052 | 0                         | 1                   | 0                  | 0       | 0                         | 0                   |
| 1   | 154571009 | rs771516546    | C   | T   | <i>ADAR</i>     | missense variant | p.Gly595Arg       | 0                  | 0       | 0                         | 0                   | 1                  | 0.00049 | 0                         | 1                   |
| 1   | 154573655 | rs748585963    | G   | C   | <i>ADAR</i>     | missense variant | p.Pro531Arg       | 0                  | 0       | 0                         | 0                   | 1                  | 0.00049 | 0                         | 1                   |
| 1   | 154575074 | chr1:154575074 | T   | G   | <i>ADAR</i>     | missense variant | p.His58Pro        | 0                  | 0       | 0                         | 0                   | 1                  | 0.00049 | 0                         | 1                   |
| 1   | 154600474 | rs186420937    | T   | C   | <i>ADAR</i>     | start lost       | p.Met1?           | 4                  | 0.0021  | 0                         | 4                   | 3                  | 0.0015  | 0                         | 3                   |
| 2   | 163124024 | rs144455277    | G   | C   | <i>IFIH1</i>    | missense variant | p.Gln955Glu       | 2                  | 0.0010  | 0                         | 2                   | 5                  | 0.0024  | 0                         | 5                   |
| 2   | 163128887 | rs376048533    | C   | T   | <i>IFIH1</i>    | missense variant | p.Arg822Gln       | 1                  | 0.00052 | 0                         | 1                   | 0                  | 0       | 0                         | 0                   |
| 2   | 163133396 | rs72650663     | G   | A   | <i>IFIH1</i>    | missense variant | p.Thr702Ile       | 4                  | 0.0021  | 0                         | 4                   | 1                  | 0.00049 | 0                         | 1                   |
| 2   | 163134054 | rs774347658    | C   | T   | <i>IFIH1</i>    | missense variant | p.Ala639Thr       | 1                  | 0.00052 | 0                         | 1                   | 0                  | 0       | 0                         | 0                   |
| 2   | 163134090 | rs35744605     | C   | A   | <i>IFIH1</i>    | stop gained      | p.Glu627*         | 8                  | 0.0042  | 0                         | 8                   | 9                  | 0.0044  | 0                         | 9                   |
| 2   | 163134176 | rs200945986    | C   | T   | <i>IFIH1</i>    | missense variant | p.Arg598His       | 0                  | 0       | 0                         | 0                   | 1                  | 0.00049 | 0                         | 1                   |
| 2   | 163136564 | rs142348767    | A   | C   | <i>IFIH1</i>    | missense variant | p.Leu528Arg       | 1                  | 0.00052 | 0                         | 1                   | 0                  | 0       | 0                         | 0                   |
| 2   | 163137999 | rs772981550    | T   | C   | <i>IFIH1</i>    | missense variant | p.Asn455Asp       | 0                  | 0       | 0                         | 0                   | 2                  | 0.00097 | 0                         | 2                   |
| 2   | 163138050 | rs139714761    | A   | G   | <i>IFIH1</i>    | missense variant | p.Ser438Pro       | 0                  | 0       | 0                         | 0                   | 1                  | 0.00049 | 0                         | 1                   |
| 2   | 163144659 | rs775244788    | C   | T   | <i>IFIH1</i>    | missense variant | p.Val361Ile       | 1                  | 0.00052 | 0                         | 1                   | 0                  | 0       | 0                         | 0                   |
| 2   | 163144674 | rs150317197    | G   | T   | <i>IFIH1</i>    | missense variant | p.Pro356Thr       | 1                  | 0.00052 | 0                         | 1                   | 1                  | 0.00049 | 0                         | 1                   |
| 2   | 163144694 | rs72650664     | T   | C   | <i>IFIH1</i>    | missense variant | p.Lys349Arg       | 4                  | 0.0021  | 0                         | 4                   | 0                  | 0       | 0                         | 0                   |
| 2   | 163163228 | chr2:163163228 | C   | T   | <i>IFIH1</i>    | missense variant | p.Val254Ile       | 1                  | 0.00052 | 0                         | 1                   | 0                  | 0       | 0                         | 0                   |
| 2   | 163167419 | rs74162075     | T   | C   | <i>IFIH1</i>    | missense variant | p.Asn160Asp       | 2                  | 0.0011  | 0                         | 2                   | 4                  | 0.0020  | 0                         | 4                   |
| 2   | 163174487 | rs760903088    | G   | T   | <i>IFIH1</i>    | missense variant | p.His111Asn       | 1                  | 0.00052 | 0                         | 1                   | 0                  | 0       | 0                         | 0                   |
| 2   | 163174615 | chr2:163174615 | T   | C   | <i>IFIH1</i>    | missense variant | p.Lys68Arg        | 1                  | 0.00053 | 0                         | 1                   | 0                  | 0       | 0                         | 0                   |
| 3   | 48508028  | rs749323787    | G   | A   | <i>TREX1</i>    | missense variant | p.Gly47Ser        | 1                  | 0.00056 | 0                         | 1                   | 0                  | 0       | 0                         | 0                   |
| 3   | 48508962  | rs765487310    | C   | T   | <i>TREX1</i>    | missense variant | p.Thr358Ile       | 1                  | 0.00053 | 0                         | 1                   | 0                  | 0       | 0                         | 0                   |
| 3   | 53213596  | rs376358631    | G   | A   | <i>PRKCD</i>    | missense variant | p.Arg40His        | 1                  | 0.00055 | 0                         | 1                   | 0                  | 0       | 0                         | 0                   |
| 3   | 53217499  | chr3:53217499  | C   | T   | <i>PRKCD</i>    | missense variant | p.Pro230Leu       | 1                  | 0.00055 | 0                         | 1                   | 0                  | 0       | 0                         | 0                   |
| 3   | 53223210  | rs146289210    | C   | T   | <i>PRKCD</i>    | missense variant | p.Thr564Met       | 1                  | 0.00054 | 0                         | 1                   | 1                  | 0.00050 | 0                         | 1                   |
| 3   | 58179012  | rs766661698    | C   | T   | <i>DNASE1L3</i> | missense variant | p.Ala287Thr       | 1                  | 0.00052 | 0                         | 1                   | 1                  | 0.00049 | 0                         | 1                   |
| 3   | 58191230  | rs12491947     | G   | T   | <i>DNASE1L3</i> | missense variant | p.Asn96Lys        | 9                  | 0.0047  | 0                         | 9                   | 5                  | 0.0024  | 0                         | 5                   |
| 3   | 58191274  | rs74350392     | C   | G   | <i>DNASE1L3</i> | missense variant | p.Gly82Arg        | 8                  | 0.0042  | 0                         | 8                   | 13                 | 0.0063  | 0                         | 13                  |
| 6   | 31901976  | rs150827255    | C   | G   | <i>C2</i>       | missense variant | p.Ser250Cys       | 1                  | 0.00052 | 0                         | 1                   | 0                  | 0       | 0                         | 0                   |

|    |          |                |   |   |          |                       |              |    |         |   |    |    |         |   |    |
|----|----------|----------------|---|---|----------|-----------------------|--------------|----|---------|---|----|----|---------|---|----|
| 6  | 31911055 | rs142243595    | G | A | C2       | missense variant      | p.Ala472Thr  | 0  | 0       | 0 | 0  | 1  | 0.00049 | 0 | 1  |
| 6  | 31912523 | rs36221133     | T | C | C2       | missense variant      | p.Val641Ala  | 10 | 0.0052  | 0 | 10 | 17 | 0.0083  | 0 | 17 |
| 6  | 31996241 | rs764056735    | G | A | C4B      | missense variant      | p.Met1054Ile | 0  | 0       | 0 | 0  | 2  | 0.0010  | 1 | 0  |
| 6  | 31996773 | rs781626894    | A | G | C4B      | missense variant      | p.Ile1147Val | 0  | 0       | 0 | 0  | 1  | 0.00050 | 0 | 1  |
| 6  | 32810551 | chr6:32810551  | C | A | PSMB8    | missense variant      | p.Arg102Leu  | 0  | 0       | 0 | 0  | 1  | 0.00049 | 0 | 1  |
| 6  | 32810794 | rs17220206     | T | A | PSMB8    | missense variant      | p.Thr74Ser   | 2  | 0.0010  | 0 | 2  | 1  | 0.00049 | 0 | 1  |
| 9  | 32457245 | rs138425677    | G | A | DDX58    | missense variant      | p.Pro885Ser  | 3  | 0.0016  | 0 | 3  | 0  | 0       | 0 | 0  |
| 9  | 32472997 | rs139726764    | G | A | DDX58    | missense variant      | p.Arg664Cys  | 1  | 0.00053 | 0 | 1  | 0  | 0       | 0 | 0  |
| 9  | 32480284 | chr9:32480284  | G | C | DDX58    | missense variant      | p.Asp569Glu  | 1  | 0.00052 | 0 | 1  | 0  | 0       | 0 | 0  |
| 9  | 32481339 | rs61752945     | C | T | DDX58    | splice region variant | p.Arg546Gln  | 11 | 0.0057  | 0 | 11 | 14 | 0.0068  | 0 | 14 |
| 9  | 32500832 | rs72710678     | C | T | DDX58    | missense variant      | p.Arg71His   | 22 | 0.011   | 0 | 22 | 13 | 0.0063  | 0 | 13 |
| 9  | 32526076 | rs147964586    | G | A | DDX58    | missense variant      | p.Ala30Val   | 1  | 0.00052 | 0 | 1  | 0  | 0       | 0 | 0  |
| 10 | 90771767 | rs56006128     | G | A | FAS      | missense variant      | p.Glu194Lys  | 4  | 0.0022  | 0 | 4  | 1  | 0.00050 | 0 | 1  |
| 11 | 36595579 | rs76897604     | A | G | RAG1     | missense variant      | p.Gln242Arg  | 14 | 0.0073  | 0 | 14 | 17 | 0.0084  | 0 | 17 |
| 11 | 36596695 | chr11:36596695 | G | A | RAG1     | missense variant      | p.Ser614Asn  | 0  | 0       | 0 | 0  | 1  | 0.00049 | 0 | 1  |
| 11 | 36597492 | rs4151033      | G | A | RAG1     | missense variant      | p.Glu880Lys  | 5  | 0.0026  | 0 | 5  | 0  | 0       | 0 | 0  |
| 11 | 36597513 | rs4151034      | G | A | RAG1     | missense variant      | p.Asp887Asn  | 10 | 0.0052  | 0 | 10 | 13 | 0.0064  | 1 | 11 |
| 11 | 36597870 | rs139113046    | A | G | RAG1     | missense variant      | p.Met1006Val | 11 | 0.0057  | 0 | 11 | 15 | 0.0073  | 0 | 15 |
| 11 | 36614202 | rs144812762    | C | T | RAG2     | missense variant      | p.Arg506His  | 0  | 0       | 0 | 0  | 1  | 0.00049 | 0 | 1  |
| 11 | 36614521 | rs140682926    | C | G | RAG2     | missense variant      | p.Asp400His  | 1  | 0.00052 | 0 | 1  | 7  | 0.0034  | 0 | 7  |
| 11 | 36614574 | chr11:36614574 | T | G | RAG2     | missense variant      | p.Glu382Ala  | 0  | 0       | 0 | 0  | 1  | 0.00049 | 0 | 1  |
| 11 | 36614910 | rs149241274    | T | C | RAG2     | missense variant      | p.Glu270Gly  | 1  | 0.00052 | 0 | 1  | 0  | 0       | 0 | 0  |
| 11 | 65487283 | chr11:65487283 | G | C | RNASEH2C | missense variant      | p.Ala234Gly  | 1  | 0.00053 | 0 | 1  | 0  | 0       | 0 | 0  |
| 11 | 65487341 | chr11:65487341 | T | C | RNASEH2C | missense variant      | p.Met215Val  | 1  | 0.00053 | 0 | 1  | 0  | 0       | 0 | 0  |
| 11 | 65487503 | rs182000627    | C | T | RNASEH2C | missense variant      | p.Gly161Arg  | 3  | 0.0017  | 0 | 3  | 0  | 0       | 0 | 0  |
| 11 | 65487511 | rs753880827    | C | G | RNASEH2C | missense variant      | p.Ser158Thr  | 1  | 0.00056 | 0 | 1  | 0  | 0       | 0 | 0  |
| 12 | 7173211  | rs781960849    | A | G | C1S      | missense variant      | p.Ile270Val  | 1  | 0.00052 | 0 | 1  | 0  | 0       | 0 | 0  |
| 12 | 7173893  | rs117907409    | G | A | C1S      | missense variant      | p.Asp315Asn  | 3  | 0.0016  | 0 | 3  | 6  | 0.0029  | 0 | 6  |
| 12 | 7175028  | rs20573        | G | A | C1S      | missense variant      | p.Arg383His  | 2  | 0.0010  | 0 | 2  | 0  | 0       | 0 | 0  |
| 12 | 7175824  | rs139493862    | A | C | C1S      | missense variant      | p.Lys420Asn  | 0  | 0       | 0 | 0  | 1  | 0.00049 | 0 | 1  |
| 12 | 7177488  | rs121909582    | C | T | C1S      | missense variant      | p.Arg534Trp  | 1  | 0.00052 | 0 | 1  | 0  | 0       | 0 | 0  |
| 12 | 7241211  | rs117402032    | T | G | C1R      | missense variant      | p.Ile344Leu  | 1  | 0.00052 | 0 | 1  | 0  | 0       | 0 | 0  |
| 12 | 7242740  | rs139531404    | C | G | C1R      | missense variant      | p.Met111Ile  | 5  | 0.0026  | 0 | 5  | 10 | 0.0049  | 0 | 10 |
| 16 | 3705479  | rs34907394     | G | C | DNASE1   | missense variant      | p.Glu35Asp   | 6  | 0.0034  | 0 | 6  | 3  | 0.0016  | 0 | 3  |
| 16 | 3705900  | rs755091005    | C | G | DNASE1   | missense variant      | p.His66Gln   | 1  | 0.0006  | 0 | 1  | 0  | 0       | 0 | 0  |
| 16 | 3706754  | chr16:3706754  | G | C | DNASE1   | splice region variant | p.Glu146Gln  | 0  | 0       | 0 | 0  | 1  | 0.00051 | 0 | 1  |
| 16 | 3707066  | rs150933932    | C | T | DNASE1   | missense variant      | p.Ala168Val  | 5  | 0.0028  | 0 | 5  | 7  | 0.0036  | 0 | 7  |
| 16 | 3707191  | rs74892550     | G | A | DNASE1   | missense variant      | p.Val185Ile  | 0  | 0       | 0 | 0  | 11 | 0.0056  | 0 | 11 |
| 16 | 3707341  | rs139254891    | A | T | DNASE1   | splice region variant | p.Arg235Trp  | 1  | 0.00056 | 0 | 1  | 0  | 0       | 0 | 0  |

|    |          |               |   |   |          |                                             |              |    |         |   |    |   |         |   |   |
|----|----------|---------------|---|---|----------|---------------------------------------------|--------------|----|---------|---|----|---|---------|---|---|
| 19 | 6678454  | rs778590435   | C | T | C3       | missense variant                            | p.Arg1548Gln | 1  | 0.00054 | 0 | 1  | 0 | 0       | 0 | 0 |
| 19 | 6697719  | rs771305132   | C | T | C3       | missense variant                            | p.Glu843Lys  | 1  | 0.00053 | 0 | 1  | 0 | 0       | 0 | 0 |
| 19 | 6711182  | rs532944249   | G | A | C3       | missense variant                            | p.Ser432Leu  | 0  | 0       | 0 | 0  | 1 | 0.00052 | 0 | 1 |
| 19 | 6719341  | rs780548430   | G | C | C3       | missense variant                            | p.Gln50Glu   | 1  | 0.00057 | 0 | 1  | 0 | 0       | 0 | 0 |
| 19 | 11685942 | rs147115345   | G | A | ACP5     | missense variant                            | p.Thr45Ile   | 1  | 0.00055 | 0 | 1  | 3 | 0.0015  | 0 | 3 |
| 19 | 11685989 | rs147025508   | G | A | ACP5     | missense variant                            | p.Arg272Cys  | 10 | 0.0055  | 0 | 10 | 7 | 0.0036  | 0 | 7 |
| 19 | 11686037 | rs146196342   | C | G | ACP5     | missense variant                            | p.Val256Leu  | 2  | 0.0011  | 0 | 2  | 1 | 0.00051 | 0 | 1 |
| 19 | 11687621 | rs141651325   | C | T | ACP5     | missense variant                            | p.Arg100His  | 0  | 0       | 0 | 0  | 1 | 0.00051 | 0 | 1 |
| 19 | 11687630 | rs777140546   | C | T | ACP5     | missense variant                            | p.Arg97His   | 0  | 0       | 0 | 0  | 1 | 0.00051 | 0 | 1 |
| 19 | 11688072 | rs757630659   | C | G | ACP5     | missense variant                            | p.Gly21Arg   | 1  | 0.00057 | 0 | 1  | 0 | 0       | 0 | 0 |
| 19 | 12918104 | rs754727728   | T | C | RNASEH2A | missense variant                            | p.Val95Ala   | 0  | 0       | 0 | 0  | 1 | 0.00049 | 0 | 1 |
| 19 | 12920928 | rs757486362   | G | A | RNASEH2A | missense variant                            | p.Arg152Gln  | 0  | 0       | 0 | 0  | 2 | 0.00098 | 0 | 2 |
| 19 | 12921196 | rs62619782    | T | A | RNASEH2A | missense variant                            | p.Asp205Glu  | 12 | 0.0063  | 0 | 12 | 8 | 0.0039  | 0 | 8 |
| 19 | 12921216 | rs377244188   | A | T | RNASEH2A | missense variant &<br>splice region variant | p.Asn212Ile  | 1  | 0.00052 | 0 | 1  | 2 | 0.00098 | 0 | 2 |
| 19 | 12923974 | rs372667206   | C | T | RNASEH2A | missense variant                            | p.Arg239Cys  | 1  | 0.00053 | 0 | 1  | 2 | 0.00097 | 0 | 2 |
| X  | 37658266 | chrX:37658266 | G | A | CYBB     | missense variant                            | p.Glu245Lys  | 0  | 0       | 0 | 0  | 1 | 0.00053 | 0 | 1 |
| X  | 37663322 | rs141756032   | G | C | CYBB     | missense variant                            | p.Gly364Arg  | 8  | 0.0045  | 0 | 8  | 9 | 0.0048  | 0 | 9 |

MAF: Minor Allele Frequency

**Supplementary Table S11.** SLE case-only non-synonymous variants. These are missense or nonsense SNVs observed in at least one SLE patient, but not in the control population or in external sets of control individuals of similar ancestry (SweGen and GnomAD: European non-Finnish controls; Ameur et al. 2017, Karczewski et al. 2019)

| CHR | BP        | SNV             | Minor allele | Major allele | SLE (n=958)        |                        | Gene name       | Consequence                                             | Amino acid change |
|-----|-----------|-----------------|--------------|--------------|--------------------|------------------------|-----------------|---------------------------------------------------------|-------------------|
|     |           |                 |              |              | Minor allele count | Minor allele frequency |                 |                                                         |                   |
| 11  | 1266280   | rs773068050     | C            | A            | 5                  | 0.0028                 | <i>MUC5B</i>    | missense variant                                        | p.Thr2727Pro      |
| 1   | 186363103 | chr1:186363103  | A            | C            | 4                  | 0.0023                 | <i>C1orf27</i>  | missense variant                                        | p.Gln246Lys       |
| 1   | 151342270 | rs772030489     | T            | G            | 2                  | 0.0011                 | <i>SELENBP1</i> | missense variant                                        | p.Pro36Thr        |
| 2   | 27455971  | rs776014297     | A            | T            | 2                  | 0.0010                 | <i>CAD</i>      | missense variant                                        | p.Met922Lys       |
| 2   | 179698928 | chr2:179698928  | A            | G            | 2                  | 0.0010                 | <i>CCDC141</i>  | missense variant                                        | p.Ser1522Phe      |
| 9   | 16431447  | chr9:16431447   | A            | G            | 2                  | 0.0011                 | <i>BNC2</i>     | missense variant                                        | p.His307Tyr       |
| 9   | 21166175  | rs779242420     | C            | T            | 2                  | 0.0010                 | <i>IFNA21</i>   | missense variant                                        | p.Tyr146Cys       |
| 10  | 75583821  | chr10:75583821  | T            | G            | 2                  | 0.0011                 | <i>CAMK2G</i>   | missense variant                                        | p.His370Asn       |
| 12  | 6458353   | rs775543049     | A            | G            | 2                  | 0.0010                 | <i>SCNN1A</i>   | stop gained                                             | p.Arg551*         |
| 12  | 48482728  | rs750735162     | C            | T            | 2                  | 0.0010                 | <i>SENP1</i>    | missense variant                                        | p.Thr79Ala        |
| 12  | 56350882  | chr12:56350882  | T            | G            | 2                  | 0.0010                 | <i>PMEL</i>     | missense variant                                        | p.Pro402His       |
| 12  | 129190793 | chr12:129190793 | G            | C            | 2                  | 0.0011                 | <i>TMEM132C</i> | missense variant                                        | p.Pro1094Ala      |
| 14  | 23057866  | chr14:23057866  | T            | A            | 2                  | 0.0010                 | <i>DAD1</i>     | missense variant                                        | p.Ser66Arg        |
| 15  | 91030272  | rs181919733     | A            | G            | 2                  | 0.0010                 | <i>IQGAP1</i>   | missense variant                                        | p.Val1371Met      |
| 17  | 41143320  | chr17:41143320  | A            | G            | 2                  | 0.0011                 | <i>RUNDC1</i>   | missense variant                                        | p.Val477Ile       |
| 19  | 4891395   | rs139019426     | C            | T            | 2                  | 0.0010                 | <i>ARRDC5</i>   | missense variant                                        | p.Gln231Arg       |
| 19  | 18273781  | rs777121279     | A            | G            | 2                  | 0.0011                 | <i>PIK3R2</i>   | missense variant                                        | p.Gly372Ser       |
| 19  | 55240959  | rs764066889     | A            | G            | 2                  | 0.0010                 | <i>KIR3DL3</i>  | splice region variant                                   | p.Gly219Asp       |
| 1   | 905700    | rs759355675     | G            | C            | 1                  | 0.00056                | <i>PLEKHN1</i>  | missense variant<br>stop gained & splice region variant | p.Pro76Arg        |
| 1   | 1246066   | chr1:1246066    | T            | C            | 1                  | 0.00055                | <i>PUSL1</i>    | region variant                                          | p.Gln233*         |
| 1   | 3739745   | rs148840465     | T            | C            | 1                  | 0.00052                | <i>CEP104</i>   | missense variant                                        | p.Gly855Glu       |
| 1   | 6529607   | rs781318885     | C            | G            | 1                  | 0.00055                | <i>PLEKHG5</i>  | missense variant                                        | p.Pro723Ala       |
| 1   | 6535129   | chr1:6535129    | A            | C            | 1                  | 0.00055                | <i>PLEKHG5</i>  | missense variant                                        | p.Ala173Ser       |
| 1   | 6589075   | rs147263684     | C            | T            | 1                  | 0.00052                | <i>NOL9</i>     | missense variant                                        | p.Ile602Val       |
| 1   | 7798073   | rs778503877     | G            | A            | 1                  | 0.00052                | <i>CAMTA1</i>   | missense variant                                        | p.Lys1238Arg      |
| 1   | 7812557   | rs369220323     | A            | G            | 1                  | 0.00052                | <i>CAMTA1</i>   | missense variant                                        | p.Arg1641Gln      |
| 1   | 7837316   | chr1:7837316    | T            | G            | 1                  | 0.00052                | <i>VAMP3</i>    | missense variant                                        | p.Ala57Ser        |
| 1   | 7879456   | chr1:7879456    | C            | T            | 1                  | 0.00052                | <i>PER3</i>     | missense variant                                        | p.Ile545Thr       |
| 1   | 8075450   | chr1:8075450    | G            | A            | 1                  | 0.00052                | <i>ERRF1</i>    | missense variant                                        | p.Phe46Leu        |
| 1   | 8399719   | chr1:8399719    | T            | G            | 1                  | 0.00053                | <i>SLC45A1</i>  | missense variant                                        | p.Leu681Phe       |
| 1   | 8424007   | rs778046482     | C            | T            | 1                  | 0.00056                | <i>RERE</i>     | missense variant                                        | p.Lys134Glu       |
| 1   | 9786994   | chr1:9786994    | A            | G            | 1                  | 0.00052                | <i>PIK3CD</i>   | missense variant                                        | p.Glu1033Lys      |
| 1   | 10195185  | rs138056371     | G            | A            | 1                  | 0.00052                | <i>UBE4B</i>    | missense variant                                        | p.Asn722Ser       |
| 1   | 10386339  | rs141942131     | T            | C            | 1                  | 0.00052                | <i>KIF1B</i>    | missense variant                                        | p.Thr949Met       |
| 1   | 10523664  | chr1:10523664   | A            | G            | 1                  | 0.00054                | <i>DFFA</i>     | missense variant                                        | p.Ala152Val       |
| 1   | 11090845  | chr1:11090845   | C            | G            | 1                  | 0.00052                | <i>MASP2</i>    | stop gained                                             | p.Tyr394*         |
| 1   | 11169772  | chr1:11169772   | G            | C            | 1                  | 0.00052                | <i>MTOR</i>     | missense variant                                        | p.Val2461Leu      |
| 1   | 11255025  | chr1:11255025   | G            | C            | 1                  | 0.00052                | <i>ANGPTL7</i>  | missense variant                                        | p.Thr329Ser       |
| 1   | 12336842  | chr1:12336842   | A            | T            | 1                  | 0.00052                | <i>VPS13D</i>   | missense variant                                        | p.Val1066Asp      |
| 1   | 12337649  | chr1:12337649   | C            | A            | 1                  | 0.00052                | <i>VPS13D</i>   | missense variant                                        | p.Glu1335Ala      |
| 1   | 12359263  | chr1:12359263   | A            | G            | 1                  | 0.00052                | <i>VPS13D</i>   | missense variant                                        | p.Arg2013Lys      |
| 1   | 15855646  | chr1:15855646   | A            | C            | 1                  | 0.00052                | <i>DNAJC16</i>  | missense variant                                        | p.Leu16Met        |
| 1   | 15892647  | rs61738974      | A            | G            | 1                  | 0.00052                | <i>DNAJC16</i>  | missense variant                                        | p.Glu584Lys       |
| 1   | 16260959  | chr1:16260959   | C            | A            | 1                  | 0.00057                | <i>SPEN</i>     | missense variant                                        | p.Thr2742Pro      |
| 1   | 17277609  | rs757471392     | T            | C            | 1                  | 0.00053                | <i>CROCC</i>    | missense variant                                        | p.Arg1000Cys      |
| 1   | 19566385  | chr1:19566385   | A            | T            | 1                  | 0.00052                | <i>EMC1</i>     | missense variant                                        | p.His294Leu       |
| 1   | 21952859  | rs768044335     | C            | G            | 1                  | 0.00052                | <i>RAP1GAP</i>  | missense variant                                        | p.Gln38Glu        |
| 1   | 22062929  | chr1:22062929   | G            | A            | 1                  | 0.00052                | <i>USP48</i>    | missense variant                                        | p.Phe109Ser       |
| 1   | 22078025  | chr1:22078025   | A            | G            | 1                  | 0.00052                | <i>USP48</i>    | missense variant                                        | p.Thr250Ile       |
| 1   | 22329533  | chr1:22329533   | A            | C            | 1                  | 0.00054                | <i>CELA3A</i>   | missense variant                                        | p.Ser27Arg        |
| 1   | 22973825  | chr1:22973825   | G            | C            | 1                  | 0.00056                | <i>C1QC</i>     | missense variant                                        | p.Pro96Arg        |
| 1   | 24409181  | rs148441250     | A            | G            | 1                  | 0.00052                | <i>MYOM3</i>    | missense variant                                        | p.Thr666Met       |
| 1   | 24484263  | chr1:24484263   | T            | C            | 1                  | 0.00053                | <i>IFNLR1</i>   | missense variant                                        | p.Arg307Gln       |
| 1   | 25166361  | chr1:25166361   | C            | G            | 1                  | 0.00052                | <i>CLIC4</i>    | missense variant                                        | p.Arg142Ser       |
| 1   | 26784313  | chr1:26784313   | T            | C            | 1                  | 0.00052                | <i>DHDDS</i>    | missense variant                                        | p.Leu192Phe       |
| 1   | 26870645  | chr1:26870645   | G            | C            | 1                  | 0.00052                | <i>RPS6KA1</i>  | missense variant                                        | p.Pro47Arg        |
| 1   | 26900915  | rs755547404     | A            | G            | 1                  | 0.00054                | <i>RPS6KA1</i>  | missense variant                                        | p.Cys110Tyr       |
| 1   | 27734810  | rs200665850     | T            | C            | 1                  | 0.00052                | <i>WASF2</i>    | missense variant                                        | p.Arg457Gln       |
| 1   | 32098045  | chr1:32098045   | A            | G            | 1                  | 0.00055                | <i>HCRTR1</i>   | missense variant                                        | p.Glu366Lys       |



|   |           |                |   |   |   |         |                  |                  |              |
|---|-----------|----------------|---|---|---|---------|------------------|------------------|--------------|
| 1 | 40038204  | chr1:40038204  | T | C | 1 | 0.00052 | <i>PABPC4</i>    | missense variant | p.Arg83His   |
| 1 | 40125028  | chr1:40125028  | T | C | 1 | 0.00056 | <i>NTSC1A</i>    | missense variant | p.Arg291Gln  |
| 1 | 43719800  | chr1:43719800  | T | G | 1 | 0.00052 | <i>WDR65</i>     | missense variant | p.Ala1231Ser |
| 1 | 43886632  | chr1:43886632  | A | C | 1 | 0.00052 | <i>SZT2</i>      | missense variant | p.Arg492Ser  |
| 1 | 43907384  | chr1:43907384  | G | C | 1 | 0.00053 | <i>SZT2</i>      | missense variant | p.Ala2489Gly |
| 1 | 52840492  | rs767782494    | A | G | 1 | 0.00052 | <i>ORC1</i>      | missense variant | p.Thr794Met  |
| 1 | 52902547  | chr1:52902547  | G | C | 1 | 0.00052 | <i>ZCCHC11</i>   | missense variant | p.Asp1348His |
| 1 | 57378187  | chr1:57378187  | T | C | 1 | 0.00057 | <i>C8A</i>       | stop gained      | p.Arg498*    |
| 1 | 57537275  | chr1:57537275  | T | G | 1 | 0.00052 | <i>DAB1</i>      | missense variant | p.Leu160Ile  |
| 1 | 59156063  | rs768128851    | A | G | 1 | 0.00057 | <i>MYSM1</i>     | missense variant | p.Pro82Leu   |
| 1 | 61554274  | chr1:61554274  | G | C | 1 | 0.00052 | <i>NFIA</i>      | missense variant | p.Leu206Val  |
| 1 | 61554329  | chr1:61554329  | G | T | 1 | 0.00052 | <i>NFIA</i>      | missense variant | p.Leu224Trp  |
| 1 | 63870189  | chr1:63870189  | G | A | 1 | 0.00052 | <i>ALG6</i>      | missense variant | p.His108Arg  |
| 1 | 63998360  | rs759233815    | A | G | 1 | 0.00052 | <i>EFCAB7</i>    | missense variant | p.Arg140Gln  |
| 1 | 64104375  | rs751121095    | G | A | 1 | 0.00052 | <i>PGM1</i>      | missense variant | p.Ile368Val  |
| 1 | 65255098  | chr1:65255098  | A | C | 1 | 0.00052 | <i>RAVER2</i>    | missense variant | p.Pro336Thr  |
| 1 | 65273113  | chr1:65273113  | G | A | 1 | 0.00052 | <i>RAVER2</i>    | missense variant | p.Lys546Glu  |
| 1 | 65871673  | chr1:65871673  | A | G | 1 | 0.00056 | <i>DNAJC6</i>    | missense variant | p.Gly783Asp  |
| 1 | 85790511  | rs189798371    | G | A | 1 | 0.00052 | <i>DDAH1</i>     | missense variant | p.Ile218Thr  |
| 1 | 92442693  | chr1:92442693  | G | A | 1 | 0.00053 | <i>BRDT</i>      | missense variant | p.Lys238Glu  |
| 1 | 92469982  | chr1:92469982  | G | T | 1 | 0.00053 | <i>BRDT</i>      | missense variant | p.Ile800Met  |
| 1 | 92979452  | chr1:92979452  | C | T | 1 | 0.00053 | <i>EVI5</i>      | missense variant | p.Ile743Val  |
| 1 | 100756962 | chr1:100756962 | C | A | 1 | 0.00053 | <i>RTCA</i>      | missense variant | p.Lys348Gln  |
| 1 | 100964750 | rs754033815    | C | A | 1 | 0.00052 | <i>CDC14A</i>    | missense variant | p.Thr563Pro  |
| 1 | 109395240 | chr1:109395240 | C | T | 1 | 0.00052 | <i>AKNAD1</i>    | missense variant | p.Asp166Gly  |
| 1 | 109439703 | rs747080388    | A | G | 1 | 0.00052 | <i>GPSM2</i>     | missense variant | p.Ala92Thr   |
| 1 | 112999589 | chr1:112999589 | C | T | 1 | 0.00052 | <i>CTTNBP2NL</i> | missense variant | p.Ile492Thr  |
| 1 | 114267385 | rs747112740    | C | T | 1 | 0.00052 | <i>PHTF1</i>     | missense variant | p.Asn207Asp  |
| 1 | 114483711 | rs747566932    | T | A | 1 | 0.00052 | <i>HIPK1</i>     | missense variant | p.Ser236Cys  |
| 1 | 114942135 | chr1:114942135 | G | C | 1 | 0.00052 | <i>TRIM33</i>    | missense variant | p.Asp1022His |
| 1 | 115110848 | rs762953689    | C | T | 1 | 0.00052 | <i>BCAS2</i>     | missense variant | p.Glu194Gly  |
| 1 | 115238109 | chr1:115238109 | T | G | 1 | 0.00052 | <i>AMPD1</i>     | stop gained      | p.Ser28*     |
| 1 | 115258744 | rs121434596    | T | C | 1 | 0.00052 | <i>NRAS</i>      | missense variant | p.Gly13Asp   |
| 1 | 115261341 | chr1:115261341 | C | G | 1 | 0.00052 | <i>CSDE1</i>     | missense variant | p.Pro794Ala  |
| 1 | 115267874 | rs779445127    | G | A | 1 | 0.00052 | <i>CSDE1</i>     | missense variant | p.Val620Ala  |
| 1 | 117087219 | rs754340222    | C | G | 1 | 0.00054 | <i>CD58</i>      | missense variant | p.Ile26Met   |
| 1 | 120057084 | rs769334806    | T | C | 1 | 0.00052 | <i>HSD3B1</i>    | missense variant | p.Pro315Leu  |
| 1 | 120496238 | chr1:120496238 | C | G | 1 | 0.00052 | <i>NOTCH2</i>    | missense variant | p.Pro765Ala  |
| 1 | 120496289 | chr1:120496289 | G | C | 1 | 0.00052 | <i>NOTCH2</i>    | missense variant | p.Gly748Arg  |
| 1 | 120496295 | chr1:120496295 | G | C | 1 | 0.00052 | <i>NOTCH2</i>    | missense variant | p.Asp746His  |
| 1 | 150675830 | rs144616489    | T | A | 1 | 0.00052 | <i>HORMAD1</i>   | missense variant | p.Ser330Thr  |
| 1 | 150675853 | chr1:150675853 | C | T | 1 | 0.00052 | <i>HORMAD1</i>   | missense variant | p.Asn322Ser  |
| 1 | 150967779 | chr1:150967779 | A | G | 1 | 0.00052 | <i>ANXA9</i>     | missense variant | p.Cys340Tyr  |
| 1 | 151131346 | rs779652424    | A | G | 1 | 0.00055 | <i>TNFAIP8L2</i> | missense variant | p.Arg58His   |
| 1 | 151134560 | rs184513568    | T | C | 1 | 0.00052 | <i>LYSMD1</i>    | missense variant | p.Arg66His   |
| 1 | 151139661 | chr1:151139661 | C | G | 1 | 0.00052 | <i>SCNM1</i>     | missense variant | p.Gln92His   |
| 1 | 151141491 | chr1:151141491 | C | G | 1 | 0.00052 | <i>SCNM1</i>     | missense variant | p.Arg208Pro  |
| 1 | 151260226 | rs751192864    | A | G | 1 | 0.00057 | <i>ZNF687</i>    | missense variant | p.Gly487Ser  |
| 1 | 151378048 | chr1:151378048 | T | G | 1 | 0.00052 | <i>POGZ</i>      | missense variant | p.Pro1155Thr |
| 1 | 151378361 | chr1:151378361 | A | C | 1 | 0.00052 | <i>POGZ</i>      | missense variant | p.Leu1050Phe |
| 1 | 151400443 | chr1:151400443 | T | C | 1 | 0.00052 | <i>POGZ</i>      | missense variant | p.Glu312Lys  |
| 1 | 151747257 | chr1:151747257 | T | C | 1 | 0.00052 | <i>TDRKH</i>     | missense variant | p.Ser521Asn  |
| 1 | 152085433 | rs750586260    | C | T | 1 | 0.00052 | <i>TCHH</i>      | missense variant | p.Tyr87Cys   |
| 1 | 152187890 | chr1:152187890 | A | C | 1 | 0.00055 | <i>HRNR</i>      | missense variant | p.Gly2072Val |
| 1 | 152188572 | rs760657166    | T | A | 1 | 0.00053 | <i>HRNR</i>      | missense variant | p.Tyr1845Asn |
| 1 | 152191367 | chr1:152191367 | T | G | 1 | 0.00055 | <i>HRNR</i>      | missense variant | p.Ser913Tyr  |
| 1 | 152191526 | rs186602563    | G | C | 1 | 0.00053 | <i>HRNR</i>      | missense variant | p.Ser860Thr  |
| 1 | 152191748 | rs761620569    | A | C | 1 | 0.00054 | <i>HRNR</i>      | missense variant | p.Gly786Val  |
| 1 | 152277317 | chr1:152277317 | A | C | 1 | 0.00053 | <i>FLG</i>       | stop gained      | p.Glu3349*   |
| 1 | 152280757 | chr1:152280757 | G | C | 1 | 0.00052 | <i>FLG</i>       | missense variant | p.Gly2202Ala |
| 1 | 152280764 | chr1:152280764 | T | C | 1 | 0.00052 | <i>FLG</i>       | missense variant | p.Gly2200Arg |
| 1 | 152284828 | rs771331527    | A | G | 1 | 0.00053 | <i>FLG</i>       | missense variant | p.Pro845Leu  |
| 1 | 152323225 | chr1:152323225 | C | T | 1 | 0.00052 | <i>FLG2</i>      | missense variant | p.His2346Arg |
| 1 | 154033441 | chr1:154033441 | C | T | 1 | 0.00052 | <i>NUP210L</i>   | missense variant | p.Ile909Val  |
| 1 | 154305114 | chr1:154305114 | A | G | 1 | 0.00052 | <i>ATP8B2</i>    | missense variant | p.Arg210His  |
| 1 | 154317926 | rs752493222    | T | C | 1 | 0.00052 | <i>ATP8B2</i>    | stop gained      | p.Arg900*    |
| 1 | 154403033 | rs576589094    | T | C | 1 | 0.00053 | <i>IL6R</i>      | missense variant | p.Arg137Trp  |
| 1 | 155014081 | rs150822628    | A | G | 1 | 0.00053 | <i>DCST1</i>     | missense variant | p.Arg247His  |
| 1 | 155161981 | chr1:155161981 | C | T | 1 | 0.00052 | <i>MUC1</i>      | missense variant | p.Lys51Arg   |

|   |           |                |   |   |   |         |                 |                  |              |
|---|-----------|----------------|---|---|---|---------|-----------------|------------------|--------------|
| 1 | 155173022 | chr1:155173022 | A | G | 1 | 0.00053 | <i>THBS3</i>    | stop gained      | p.Arg250*    |
| 1 | 155233065 | chr1:155233065 | A | G | 1 | 0.00053 | <i>CLK2</i>     | missense variant | p.Leu482Phe  |
| 1 | 155269913 | rs754454017    | A | T | 1 | 0.00057 | <i>PKLR</i>     | missense variant | p.Ser87Cys   |
| 1 | 155289628 | rs781599688    | G | A | 1 | 0.00052 | <i>FDP5</i>     | missense variant | p.Lys323Arg  |
| 1 | 156621272 | chr1:156621272 | T | C | 1 | 0.00053 | <i>BCAN</i>     | missense variant | p.Pro363Leu  |
| 1 | 156639290 | chr1:156639290 | T | C | 1 | 0.00057 | <i>NES</i>      | missense variant | p.Gly1564Arg |
| 1 | 156706476 | chr1:156706476 | G | C | 1 | 0.00052 | <i>RRNAD1</i>   | missense variant | p.Asn453Lys  |
| 1 | 156785853 | chr1:156785853 | A | G | 1 | 0.00055 | <i>SH2D2A</i>   | missense variant | p.Thr23Ile   |
| 1 | 156917740 | rs766160542    | A | T | 1 | 0.00054 | <i>ARHGEF11</i> | missense variant | p.Glu721Val  |
| 1 | 158151457 | rs770171229    | G | C | 1 | 0.00052 | <i>CD1D</i>     | missense variant | p.Arg92Gly   |
| 1 | 158298796 | chr1:158298796 | A | T | 1 | 0.00052 | <i>CD1B</i>     | missense variant | p.Thr299Ser  |
| 1 | 159019289 | rs747906601    | G | A | 1 | 0.00052 | <i>IFI16</i>    | missense variant | p.His522Arg  |
| 1 | 160064898 | chr1:160064898 | T | C | 1 | 0.00056 | <i>IGSF8</i>    | missense variant | p.Arg68Lys   |
| 1 | 160109762 | chr1:160109762 | T | C | 1 | 0.00053 | <i>ATP1A2</i>   | missense variant | p.Arg1008Trp |
| 1 | 160249951 | chr1:160249951 | C | T | 1 | 0.00052 | <i>DCAF8</i>    | missense variant | p.Lys80Arg   |
| 1 | 160607014 | chr1:160607014 | G | C | 1 | 0.00052 | <i>SLAMF1</i>   | missense variant | p.Val128Leu  |
| 1 | 160806025 | rs191721381    | A | G | 1 | 0.00052 | <i>CD244</i>    | missense variant | p.Pro290Leu  |
| 1 | 160811227 | chr1:160811227 | G | C | 1 | 0.00052 | <i>CD244</i>    | missense variant | p.Arg148Thr  |
| 1 | 160811631 | chr1:160811631 | T | G | 1 | 0.00052 | <i>CD244</i>    | missense variant | p.Pro41Gln   |
| 1 | 161007805 | chr1:161007805 | T | G | 1 | 0.00054 | <i>TSTD1</i>    | missense variant | p.Ala72Asp   |
| 1 | 161007806 | chr1:161007806 | T | C | 1 | 0.00054 | <i>TSTD1</i>    | missense variant | p.Ala72Thr   |
| 1 | 161042555 | chr1:161042555 | T | C | 1 | 0.00054 | <i>PVRL4</i>    | missense variant | p.Gly477Ser  |
| 1 | 161042596 | chr1:161042596 | A | G | 1 | 0.00054 | <i>PVRL4</i>    | missense variant | p.Pro463Leu  |
| 1 | 161089130 | rs754186210    | G | C | 1 | 0.00052 | <i>NIT1</i>     | missense variant | p.Ser102Cys  |
| 1 | 161141739 | rs768971975    | T | C | 1 | 0.00052 | <i>B4GALT3</i>  | missense variant | p.Arg350Gln  |
| 1 | 161199591 | rs771557332    | G | C | 1 | 0.00052 | <i>NR1I3</i>    | missense variant | p.Ser357Thr  |
| 1 | 162473602 | chr1:162473602 | T | C | 1 | 0.00052 | <i>UHMK1</i>    | missense variant | p.Ala271Val  |
| 1 | 167815473 | rs145191438    | T | C | 1 | 0.00052 | <i>ADCY10</i>   | missense variant | p.Met822Ile  |
| 1 | 169492469 | rs756397912    | C | T | 1 | 0.00052 | <i>F5</i>       | missense variant | p.Gln2010Arg |
| 1 | 173839561 | rs779871322    | A | G | 1 | 0.00052 | <i>ZBTB37</i>   | missense variant | p.Met66Ile   |
| 1 | 173916519 | rs758524800    | C | T | 1 | 0.00052 | <i>RC3H1</i>    | missense variant | p.Ile909Val  |
| 1 | 173930952 | chr1:173930952 | G | C | 1 | 0.00052 | <i>RC3H1</i>    | missense variant | p.Val705Leu  |
| 1 | 179347845 | rs150327590    | G | T | 1 | 0.00052 | <i>AXDND1</i>   | missense variant | p.Leu150Val  |
| 1 | 182555619 | chr1:182555619 | C | A | 1 | 0.00052 | <i>RNASEL</i>   | missense variant | p.Leu108Arg  |
| 1 | 182616021 | chr1:182616021 | A | G | 1 | 0.00052 | <i>RGS8</i>     | missense variant | p.Thr149Met  |
| 1 | 183253860 | chr1:183253860 | C | G | 1 | 0.00052 | <i>NMNAT2</i>   | missense variant | p.Arg172Gly  |
| 1 | 183495785 | rs374677970    | C | T | 1 | 0.00052 | <i>SMG7</i>     | missense variant | p.Ser123Pro  |
| 1 | 183536080 | rs762173491    | T | C | 1 | 0.00052 | <i>NCF2</i>     | missense variant | p.Arg300Gln  |
| 1 | 185964009 | rs751427036    | T | A | 1 | 0.00052 | <i>HMCN1</i>    | missense variant | p.Ile1190Phe |
| 1 | 186024782 | chr1:186024782 | G | A | 1 | 0.00052 | <i>HMCN1</i>    | missense variant | p.Lys2374Glu |
| 1 | 186037025 | chr1:186037025 | A | C | 1 | 0.00052 | <i>HMCN1</i>    | missense variant | p.Leu2589Ile |
| 1 | 186064381 | chr1:186064381 | T | C | 1 | 0.00052 | <i>HMCN1</i>    | missense variant | p.Pro3434Leu |
| 1 | 186097361 | chr1:186097361 | T | G | 1 | 0.00052 | <i>HMCN1</i>    | missense variant | p.Cys4281Phe |
| 1 | 186113673 | rs781091193    | G | A | 1 | 0.00052 | <i>HMCN1</i>    | missense variant | p.Lys4702Glu |
| 1 | 186120434 | rs774497609    | G | A | 1 | 0.00052 | <i>HMCN1</i>    | missense variant | p.Asp4904Gly |
| 1 | 186143771 | rs533893133    | G | A | 1 | 0.00052 | <i>HMCN1</i>    | missense variant | p.Met5314Val |
| 1 | 186147655 | rs144069476    | A | G | 1 | 0.00052 | <i>HMCN1</i>    | missense variant | p.Gly5351Arg |
| 1 | 186158805 | chr1:186158805 | T | C | 1 | 0.00052 | <i>HMCN1</i>    | missense variant | p.Thr5568Ile |
| 1 | 186329113 | chr1:186329113 | A | C | 1 | 0.00052 | <i>TPR</i>      | missense variant | p.Val403Leu  |
| 1 | 196696064 | chr1:196696064 | C | T | 1 | 0.00052 | <i>CFH</i>      | missense variant | p.Cys744Arg  |
| 1 | 196715020 | chr1:196715020 | G | T | 1 | 0.00052 | <i>CFH</i>      | stop gained      | p.Tyr1128*   |
| 1 | 198671570 | chr1:198671570 | T | C | 1 | 0.00052 | <i>PTPRC</i>    | missense variant | p.Pro165Leu  |
| 1 | 198678842 | chr1:198678842 | G | A | 1 | 0.00058 | <i>PTPRC</i>    | missense variant | p.Ile354Val  |
| 1 | 200801885 | chr1:200801885 | G | A | 1 | 0.00053 | <i>CAMSAP2</i>  | missense variant | p.Gln291Arg  |
| 1 | 200946014 | chr1:200946014 | A | G | 1 | 0.00057 | <i>KIF21B</i>   | missense variant | p.Pro1445Ser |
| 1 | 201012602 | chr1:201012602 | T | G | 1 | 0.00052 | <i>CACNA1S</i>  | missense variant | p.Pro1619Thr |
| 1 | 201013544 | rs762847052    | C | A | 1 | 0.00055 | <i>CACNA1S</i>  | missense variant | p.Ile1570Ser |
| 1 | 201020206 | chr1:201020206 | A | G | 1 | 0.00053 | <i>CACNA1S</i>  | missense variant | p.Pro1340Leu |
| 1 | 201060830 | rs763260505    | A | G | 1 | 0.00053 | <i>CACNA1S</i>  | missense variant | p.Ala211Val  |
| 1 | 201772802 | rs777253346    | A | G | 1 | 0.00052 | <i>NAV1</i>     | missense variant | p.Ser1200Asn |
| 1 | 203143649 | chr1:203143649 | T | G | 1 | 0.00056 | <i>MYBPH</i>    | missense variant | p.Asp139Glu  |
| 1 | 203148927 | rs765522974    | T | A | 1 | 0.00053 | <i>CHI3L1</i>   | missense variant | p.Trp325Arg  |
| 1 | 203192776 | chr1:203192776 | T | C | 1 | 0.00054 | <i>CHIT1</i>    | missense variant | p.Met109Ile  |
| 1 | 203767455 | chr1:203767455 | C | G | 1 | 0.00052 | <i>ZBED6</i>    | missense variant | p.Val269Leu  |
| 1 | 205589257 | chr1:205589257 | G | A | 1 | 0.00052 | <i>ELK4</i>     | missense variant | p.Val306Ala  |
| 1 | 207040733 | chr1:207040733 | T | C | 1 | 0.00052 | <i>IL20</i>     | missense variant | p.Ala128Val  |
| 1 | 207134442 | chr1:207134442 | T | G | 1 | 0.00056 | <i>FCAMR</i>    | missense variant | p.Thr260Lys  |
| 1 | 207240960 | chr1:207240960 | T | G | 1 | 0.00052 | <i>PFKFB2</i>   | missense variant | p.Arg250Leu  |
| 1 | 207318001 | rs770445743    | C | T | 1 | 0.00052 | <i>CABPA</i>    | missense variant | p.Ile578Thr  |

|   |           |                |   |   |   |         |                 |                       |              |
|---|-----------|----------------|---|---|---|---------|-----------------|-----------------------|--------------|
| 1 | 207498991 | chr1:207498991 | G | A | 1 | 0.00052 | <i>CD55</i>     | missense variant      | p.Glu168Gly  |
| 1 | 207504518 | rs748840094    | T | G | 1 | 0.00052 | <i>CD55</i>     | stop gained           | p.Gly244*    |
| 1 | 207642048 | rs769415969    | T | C | 1 | 0.00052 | <i>CR2</i>      | missense variant      | p.Pro208Ser  |
|   |           |                |   |   |   |         |                 | missense variant &    |              |
| 1 | 207782637 | chr1:207782637 | T | A | 1 | 0.00052 | <i>CR1</i>      | splice region variant | p.Ile1967Leu |
| 1 | 207790072 | chr1:207790072 | A | C | 1 | 0.00052 | <i>CR1</i>      | missense variant      | p.Arg2272Ser |
| 1 | 207791569 | chr1:207791569 | A | G | 1 | 0.00052 | <i>CR1</i>      | missense variant      | p.Ser2348Asn |
| 1 | 209783218 | chr1:209783218 | T | G | 1 | 0.00052 | <i>CAMK1G</i>   | missense variant      | p.Leu257Phe  |
| 1 | 211545599 | chr1:211545599 | C | T | 1 | 0.00052 | <i>TRAF5</i>    | missense variant      | p.Val410Ala  |
| 1 | 223283834 | rs778914774    | C | T | 1 | 0.00052 | <i>TLR5</i>     | missense variant      | p.Asn847Ser  |
| 1 | 223285383 | chr1:223285383 | T | C | 1 | 0.00052 | <i>TLR5</i>     | missense variant      | p.Ala331Thr  |
| 1 | 223285788 | chr1:223285788 | C | T | 1 | 0.00052 | <i>TLR5</i>     | missense variant      | p.Lys196Glu  |
| 1 | 223988446 | chr1:223988446 | G | C | 1 | 0.00052 | <i>TP53BP2</i>  | missense variant      | p.Gly431Ala  |
| 1 | 235969755 | chr1:235969755 | A | T | 1 | 0.00052 | <i>LYST</i>     | missense variant      | p.His894Leu  |
| 1 | 235976285 | chr1:235976285 | C | T | 1 | 0.00052 | <i>LYST</i>     | missense variant      | p.Glu90Gly   |
| 1 | 236706938 | chr1:236706938 | G | A | 1 | 0.00052 | <i>LGALS8</i>   | missense variant      | p.Asn252Asp  |
| 1 | 236730038 | rs369632116    | T | G | 1 | 0.00052 | <i>HEATR1</i>   | missense variant      | p.Leu1406Met |
| 1 | 247013491 | chr1:247013491 | A | T | 1 | 0.00052 | <i>AHCTF1</i>   | missense variant      | p.Arg1974Ser |
| 1 | 247013587 | chr1:247013587 | A | T | 1 | 0.00052 | <i>AHCTF1</i>   | missense variant      | p.Arg1942Ser |
| 1 | 247027372 | rs759273373    | G | A | 1 | 0.00052 | <i>AHCTF1</i>   | missense variant      | p.Ser1167Pro |
|   |           |                |   |   |   |         |                 | missense variant &    |              |
| 1 | 247040602 | chr1:247040602 | A | C | 1 | 0.00052 | <i>AHCTF1</i>   | splice region variant | p.Cys923Phe  |
| 1 | 247588157 | chr1:247588157 | G | C | 1 | 0.00052 | <i>NLRP3</i>    | missense variant      | p.Ser471Cys  |
| 2 | 11355692  | rs753011445    | C | T | 1 | 0.00052 | <i>ROCK2</i>    | missense variant      | p.Glu514Gly  |
| 2 | 23919236  | chr2:23919236  | C | T | 1 | 0.00052 | <i>KLHL29</i>   | missense variant      | p.Val653Ala  |
| 2 | 24092612  | chr2:24092612  | A | G | 1 | 0.00052 | <i>ATAD2B</i>   | missense variant      | p.His333Tyr  |
| 2 | 24302399  | chr2:24302399  | T | C | 1 | 0.00052 | <i>TP53I3</i>   | missense variant      | p.Gly244Asp  |
| 2 | 24360783  | chr2:24360783  | G | T | 1 | 0.00054 | <i>FAM228B</i>  | missense variant      | p.Leu58Arg   |
| 2 | 24522977  | rs781391253    | T | C | 1 | 0.00052 | <i>ITSN2</i>    | missense variant      | p.Arg382His  |
| 2 | 24930558  | chr2:24930558  | C | A | 1 | 0.00052 | <i>NCOA1</i>    | missense variant      | p.Lys740Thr  |
|   |           |                |   |   |   |         |                 | missense variant &    |              |
| 2 | 24952371  | rs142674833    | A | G | 1 | 0.00052 | <i>NCOA1</i>    | splice region variant | p.Gly963Glu  |
| 2 | 25045402  | chr2:25045402  | C | T | 1 | 0.00052 | <i>ADCY3</i>    | missense variant      | p.Asn994Ser  |
| 2 | 25471073  | chr2:25471073  | C | T | 1 | 0.00055 | <i>DNMT3A</i>   | missense variant      | p.Asn230Asp  |
| 2 | 26204555  | rs769044393    | T | C | 1 | 0.00056 | <i>KIF3C</i>    | missense variant      | p.Val78Met   |
| 2 | 26607864  | chr2:26607864  | C | T | 1 | 0.00052 | <i>EPT1</i>     | missense variant      | p.Tyr257His  |
| 2 | 26671665  | chr2:26671665  | A | C | 1 | 0.00054 | <i>DRC1</i>     | missense variant      | p.Asp501Glu  |
| 2 | 27015410  | chr2:27015410  | G | A | 1 | 0.00053 | <i>CENPA</i>    | missense variant      | p.Asn84Ser   |
| 2 | 27259596  | chr2:27259596  | A | G | 1 | 0.00052 | <i>TMEM214</i>  | missense variant      | p.Val284Met  |
| 2 | 27327510  | chr2:27327510  | G | C | 1 | 0.00055 | <i>CGREF1</i>   | missense variant      | p.Val31Leu   |
| 2 | 27351889  | chr2:27351889  | A | G | 1 | 0.00052 | <i>ABHD1</i>    | missense variant      | p.Asp118Asn  |
| 2 | 27500791  | chr2:27500791  | T | G | 1 | 0.00052 | <i>DNACJCSG</i> | missense variant      | p.Asp95Tyr   |
| 2 | 27601915  | chr2:27601915  | A | G | 1 | 0.00053 | <i>ZNF513</i>   | missense variant      | p.Ser73Phe   |
| 2 | 27684321  | chr2:27684321  | T | C | 1 | 0.00052 | <i>IFT172</i>   | missense variant      | p.Glu753Lys  |
| 2 | 27851368  | rs188110444    | A | C | 1 | 0.00052 | <i>CCDC121</i>  | missense variant      | p.Arg88Leu   |
| 2 | 27887385  | chr2:27887385  | T | C | 1 | 0.00052 | <i>SLC4A1AP</i> | stop gained           | p.Arg256*    |
| 2 | 28081344  | rs147662293    | T | C | 1 | 0.00055 | <i>RBKS</i>     | missense variant      | p.Ala62Thr   |
| 2 | 28999758  | rs760562458    | A | G | 1 | 0.00052 | <i>PPP1CB</i>   | missense variant      | p.Ala32Thr   |
| 2 | 29063332  | chr2:29063332  | C | G | 1 | 0.00052 | <i>SPDYA</i>    | missense variant      | p.Glu283Gln  |
| 2 | 29222155  | chr2:29222155  | C | G | 1 | 0.00056 | <i>FAM179A</i>  | missense variant      | p.Gly83Ala   |
|   |           |                |   |   |   |         |                 | missense variant &    |              |
| 2 | 30682588  | chr2:30682588  | C | G | 1 | 0.00052 | <i>LCLAT1</i>   | splice region variant | p.Gly37Ala   |
| 2 | 30966265  | chr2:30966265  | C | T | 1 | 0.00052 | <i>CAPN13</i>   | missense variant      | p.Met477Val  |
| 2 | 31425957  | chr2:31425957  | A | C | 1 | 0.00052 | <i>CAPN14</i>   | missense variant      | p.Asp92Tyr   |
| 2 | 31483576  | rs773880032    | T | G | 1 | 0.00053 | <i>EHD3</i>     | missense variant      | p.Ala235Ser  |
| 2 | 32422820  | rs755069292    | A | G | 1 | 0.00052 | <i>SLC30A6</i>  | missense variant      | p.Arg237Gln  |
| 2 | 32530604  | rs753860958    | C | T | 1 | 0.00052 | <i>YIPF4</i>    | missense variant      | p.Val215Ala  |
| 2 | 32735666  | chr2:32735666  | T | G | 1 | 0.00052 | <i>BIRC6</i>    | missense variant      | p.Gln3437His |
| 2 | 33335810  | rs755344524    | T | C | 1 | 0.00052 | <i>LTBP1</i>    | missense variant      | p.Pro342Leu  |
| 2 | 33498801  | chr2:33498801  | C | T | 1 | 0.00052 | <i>LTBP1</i>    | missense variant      | p.Ile900Thr  |
| 2 | 37310480  | rs764689790    | C | G | 1 | 0.00052 | <i>HEATR5B</i>  | missense variant      | p.Ile26Met   |
| 2 | 39553381  | chr2:39553381  | T | C | 1 | 0.00052 | <i>MAP4K3</i>   | missense variant      | p.Gly190Ser  |
| 2 | 43514109  | chr2:43514109  | T | G | 1 | 0.00052 | <i>THADA</i>    | missense variant      | p.Ala1701Asp |
| 2 | 45807071  | chr2:45807071  | C | G | 1 | 0.00052 | <i>SRBD1</i>    | missense variant      | p.Leu339Val  |
| 2 | 46378210  | chr2:46378210  | A | G | 1 | 0.00053 | <i>PRKCE</i>    | missense variant      | p.Val588Met  |
| 2 | 46602856  | chr2:46602856  | C | G | 1 | 0.00054 | <i>EPAS1</i>    | missense variant      | p.Gly305Ala  |
| 2 | 61275738  | chr2:61275738  | A | T | 1 | 0.00052 | <i>PEX13</i>    | missense variant      | p.Ser349Thr  |
| 2 | 61473490  | chr2:61473490  | G | C | 1 | 0.00053 | <i>USP34</i>    | missense variant      | p.Val2173Leu |
| 2 | 68365908  | chr2:68365908  | T | A | 1 | 0.00052 | <i>WDR92</i>    | missense variant      | p.Met200Lys  |

|   |           |                |   |   |   |         |                      |                                             |               |
|---|-----------|----------------|---|---|---|---------|----------------------|---------------------------------------------|---------------|
| 2 | 68384615  | chr2:68384615  | G | A | 1 | 0.00052 | <i>RP11-474G23.1</i> | missense variant                            | p.Leu325Pro   |
| 2 | 68384796  | chr2:68384796  | T | C | 1 | 0.00053 | <i>RP11-474G23.1</i> | missense variant                            | p.Gly265Ser   |
| 2 | 69590685  | chr2:69590685  | C | T | 1 | 0.00052 | <i>GFPT1</i>         | missense variant                            | p.Lys114Arg   |
| 2 | 69709811  | chr2:69709811  | T | C | 1 | 0.00053 | <i>AAK1</i>          | missense variant                            | p.Met833Ile   |
| 2 | 69769789  | chr2:69769789  | A | C | 1 | 0.00052 | <i>AAK1</i>          | missense variant                            | p.Val134Leu   |
| 2 | 73198715  | chr2:73198715  | G | T | 1 | 0.00054 | <i>SFXN5</i>         | missense variant                            | p.Lys242Thr   |
| 2 | 74717515  | chr2:74717515  | C | G | 1 | 0.00054 | <i>TTC31</i>         | missense variant                            | p.Ser126Thr   |
| 2 | 87015654  | chr2:87015654  | C | G | 1 | 0.00052 | <i>CD8A</i>          | missense variant &<br>splice region variant | p.Arg260Gly   |
| 2 | 98382607  | rs751344985    | T | C | 1 | 0.00052 | <i>TMEM131</i>       | missense variant                            | p.Asp1565Asn  |
| 2 | 98428991  | chr2:98428991  | T | C | 1 | 0.00052 | <i>TMEM131</i>       | missense variant                            | p.Gly586Arg   |
| 2 | 98431769  | rs777316829    | A | T | 1 | 0.00052 | <i>TMEM131</i>       | missense variant &<br>splice region variant | p.His319Leu   |
| 2 | 100623724 | rs140526847    | C | T | 1 | 0.00052 | <i>AFF3</i>          | missense variant                            | p.Ile150Val   |
| 2 | 102507680 | chr2:102507680 | T | C | 1 | 0.00052 | <i>MAP4K4</i>        | missense variant                            | p.Thr1311Ile  |
| 2 | 102509737 | rs146402687    | A | T | 1 | 0.00052 | <i>FLJ20373</i>      | stop gained                                 | p.Leu172*     |
| 2 | 102954780 | rs771730337    | T | A | 1 | 0.00053 | <i>IL1RL1</i>        | missense variant                            | p.Lys19Met    |
| 2 | 102955351 | chr2:102955351 | T | A | 1 | 0.00052 | <i>IL1RL1</i>        | missense variant                            | p.Gln39Leu    |
| 2 | 109513434 | chr2:109513434 | T | A | 1 | 0.00054 | <i>EDAR</i>          | missense variant                            | p.Ser458Thr   |
| 2 | 128322932 | chr2:128322932 | C | T | 1 | 0.00056 | <i>MYO7B</i>         | missense variant                            | p.Leu86Pro    |
| 2 | 128339504 | chr2:128339504 | G | C | 1 | 0.00057 | <i>MYO7B</i>         | missense variant                            | p.His373Gln   |
| 2 | 128707502 | chr2:128707502 | T | C | 1 | 0.00052 | <i>SAP130</i>        | missense variant                            | p.Arg939Gln   |
| 2 | 128712754 | rs376315873    | A | G | 1 | 0.00053 | <i>SAP130</i>        | missense variant                            | p.Pro769Leu   |
| 2 | 133539592 | rs780737770    | T | G | 1 | 0.00052 | <i>NCKAP5</i>        | missense variant                            | p.Leu1598Met  |
| 2 | 133539733 | chr2:133539733 | C | T | 1 | 0.00052 | <i>NCKAP5</i>        | missense variant                            | p.Arg1551Gly  |
| 2 | 135712103 | chr2:135712103 | T | A | 1 | 0.00052 | <i>CCNT2</i>         | missense variant                            | p.Glu693Val   |
| 2 | 135756467 | rs141899370    | C | G | 1 | 0.00053 | <i>MAP3K19</i>       | missense variant                            | p.Arg139Gly   |
| 2 | 136362420 | chr2:136362420 | T | G | 1 | 0.00053 | <i>R3HDM1</i>        | missense variant                            | p.Arg2Met     |
| 2 | 152132350 | rs766955341    | A | T | 1 | 0.00052 | <i>NMI</i>           | missense variant                            | p.Lys123Asn   |
| 2 | 152319950 | chr2:152319950 | G | A | 1 | 0.00053 | <i>RIF1</i>          | missense variant                            | p.Met1306Val  |
| 2 | 152330569 | chr2:152330569 | C | A | 1 | 0.00053 | <i>RIF1</i>          | missense variant                            | p.Glu2396Ala  |
| 2 | 160599702 | chr2:160599702 | G | C | 1 | 0.00052 | <i>MARCH7</i>        | missense variant                            | p.Ser95Cys    |
| 2 | 160824050 | chr2:160824050 | A | C | 1 | 0.00052 | <i>PLA2R1</i>        | missense variant &<br>splice region variant | p.Lys968Asn   |
| 2 | 163046214 | chr2:163046214 | C | T | 1 | 0.00053 | <i>FAP</i>           | missense variant                            | p.Ile501Val   |
| 2 | 163066471 | chr2:163066471 | G | C | 1 | 0.00052 | <i>FAP</i>           | missense variant                            | p.Trp346Cys   |
| 2 | 163080142 | chr2:163080142 | C | T | 1 | 0.00052 | <i>FAP</i>           | missense variant                            | p.Tyr130Cys   |
| 2 | 163163228 | chr2:163163228 | T | C | 1 | 0.00052 | <i>IFIH1</i>         | missense variant                            | p.Val254Ile   |
| 2 | 163174615 | chr2:163174615 | C | T | 1 | 0.00053 | <i>IFIH1</i>         | missense variant                            | p.Lys68Arg    |
| 2 | 163204145 | rs751929215    | G | A | 1 | 0.00052 | <i>GCA</i>           | missense variant                            | p.Thr29Ala    |
| 2 | 169622848 | rs773417516    | T | C | 1 | 0.00052 | <i>CERS6</i>         | missense variant                            | p.Pro340Leu   |
| 2 | 169681188 | chr2:169681188 | A | C | 1 | 0.00052 | <i>NOSTRIN</i>       | missense variant                            | p.Ala53Glu    |
| 2 | 169948301 | rs754460573    | T | C | 1 | 0.00052 | <i>DHRS9</i>         | missense variant &<br>splice region variant | p.Arg252Trp   |
| 2 | 170030471 | rs764887934    | C | T | 1 | 0.00052 | <i>LRP2</i>          | missense variant                            | p.Asn3658Asp  |
| 2 | 170093681 | chr2:170093681 | T | G | 1 | 0.00052 | <i>LRP2</i>          | missense variant                            | p.Ser1541Arg  |
| 2 | 170101218 | chr2:170101218 | T | C | 1 | 0.00052 | <i>LRP2</i>          | missense variant                            | p.Asp1139Asn  |
| 2 | 170163901 | rs759417883    | A | C | 1 | 0.00052 | <i>LRP2</i>          | missense variant                            | p.Ser106Ile   |
| 2 | 173352342 | chr2:173352342 | G | T | 1 | 0.00052 | <i>ITGA6</i>         | missense variant                            | p.Phe782Cys   |
| 2 | 173429386 | rs766194416    | C | T | 1 | 0.00052 | <i>PDK1</i>          | missense variant                            | p.Ile209Thr   |
| 2 | 179411904 | rs541040798    | A | G | 1 | 0.00052 | <i>TTN</i>           | missense variant                            | p.Arg31450Cys |
| 2 | 179416689 | chr2:179416689 | T | G | 1 | 0.00052 | <i>TTN</i>           | stop gained                                 | p.Ser30313*   |
| 2 | 179417556 | chr2:179417556 | A | G | 1 | 0.00052 | <i>TTN</i>           | missense variant                            | p.Pro30024Leu |
| 2 | 179419339 | chr2:179419339 | T | C | 1 | 0.00052 | <i>TTN</i>           | missense variant                            | p.Val29579Ile |
| 2 | 179436520 | rs776673912    | T | C | 1 | 0.00052 | <i>TTN</i>           | missense variant                            | p.Arg24780Gln |
| 2 | 179439589 | chr2:179439589 | G | A | 1 | 0.00052 | <i>TTN</i>           | missense variant                            | p.Val23757Ala |
| 2 | 179439763 | chr2:179439763 | T | C | 1 | 0.00052 | <i>TTN</i>           | missense variant                            | p.Ser23699Asn |
| 2 | 179439827 | chr2:179439827 | T | G | 1 | 0.00052 | <i>TTN</i>           | missense variant                            | p.Gln23678Lys |
| 2 | 179440124 | chr2:179440124 | C | A | 1 | 0.00052 | <i>TTN</i>           | missense variant                            | p.Trp23579Gly |
| 2 | 179441911 | chr2:179441911 | A | T | 1 | 0.00052 | <i>TTN</i>           | missense variant                            | p.Asn23051Tyr |
| 2 | 179443428 | chr2:179443428 | A | G | 1 | 0.00052 | <i>TTN</i>           | missense variant                            | p.Pro22747Ser |
| 2 | 179452524 | chr2:179452524 | T | G | 1 | 0.00052 | <i>TTN</i>           | missense variant                            | p.Pro21171His |
| 2 | 179463983 | rs766906652    | G | A | 1 | 0.00052 | <i>TTN</i>           | missense variant                            | p.Ile18846Thr |
| 2 | 179477250 | chr2:179477250 | A | C | 1 | 0.00052 | <i>TTN</i>           | missense variant                            | p.Ala16668Ser |
| 2 | 179486355 | rs768414586    | G | C | 1 | 0.00052 | <i>TTN</i>           | missense variant                            | p.Gly15066Arg |
| 2 | 179495856 | chr2:179495856 | T | C | 1 | 0.00052 | <i>TTN</i>           | missense variant                            | p.Arg14640His |
| 2 | 179499131 | chr2:179499131 | T | A | 1 | 0.00053 | <i>TTN</i>           | missense variant                            | p.Val14126Glu |
| 2 | 179500824 | rs727504774    | T | C | 1 | 0.00052 | <i>TTN</i>           | missense variant                            | p.Arg13825Gln |
| 2 | 179518183 | chr2:179518183 | T | G | 1 | 0.00052 | <i>TTN</i>           | missense variant                            | p.Pro12893His |

|   |           |                |   |   |   |         |                   |                                             |               |
|---|-----------|----------------|---|---|---|---------|-------------------|---------------------------------------------|---------------|
| 2 | 179527104 | rs779791341    | T | C | 1 | 0.00055 | <i>TTN</i>        | missense variant                            | p.Val12334Met |
| 2 | 179542425 | rs764585210    | G | A | 1 | 0.00052 | <i>TTN</i>        | missense variant                            | p.Val11405Ala |
| 2 | 179579754 | chr2:179579754 | A | T | 1 | 0.00052 | <i>TTN</i>        | missense variant                            | p.Asp8720Val  |
| 2 | 179595004 | chr2:179595004 | T | C | 1 | 0.00052 | <i>TTN</i>        | missense variant                            | p.Met6041Ile  |
| 2 | 179605752 | rs397517830    | T | C | 1 | 0.00052 | <i>TTN</i>        | missense variant                            | p.Glu4070Lys  |
| 2 | 179621261 | chr2:179621261 | C | A | 1 | 0.00052 | <i>TTN</i>        | missense variant                            | p.Ser3648Ala  |
| 2 | 179640287 | rs767322897    | T | C | 1 | 0.00052 | <i>TTN</i>        | missense variant                            | p.Val2102Met  |
| 2 | 179664272 | chr2:179664272 | C | T | 1 | 0.00054 | <i>TTN</i>        | missense variant                            | p.Ile286Val   |
| 2 | 181922463 | chr2:181922463 | G | A | 1 | 0.00052 | <i>UBE2E3</i>     | missense variant                            | p.Ile97Val    |
| 2 | 182359500 | chr2:182359500 | G | A | 1 | 0.00052 | <i>ITGA4</i>      | missense variant                            | p.Ile434Val   |
| 2 | 183703335 | rs758921569    | T | C | 1 | 0.00052 | <i>FRZB</i>       | missense variant                            | p.Arg200Gln   |
| 2 | 183859591 | chr2:183859591 | A | C | 1 | 0.00052 | <i>NCKAP1</i>     | missense variant                            | p.Asp262Tyr   |
| 2 | 198571321 | chr2:198571321 | T | G | 1 | 0.00052 | <i>MARS2</i>      | stop gained                                 | p.Glu398*     |
| 2 | 198948896 | rs771861039    | T | C | 1 | 0.00052 | <i>PLCL1</i>      | missense variant                            | p.Arg219Trp   |
| 2 | 198949716 | chr2:198949716 | A | G | 1 | 0.00052 | <i>PLCL1</i>      | missense variant                            | p.Gly492Glu   |
| 2 | 198949836 | rs777477678    | G | A | 1 | 0.00052 | <i>PLCL1</i>      | missense variant                            | p.Lys532Arg   |
| 2 | 202093772 | rs151011448    | A | G | 1 | 0.00052 | <i>CASP10</i>     | missense variant                            | p.Arg511Gln   |
| 2 | 203152396 | chr2:203152396 | G | A | 1 | 0.00052 | <i>NOP58</i>      | missense variant                            | p.Arg150Gly   |
| 2 | 203420137 | rs755765731    | A | C | 1 | 0.00052 | <i>BMPR2</i>      | missense variant                            | p.Asn583Lys   |
| 2 | 204736181 | chr2:204736181 | T | C | 1 | 0.00052 | <i>CTLA4</i>      | missense variant                            | p.Leu180Phe   |
| 2 | 216229603 | chr2:216229603 | T | C | 1 | 0.00052 | <i>FN1</i>        | missense variant &<br>splice region variant | p.Arg2417Gln  |
| 2 | 216256433 | chr2:216256433 | A | G | 1 | 0.00053 | <i>FN1</i>        | missense variant                            | p.Arg1392Cys  |
| 2 | 216263988 | chr2:216263988 | T | C | 1 | 0.00052 | <i>FN1</i>        | missense variant                            | p.Gly1114Ser  |
| 2 | 219000467 | rs200906463    | A | G | 1 | 0.00053 | <i>CXCR2</i>      | missense variant                            | p.Ala315Thr   |
| 2 | 219855702 | chr2:219855702 | C | G | 1 | 0.00052 | <i>CRYBA2</i>     | missense variant                            | p.Ser106Arg   |
| 2 | 228155568 | chr2:228155568 | A | C | 1 | 0.00052 | <i>COL4A3</i>     | stop gained                                 | p.Ser1059*    |
| 2 | 231042338 | chr2:231042338 | C | A | 1 | 0.00052 | <i>SP110</i>      | missense variant                            | p.Phe502Leu   |
| 2 | 233839504 | rs186848841    | T | C | 1 | 0.00052 | <i>NGEF</i>       | missense variant                            | p.Glu33Lys    |
| 2 | 233995240 | chr2:233995240 | A | G | 1 | 0.00052 | <i>INPP5D</i>     | missense variant                            | p.Ala183Thr   |
| 2 | 234231596 | chr2:234231596 | G | C | 1 | 0.00052 | <i>SAG</i>        | missense variant                            | p.Pro127Arg   |
| 2 | 234255546 | chr2:234255546 | A | C | 1 | 0.00052 | <i>SAG</i>        | missense variant                            | p.Asp402Glu   |
| 2 | 237406115 | chr2:237406115 | T | C | 1 | 0.00052 | <i>IQCA1</i>      | missense variant                            | p.Met9Ile     |
| 2 | 241556395 | rs753593237    | C | A | 1 | 0.00052 | <i>CAPN10</i>     | missense variant &<br>splice region variant | p.Thr134Pro   |
| 3 | 419502    | chr3:419502    | G | A | 1 | 0.00052 | <i>CHL1</i>       | missense variant                            | p.Ile585Val   |
| 3 | 423910    | chr3:423910    | A | G | 1 | 0.00052 | <i>CHL1</i>       | missense variant                            | p.Arg642Lys   |
| 3 | 447213    | rs139892128    | C | G | 1 | 0.00052 | <i>CHL1</i>       | missense variant                            | p.Arg1165Pro  |
| 3 | 3095627   | rs749951952    | A | G | 1 | 0.00052 | <i>CNTN4</i>      | missense variant                            | p.Ser983Asn   |
| 3 | 3192625   | chr3:3192625   | C | G | 1 | 0.00052 | <i>CRBN</i>       | missense variant                            | p.Thr418Arg   |
| 3 | 3192720   | chr3:3192720   | T | C | 1 | 0.00052 | <i>CRBN</i>       | stop gained                                 | p.Trp386*     |
| 3 | 4110287   | chr3:4110287   | A | C | 1 | 0.00052 | <i>SUMF1</i>      | missense variant                            | p.Arg386Leu   |
| 3 | 4355357   | rs752256260    | T | C | 1 | 0.00052 | <i>SETMAR</i>     | missense variant                            | p.Ser311Leu   |
| 3 | 4558204   | rs751806213    | G | A | 1 | 0.00052 | <i>ITPR1</i>      | missense variant                            | p.His10Arg    |
| 3 | 4774844   | chr3:4774844   | A | C | 1 | 0.00052 | <i>ITPR1</i>      | missense variant                            | p.Leu1750Ile  |
| 3 | 5249805   | chr3:5249805   | T | A | 1 | 0.00052 | <i>EDEM1</i>      | missense variant                            | p.Ile456Phe   |
| 3 | 9704036   | chr3:9704036   | G | C | 1 | 0.00052 | <i>MTMR14</i>     | missense variant                            | p.Pro132Ala   |
| 3 | 9785920   | rs754915176    | G | A | 1 | 0.00054 | <i>BRPF1</i>      | missense variant                            | p.Asn883Ser   |
| 3 | 9868858   | chr3:9868858   | C | T | 1 | 0.00052 | <i>ARPC4-TTL3</i> | missense variant                            | p.Val412Ala   |
| 3 | 10005877  | chr3:10005877  | G | T | 1 | 0.00052 | <i>EMC3</i>       | missense variant                            | p.Glu221Ala   |
| 3 | 10312631  | rs749767833    | A | G | 1 | 0.00053 | <i>TATDN2</i>     | missense variant                            | p.Val589Met   |
| 3 | 10319976  | chr3:10319976  | T | G | 1 | 0.00055 | <i>TATDN2</i>     | missense variant                            | p.Gly659Cys   |
| 3 | 12544850  | rs373274480    | T | C | 1 | 0.00052 | <i>TSEN2</i>      | missense variant                            | p.Thr133Met   |
| 3 | 15115413  | rs762060370    | C | T | 1 | 0.00052 | <i>ZFYVE20</i>    | missense variant                            | p.Asp744Gly   |
| 3 | 17053032  | chr3:17053032  | G | A | 1 | 0.00052 | <i>PLCL2</i>      | missense variant                            | p.Ile606Val   |
| 3 | 19974813  | rs757699669    | A | G | 1 | 0.00052 | <i>EFHB</i>       | missense variant                            | p.Ala233Val   |
| 3 | 20027113  | chr3:20027113  | C | T | 1 | 0.00053 | <i>PP2D1</i>      | missense variant                            | p.Glu551Gly   |
| 3 | 33093405  | rs76016860     | C | T | 1 | 0.00052 | <i>GLB1</i>       | missense variant                            | p.Asp343Gly   |
| 3 | 38134338  | rs765139538    | A | G | 1 | 0.00052 | <i>DLEC1</i>      | missense variant                            | p.Asp575Asn   |
| 3 | 38539176  | chr3:38539176  | A | G | 1 | 0.00052 | <i>EXOG</i>       | missense variant                            | p.Ala74Thr    |
| 3 | 38545171  | chr3:38545171  | G | A | 1 | 0.00053 | <i>EXOG</i>       | missense variant                            | p.Asp142Gly   |
| 3 | 38591990  | rs199473331    | T | C | 1 | 0.00056 | <i>SCN5A</i>      | missense variant                            | p.Arg1958Gln  |
| 3 | 38592647  | rs200217157    | T | C | 1 | 0.00054 | <i>SCN5A</i>      | missense variant                            | p.Arg1739Gln  |
| 3 | 42235341  | rs376442996    | C | T | 1 | 0.00052 | <i>TRAK1</i>      | missense variant                            | p.Val309Ala   |
| 3 | 46003729  | rs746250940    | G | A | 1 | 0.00052 | <i>FYCO1</i>      | missense variant                            | p.Ile1142Thr  |
| 3 | 46010120  | rs768271085    | A | G | 1 | 0.00052 | <i>FYCO1</i>      | stop gained                                 | p.Arg236*     |
| 3 | 46307012  | chr3:46307012  | G | C | 1 | 0.00052 | <i>CCR3</i>       | missense variant                            | p.Ile142Met   |
| 3 | 46620841  | chr3:46620841  | G | A | 1 | 0.00053 | <i>TDGF1</i>      | missense variant                            | p.Met70Val    |

|   |           |                |   |   |   |         |                       |                       |              |
|---|-----------|----------------|---|---|---|---------|-----------------------|-----------------------|--------------|
| 3 | 48501189  | chr3:48501189  | T | C | 1 | 0.00052 | <i>ATRIP</i>          | missense variant      | p.Ser310Phe  |
| 3 | 49321912  | chr3:49321912  | T | C | 1 | 0.00052 | <i>USP4</i>           | missense variant      | p.Glu793Lys  |
| 3 | 49335323  | chr3:49335323  | A | C | 1 | 0.00052 | <i>USP4</i>           | missense variant      | p.Met557Ile  |
| 3 | 49456725  | rs781466698    | A | G | 1 | 0.00055 | <i>AMT</i>            | missense variant      | p.Arg222Cys  |
| 3 | 49569281  | chr3:49569281  | T | C | 1 | 0.00055 | <i>DAG1</i>           | missense variant      | p.Thr446Ile  |
| 3 | 49740157  | chr3:49740157  | A | C | 1 | 0.00053 | <i>RNF123</i>         | missense variant      | p.Ala574Asp  |
| 3 | 49753009  | chr3:49753009  | T | G | 1 | 0.00057 | <i>RNF123</i>         | splice region variant | p.Lys1004Asn |
| 3 | 49830669  | rs148137199    | T | C | 1 | 0.00053 | <i>CDHR4</i>          | missense variant      | p.Val567Met  |
| 3 | 49833401  | rs768814405    | A | C | 1 | 0.00052 | <i>CDHR4</i>          | missense variant      | p.Val229Phe  |
| 3 | 50005081  | rs368376344    | C | T | 1 | 0.00052 | <i>RBM6</i>           | missense variant      | p.Tyr75His   |
| 3 | 50340155  | chr3:50340155  | C | T | 1 | 0.00056 | <i>HYAL1</i>          | missense variant      | p.Gln78Arg   |
| 3 | 50357323  | chr3:50357323  | A | G | 1 | 0.00056 | <i>HYAL2</i>          | missense variant      | p.Arg200Trp  |
| 3 | 50387151  | chr3:50387151  | A | G | 1 | 0.00053 | <i>NPRL2</i>          | missense variant      | p.Thr95Ile   |
| 3 | 50390686  | chr3:50390686  | A | G | 1 | 0.00053 | <i>CYB561D2</i>       | missense variant      | p.Met60Ile   |
| 3 | 50421754  | chr3:50421754  | C | A | 1 | 0.00052 | <i>CACNA2D2</i>       | missense variant      | p.Ser175Arg  |
| 3 | 50684588  | rs749474530    | T | C | 1 | 0.00054 | <i>MAPKAPK3</i>       | missense variant      | p.Thr317Met  |
| 3 | 50685473  | chr3:50685473  | G | A | 1 | 0.00053 | <i>MAPKAPK3</i>       | missense variant      | p.Gln382Arg  |
| 3 | 52282183  | rs375720271    | A | G | 1 | 0.00054 | <i>PPM1M</i>          | missense variant      | p.Arg242Gln  |
| 3 | 52360860  | rs201173405    | G | A | 1 | 0.00054 | <i>DNAH1</i>          | missense variant      | p.Ile231Val  |
| 3 | 52721370  | chr3:52721370  | T | C | 1 | 0.00052 | <i>GNL3</i>           | missense variant      | p.Leu61Phe   |
| 3 | 52812385  | rs771292673    | T | G | 1 | 0.00052 | <i>ITIH1</i>          | missense variant      | p.Leu56Phe   |
| 3 | 52816262  | chr3:52816262  | A | G | 1 | 0.00052 | <i>ITIH1</i>          | missense variant      | p.Met303Ile  |
| 3 | 52833406  | rs758669573    | A | G | 1 | 0.00052 | <i>ITIH3</i>          | missense variant      | p.Val270Met  |
| 3 | 52860574  | chr3:52860574  | T | A | 1 | 0.00055 | <i>ITIH4</i>          | missense variant      | p.Trp205Arg  |
| 3 | 52876865  | rs779114178    | G | A | 1 | 0.00052 | <i>TMEM110-MUSTN1</i> | missense variant      | p.Tyr244His  |
| 3 | 53217499  | chr3:53217499  | T | C | 1 | 0.00055 | <i>PRKCD</i>          | missense variant      | p.Pro230Leu  |
| 3 | 53796108  | chr3:53796108  | G | C | 1 | 0.00053 | <i>CACNA1D</i>        | splice region variant | p.Asp1310Glu |
| 3 | 53883794  | chr3:53883794  | T | G | 1 | 0.00052 | <i>IL17RB</i>         | missense variant      | p.Met66Ile   |
| 3 | 56675649  | rs370672814    | A | G | 1 | 0.00052 | <i>FAM208A</i>        | missense variant      | p.Arg783Cys  |
| 3 | 57902736  | rs752100585    | T | C | 1 | 0.00052 | <i>SLMAP</i>          | missense variant      | p.Arg731Trp  |
| 3 | 58381436  | rs755436386    | G | C | 1 | 0.00052 | <i>PXK</i>            | missense variant      | p.Gln258Glu  |
| 3 | 58487273  | chr3:58487273  | A | G | 1 | 0.00052 | <i>KCTD6</i>          | missense variant      | p.Val210Met  |
| 3 | 62189525  | rs749942817    | A | G | 1 | 0.00053 | <i>PTPRG</i>          | missense variant      | p.Ala686Thr  |
| 3 | 62259422  | rs765533974    | C | A | 1 | 0.00052 | <i>PTPRG</i>          | missense variant      | p.Lys1123Thr |
| 3 | 62268508  | rs778947846    | G | C | 1 | 0.00052 | <i>PTPRG</i>          | missense variant      | p.Ala1340Gly |
| 3 | 69079051  | rs149174901    | T | G | 1 | 0.00052 | <i>TMF1</i>           | missense variant      | p.Leu840Ile  |
| 3 | 69112200  | rs547884414    | C | T | 1 | 0.00052 | <i>UBA3</i>           | missense variant      | p.Asn209Ser  |
| 3 | 69230392  | rs367603851    | A | G | 1 | 0.00052 | <i>FRMD4B</i>         | missense variant      | p.Pro837Ser  |
| 3 | 69243012  | chr3:69243012  | C | G | 1 | 0.00052 | <i>FRMD4B</i>         | missense variant      | p.Gln501Glu  |
| 3 | 69244178  | chr3:69244178  | G | C | 1 | 0.00052 | <i>FRMD4B</i>         | missense variant      | p.Glu495Gln  |
| 3 | 69246116  | rs754526422    | C | T | 1 | 0.00052 | <i>FRMD4B</i>         | missense variant      | p.Ile343Val  |
| 3 | 69249968  | chr3:69249968  | T | A | 1 | 0.00052 | <i>FRMD4B</i>         | missense variant      | p.Ser2Thr    |
| 3 | 89390209  | chr3:89390209  | G | A | 1 | 0.00052 | <i>EPHA3</i>          | missense variant      | p.Met320Val  |
| 3 | 93596001  | chr3:93596001  | C | T | 1 | 0.00052 | <i>PROS1</i>          | missense variant      | p.Tyr560Cys  |
| 3 | 93615503  | chr3:93615503  | C | G | 1 | 0.00053 | <i>PROS1</i>          | missense variant      | p.Asp294Glu  |
| 3 | 93619659  | chr3:93619659  | C | T | 1 | 0.00052 | <i>PROS1</i>          | missense variant      | p.Lys239Arg  |
| 3 | 93783386  | chr3:93783386  | C | G | 1 | 0.00052 | <i>NSUN3</i>          | missense variant      | p.Val40Leu   |
| 3 | 97605508  | chr3:97605508  | A | C | 1 | 0.00052 | <i>CRYBG3</i>         | missense variant      | p.Gln448Lys  |
| 3 | 100362472 | rs116356748    | T | C | 1 | 0.00053 | <i>GPR128</i>         | missense variant      | p.Thr314Met  |
| 3 | 100535598 | rs745848822    | A | G | 1 | 0.00052 | <i>ABI3BP</i>         | missense variant      | p.Arg1062Trp |
| 3 | 100548490 | chr3:100548490 | T | C | 1 | 0.00052 | <i>ABI3BP</i>         | missense variant      | p.Arg833Gln  |
| 3 | 119133678 | rs761071117    | A | G | 1 | 0.00054 | <i>ARHGAP31</i>       | missense variant      | p.Glu968Lys  |
| 3 | 119134605 | chr3:119134605 | T | G | 1 | 0.00052 | <i>ARHGAP31</i>       | missense variant      | p.Ala1277Ser |
| 3 | 121980448 | rs762998933    | G | A | 1 | 0.00052 | <i>CASR</i>           | missense variant      | p.Asn189Ser  |
| 3 | 123663804 | chr3:123663804 | G | A | 1 | 0.00052 | <i>CCDC14</i>         | missense variant      | p.Met460Thr  |
| 3 | 123699321 | chr3:123699321 | C | T | 1 | 0.00052 | <i>ROPN1</i>          | missense variant      | p.Gln3Arg    |
| 3 | 128979481 | rs760414395    | T | C | 1 | 0.00052 | <i>COPG1</i>          | missense variant      | p.Ser320Leu  |
| 3 | 133327754 | chr3:133327754 | A | G | 1 | 0.00052 | <i>TOPBP1</i>         | missense variant      | p.Ala1409Val |
| 3 | 133335724 | chr3:133335724 | C | T | 1 | 0.00055 | <i>TOPBP1</i>         | missense variant      | p.Ile1269Val |
| 3 | 133347439 | chr3:133347439 | T | C | 1 | 0.00052 | <i>TOPBP1</i>         | missense variant      | p.Ala887Thr  |
| 3 | 133376680 | chr3:133376680 | T | C | 1 | 0.00052 | <i>TOPBP1</i>         | missense variant      | p.Val109Ile  |
| 3 | 133377907 | chr3:133377907 | G | A | 1 | 0.00052 | <i>TOPBP1</i>         | missense variant      | p.Tyr58His   |
| 3 | 136574215 | rs140162609    | G | A | 1 | 0.00052 | <i>SLC35G2</i>        | missense variant      | p.Ile305Val  |
| 3 | 138116198 | chr3:138116198 | A | G | 1 | 0.00055 | <i>MRAS</i>           | missense variant      | p.Ala76Thr   |
| 3 | 138192431 | rs773319385    | G | A | 1 | 0.00052 | <i>ESYT3</i>          | missense variant      | p.Tyr764Cys  |
| 3 | 138338582 | chr3:138338582 | T | A | 1 | 0.00052 | <i>FAIM</i>           | missense variant      | p.Asp5Val    |
| 3 | 139280070 | rs761470404    | A | T | 1 | 0.00052 | <i>NMNAT3</i>         | missense variant      | p.Ile181Phe  |

|   |           |                |   |   |   |         |          |                       |              |
|---|-----------|----------------|---|---|---|---------|----------|-----------------------|--------------|
| 3 | 147121756 | chr3:147121756 | T | C | 1 | 0.00052 | ZIC4     | missense variant      | p.Glu44Lys   |
| 3 | 147131247 | chr3:147131247 | T | C | 1 | 0.00054 | ZIC1     | missense variant      | p.Thr418Ile  |
| 3 | 148759980 | chr3:148759980 | C | T | 1 | 0.00052 | HLTF     | missense variant      | p.Asn724Asp  |
| 3 | 148778593 | chr3:148778593 | C | T | 1 | 0.00052 | HLTF     | missense variant      | p.Thr405Ala  |
| 3 | 148793686 | chr3:148793686 | C | T | 1 | 0.00052 | HLTF     | missense variant      | p.Lys126Arg  |
| 3 | 148880486 | chr3:148880486 | A | G | 1 | 0.00052 | HPS3     | missense variant      | p.Ala768Thr  |
| 3 | 148889981 | chr3:148889981 | G | A | 1 | 0.00052 | HPS3     | missense variant      | p.Tyr996Cys  |
| 3 | 157082210 | rs767375080    | G | C | 1 | 0.00052 | VEPH1    | missense variant      | p.Val407Leu  |
| 3 | 157155302 | rs778015862    | A | C | 1 | 0.00056 | PTX3     | splice region variant | p.Pro44His   |
| 3 | 160395198 | rs199795781    | C | G | 1 | 0.00052 | ARL14    | missense variant      | p.Asp22His   |
| 3 | 160395595 | rs773095286    | G | A | 1 | 0.00052 | ARL14    | missense variant      | p.Gln154Arg  |
| 3 | 172163007 | chr3:172163007 | C | A | 1 | 0.00052 | GHSR     | missense variant      | p.Ser349Ala  |
| 3 | 172224304 | rs758781458    | T | A | 1 | 0.00052 | TNFSF10  | missense variant      | p.Phe275Tyr  |
| 3 | 175165038 | chr3:175165038 | A | G | 1 | 0.00052 | NAALADL2 | missense variant      | p.Arg371Gln  |
| 3 | 178957851 | rs3914675      | T | C | 1 | 0.00055 | KCNMB3   | splice region variant | p.Arg152His  |
| 3 | 186272723 | chr3:186272723 | A | C | 1 | 0.00052 | TBCCD1   | missense variant      | p.Cys337Phe  |
| 3 | 186314858 | chr3:186314858 | A | G | 1 | 0.00053 | DNAJB11  | missense variant      | p.Asp156Asn  |
| 3 | 186362569 | chr3:186362569 | T | C | 1 | 0.00052 | FETUB    | missense variant      | p.Pro152Ser  |
| 3 | 186457198 | chr3:186457198 | A | G | 1 | 0.00052 | KNG1     | missense variant      | p.Gly374Arg  |
| 3 | 186459931 | chr3:186459931 | C | G | 1 | 0.00052 | KNG1     | missense variant      | p.Gln582His  |
| 3 | 187088646 | chr3:187088646 | A | G | 1 | 0.00052 | RTP4     | missense variant      | p.Glu76Lys   |
| 3 | 188202428 | chr3:188202428 | C | T | 1 | 0.00052 | LPP      | missense variant      | p.Leu81Pro   |
| 3 | 190366297 | chr3:190366297 | A | G | 1 | 0.00052 | IL1RAP   | missense variant      | p.Val506Met  |
| 3 | 190373951 | chr3:190373951 | G | T | 1 | 0.00052 | IL1RAP   | missense variant      | p.Leu540Trp  |
| 3 | 190374046 | chr3:190374046 | G | A | 1 | 0.00052 | IL1RAP   | missense variant      | p.Arg572Gly  |
| 3 | 196534761 | chr3:196534761 | A | G | 1 | 0.00052 | PAK2     | missense variant      | p.Asp229Asn  |
| 3 | 196612156 | chr3:196612156 | G | A | 1 | 0.00052 | SENP5    | missense variant      | p.Gln35Arg   |
| 4 | 15060075  | chr4:15060075  | T | G | 1 | 0.00052 | CPEB2    | missense variant      | p.Ser831Ile  |
| 4 | 15443821  | rs752265309    | G | C | 1 | 0.00052 | C1QTNF7  | missense variant      | p.Leu97Val   |
| 4 | 15556750  | rs376403848    | T | A | 1 | 0.00052 | CC2D2A   | missense variant      | p.Met848Leu  |
| 4 | 15688863  | chr4:15688863  | C | T | 1 | 0.00053 | FAM200B  | missense variant      | p.Ile88Thr   |
| 4 | 15688937  | chr4:15688937  | T | G | 1 | 0.00054 | FAM200B  | stop gained           | p.Glu113*    |
| 4 | 15688940  | chr4:15688940  | A | C | 1 | 0.00054 | FAM200B  | missense variant      | p.Leu114Ile  |
| 4 | 26483291  | chr4:26483291  | T | C | 1 | 0.00053 | CCKAR    | missense variant      | p.Ser419Asn  |
| 4 | 36230220  | chr4:36230220  | G | T | 1 | 0.00052 | ARAP2    | missense variant      | p.Lys297Gln  |
| 4 | 36286149  | chr4:36286149  | G | A | 1 | 0.00053 | DTHD1    | missense variant      | p.Ile190Val  |
| 4 | 36292114  | chr4:36292114  | C | T | 1 | 0.00052 | DTHD1    | missense variant      | p.Val251Ala  |
| 4 | 36292306  | chr4:36292306  | T | G | 1 | 0.00052 | DTHD1    | missense variant      | p.Gly315Val  |
| 4 | 36309888  | chr4:36309888  | A | C | 1 | 0.00052 | DTHD1    | missense variant      | p.Ser538Tyr  |
| 4 | 36310070  | chr4:36310070  | A | G | 1 | 0.00052 | DTHD1    | missense variant      | p.Gly599Arg  |
| 4 | 36318049  | rs542659542    | C | G | 1 | 0.00052 | DTHD1    | missense variant      | p.Val676Leu  |
| 4 | 37445759  | rs780612415    | A | G | 1 | 0.00052 | KIAA1239 | missense variant      | p.Gly717Arg  |
| 4 | 38799470  | rs772351679    | T | A | 1 | 0.00052 | TLR1     | missense variant      | p.Ile328Asn  |
| 4 | 40104649  | rs772027051    | G | A | 1 | 0.00052 | N4BP2    | missense variant      | p.Tyr395Cys  |
| 4 | 40154468  | chr4:40154468  | A | G | 1 | 0.00052 | N4BP2    | missense variant      | p.Gly1738Arg |
| 4 | 54364834  | chr4:54364834  | T | G | 1 | 0.00052 | LNK1     | missense variant      | p.Leu318Ile  |
| 4 | 55141054  | rs201503614    | T | C | 1 | 0.00052 | PDGFRA   | missense variant      | p.Pro567Leu  |
| 4 | 55145007  | chr4:55145007  | G | T | 1 | 0.00052 | PDGFRA   | missense variant      | p.Ser726Arg  |
| 4 | 55973917  | chr4:55973917  | T | C | 1 | 0.00052 | KDR      | missense variant      | p.Ala467Thr  |
| 4 | 57777652  | chr4:57777652  | G | A | 1 | 0.00052 | REST     | missense variant      | p.Tyr283Cys  |
| 4 | 57797767  | rs372214552    | A | G | 1 | 0.00052 | REST     | missense variant      | p.Glu915Lys  |
| 4 | 57860919  | chr4:57860919  | T | A | 1 | 0.00052 | POLR2B   | missense variant      | p.Met155Leu  |
| 4 | 68379930  | rs777788368    | T | C | 1 | 0.00052 | CENPC    | missense variant      | p.Val436Met  |
| 4 | 68383899  | chr4:68383899  | G | T | 1 | 0.00053 | CENPC    | missense variant      | p.Thr269Pro  |
| 4 | 74306380  | chr4:74306380  | G | C | 1 | 0.00052 | AFP      | stop gained           | p.Ser111*    |
| 4 | 74351688  | rs758736794    | C | A | 1 | 0.00052 | AFM      | missense variant      | p.Tyr127Ser  |
| 4 | 74853246  | rs781398672    | C | T | 1 | 0.00052 | PPBP     | missense variant      | p.Gln91Arg   |
| 4 | 74964321  | rs201836008    | G | T | 1 | 0.00052 | CXCL2    | missense variant      | p.Lys102Thr  |
| 4 | 76878845  | rs773963650    | G | C | 1 | 0.00052 | SDAD1    | missense variant      | p.Ser532Thr  |
| 4 | 79443912  | rs752144269    | C | G | 1 | 0.00052 | FRAS1    | missense variant      | p.Gln3586His |
| 4 | 79461724  | chr4:79461724  | T | A | 1 | 0.00054 | FRAS1    | missense variant      | p.Ile3829Phe |
| 4 | 80940090  | chr4:80940090  | G | C | 1 | 0.00052 | ANTXR2   | missense variant      | p.Val303Leu  |
| 4 | 95185874  | chr4:95185874  | G | A | 1 | 0.00052 | SMARCAD1 | missense variant      | p.Lys433Arg  |
| 4 | 100460497 | chr4:100460497 | G | C | 1 | 0.00052 | C4orf17  | missense variant      | p.Thr269Ser  |
| 4 | 101109090 | chr4:101109090 | G | T | 1 | 0.00052 | DDIT4L   | missense variant      | p.His109Pro  |
| 4 | 103517325 | chr4:103517325 | T | C | 1 | 0.00052 | NFKB1    | missense variant      | p.Pro444Leu  |
| 4 | 103533671 | chr4:103533671 | T | G | 1 | 0.00052 | NFKB1    | missense variant      | p.Ala834Ser  |

|   |           |                |   |   |   |         |                     |                       |              |
|---|-----------|----------------|---|---|---|---------|---------------------|-----------------------|--------------|
| 4 | 109862577 | chr4:109862577 | G | A | 1 | 0.00052 | <i>COL25A1</i>      | missense variant      | p.Ile170Thr  |
| 4 | 110603878 | chr4:110603878 | T | C | 1 | 0.00052 | <i>CCDC109B</i>     | stop gained           | p.Gln198*    |
| 4 | 110763628 | chr4:110763628 | A | T | 1 | 0.00052 | <i>RRH</i>          | missense variant      | p.Ser242Thr  |
| 4 | 110902062 | rs762841951    | T | C | 1 | 0.00052 | <i>EGF</i>          | missense variant      | p.Arg768Cys  |
| 4 | 123301319 | rs375116122    | T | C | 1 | 0.00052 | <i>ADAD1</i>        | missense variant      | p.Thr32Met   |
| 4 | 123542049 | chr4:123542049 | A | G | 1 | 0.00052 | <i>IL21</i>         | missense variant      | p.Arg40Cys   |
| 4 | 154624499 | rs751213268    | T | A | 1 | 0.00052 | <i>TLR2</i>         | missense variant      | p.His147Leu  |
| 4 | 154624940 | rs755459719    | G | A | 1 | 0.00054 | <i>TLR2</i>         | missense variant      | p.Asn294Ser  |
| 4 | 158142850 | chr4:158142850 | T | A | 1 | 0.00052 | <i>GRIA2</i>        | missense variant      | p.Glu40Asp   |
| 4 | 177608376 | chr4:177608376 | A | C | 1 | 0.00052 | <i>VEGFC</i>        | missense variant      | p.Leu370Phe  |
| 4 | 185599443 | chr4:185599443 | T | G | 1 | 0.00053 | <i>PRIMPOL</i>      | missense variant      | p.Arg301Leu  |
| 4 | 187003717 | chr4:187003717 | C | T | 1 | 0.00052 | <i>TLR3</i>         | missense variant      | p.Ser293Pro  |
| 4 | 187004453 | chr4:187004453 | T | A | 1 | 0.00052 | <i>TLR3</i>         | missense variant      | p.Gln538Leu  |
| 4 | 187070358 | chr4:187070358 | A | G | 1 | 0.00053 | <i>FAM149A</i>      | missense variant      | p.Gly200Ser  |
| 4 | 187074872 | rs140771382    | A | G | 1 | 0.00056 | <i>FAM149A</i>      | missense variant      | p.Ala345Thr  |
| 5 | 640631    | chr5:640631    | G | T | 1 | 0.00056 | <i>CEP72</i>        | missense variant      | p.Leu484Arg  |
| 5 | 7897206   | chr5:7897206   | A | G | 1 | 0.00052 | <i>MTRR</i>         | missense variant      | p.Gly627Arg  |
| 5 | 7897207   | chr5:7897207   | T | G | 1 | 0.00052 | <i>MTRR</i>         | missense variant      | p.Gly627Val  |
| 5 | 33453434  | chr5:33453434  | G | A | 1 | 0.00052 | <i>TARS</i>         | missense variant      | p.Asn157Asp  |
| 5 | 34935865  | chr5:34935865  | G | A | 1 | 0.00052 | <i>DNAJC21</i>      | missense variant      | p.Tyr81Cys   |
| 5 | 35807015  | rs555353539    | C | A | 1 | 0.00052 | <i>SPEF2</i>        | missense variant      | p.Arg1739Ser |
| 5 | 37333578  | chr5:37333578  | T | A | 1 | 0.00052 | <i>NUP155</i>       | missense variant      | p.Leu502His  |
| 5 | 37443473  | chr5:37443473  | G | T | 1 | 0.00052 | <i>WDR70</i>        | splice region variant | p.Cys229Gly  |
| 5 | 38511918  | chr5:38511918  | A | T | 1 | 0.00052 | <i>LIFR</i>         | missense variant      | p.Asp237Val  |
| 5 | 38919318  | rs556983548    | T | C | 1 | 0.00054 | <i>OSMR</i>         | missense variant      | p.Thr139Met  |
| 5 | 39134434  | chr5:39134434  | C | T | 1 | 0.00052 | <i>FYB</i>          | missense variant      | p.Thr575Ala  |
| 5 | 39202725  | chr5:39202725  | G | A | 1 | 0.00052 | <i>FYB</i>          | missense variant      | p.Val123Ala  |
| 5 | 39341377  | rs533953561    | T | C | 1 | 0.00052 | <i>C9</i>           | missense variant      | p.Arg116Gln  |
| 5 | 40765321  | chr5:40765321  | C | G | 1 | 0.00054 | <i>PRKAA1</i>       | missense variant      | p.Gln296Glu  |
| 5 | 41057219  | chr5:41057219  | G | A | 1 | 0.00052 | <i>MROH2B</i>       | missense variant      | p.Leu304Pro  |
| 5 | 41159192  | rs76528010     | T | C | 1 | 0.00052 | <i>C6</i>           | missense variant      | p.Met616Ile  |
| 5 | 41159339  | rs80108105     | G | C | 1 | 0.00052 | <i>C6</i>           | missense variant      | p.Gln567His  |
| 5 | 41186246  | rs756731027    | G | A | 1 | 0.00052 | <i>C6</i>           | missense variant      | p.Cys218Arg  |
| 5 | 42800968  | rs770189876    | A | G | 1 | 0.00052 | <i>SEPP1</i>        | missense variant      | p.Arg334Trp  |
| 5 | 52235441  | rs756236797    | G | A | 1 | 0.00052 | <i>ITGA1</i>        | missense variant      | p.Ile1034Val |
| 5 | 54527256  | chr5:54527256  | G | T | 1 | 0.00053 | <i>CCNO</i>         | missense variant      | p.Met334Leu  |
| 5 | 56177920  | chr5:56177920  | T | C | 1 | 0.00052 | <i>MAP3K1</i>       | stop gained           | p.Gln965*    |
| 5 | 66391496  | rs370889678    | T | C | 1 | 0.00052 | <i>MAST4</i>        | missense variant      | p.Thr305Met  |
| 5 | 66398343  | rs760008201    | A | G | 1 | 0.00052 | <i>MAST4</i>        | missense variant      | p.Gly166Glu  |
| 5 | 68555753  | chr5:68555753  | A | G | 1 | 0.00052 | <i>CDK7</i>         | missense variant      | p.Val173Ile  |
| 5 | 75913572  | chr5:75913572  | C | A | 1 | 0.00052 | <i>F2RL2</i>        | missense variant      | p.Ile320Met  |
| 5 | 76128892  | chr5:76128892  | G | T | 1 | 0.00052 | <i>F2RL1</i>        | missense variant      | p.Phe154Val  |
| 5 | 77396783  | chr5:77396783  | T | C | 1 | 0.00053 | <i>AP3B1</i>        | missense variant      | p.Asp822Asn  |
| 5 | 77458708  | chr5:77458708  | A | G | 1 | 0.00052 | <i>AP3B1</i>        | missense variant      | p.Thr433Ile  |
| 5 | 77536756  | chr5:77536756  | G | A | 1 | 0.00052 | <i>AP3B1</i>        | missense variant      | p.Ile70Thr   |
| 5 | 82786220  | rs201689008    | T | C | 1 | 0.00052 | <i>VCAN</i>         | missense variant      | p.Ala125Val  |
| 5 | 82837383  | rs771479305    | C | T | 1 | 0.00052 | <i>VCAN</i>         | missense variant      | p.Val2854Ala |
| 5 | 82841445  | rs773830482    | C | T | 1 | 0.00052 | <i>VCAN</i>         | missense variant      | p.Tyr3119His |
| 5 | 82841454  | rs770608370    | A | G | 1 | 0.00052 | <i>VCAN</i>         | missense variant      | p.Asp3122Asn |
| 5 | 96232165  | rs757590989    | T | C | 1 | 0.00052 | <i>ERAP2</i>        | missense variant      | p.Pro443Leu  |
| 5 | 96235881  | chr5:96235881  | A | G | 1 | 0.00052 | <i>ERAP2</i>        | missense variant      | p.Met520Ile  |
| 5 | 108207125 | chr5:108207125 | G | A | 1 | 0.00052 | <i>FER</i>          | missense variant      | p.Asn242Ser  |
| 5 | 108380408 | chr5:108380408 | T | A | 1 | 0.00052 | <i>FER</i>          | missense variant      | p.Thr581Ser  |
| 5 | 110428236 | chr5:110428236 | A | C | 1 | 0.00052 | <i>WDR36</i>        | missense variant      | p.Pro84Thr   |
| 5 | 114952121 | chr5:114952121 | C | T | 1 | 0.00053 | <i>TMED7-TICAM2</i> | missense variant      | p.Ile154Val  |
| 5 | 131676324 | chr5:131676324 | T | C | 1 | 0.00052 | <i>SLC22A4</i>      | missense variant      | p.Thr504Ile  |
| 5 | 131977997 | chr5:131977997 | C | G | 1 | 0.00052 | <i>RAD50</i>        | missense variant      | p.Asp1294His |
| 5 | 132052578 | rs759314163    | A | T | 1 | 0.00052 | <i>KIF3A</i>        | missense variant      | p.Met239Leu  |
| 5 | 137519998 | chr5:137519998 | G | C | 1 | 0.00052 | <i>KIF20A</i>       | missense variant      | p.Arg475Gly  |
| 5 | 138163340 | chr5:138163340 | T | G | 1 | 0.00053 | <i>CTNNA1</i>       | missense variant      | p.Arg332Leu  |
| 5 | 138210173 | rs371492043    | G | A | 1 | 0.00052 | <i>LRRTM2</i>       | missense variant      | p.Met26Thr   |
| 5 | 139930668 | chr5:139930668 | G | C | 1 | 0.00052 | <i>SRA1</i>         | missense variant      | p.Lys159Asn  |
| 5 | 140035567 | chr5:140035567 | G | C | 1 | 0.00052 | <i>IK</i>           | missense variant      | p.Pro264Arg  |
| 5 | 140038586 | rs755395781    | A | G | 1 | 0.00052 | <i>IK</i>           | missense variant      | p.Arg338Gln  |
| 5 | 140073232 | chr5:140073232 | C | T | 1 | 0.00052 | <i>HARS2</i>        | missense variant      | p.Tyr89His   |
| 5 | 140797677 | chr5:140797677 | A | T | 1 | 0.00052 | <i>PCDHGB7</i>      | stop gained           | p.Leu84*     |
| 5 | 140798911 | chr5:140798911 | A | C | 1 | 0.00056 | <i>PCDHGB7</i>      | missense variant      | p.Asp495Glu  |
| 5 | 140870891 | rs762200164    | C | T | 1 | 0.00053 | <i>PCDHGC5</i>      | missense variant      | p.Ile695Thr  |



|   |           |                |   |   |   |         |                 |                       |              |
|---|-----------|----------------|---|---|---|---------|-----------------|-----------------------|--------------|
| 5 | 142780394 | chr5:142780394 | C | T | 1 | 0.00052 | <i>NR3C1</i>    | missense variant      | p.Lys4Arg    |
| 5 | 149274824 | chr5:149274824 | T | A | 1 | 0.00052 | <i>PDE6A</i>    | missense variant      | p.Ser550Arg  |
| 5 | 149375800 | chr5:149375800 | T | C | 1 | 0.00055 | <i>TIGD6</i>    | missense variant      | p.Gly38Ser   |
| 5 | 149384453 | rs766913056    | G | T | 1 | 0.00052 | <i>HMGXB3</i>   | missense variant      | p.Val13Gly   |
| 5 | 149429906 | chr5:149429906 | G | A | 1 | 0.00054 | <i>HMGXB3</i>   | missense variant      | p.Tyr1098Cys |
| 5 | 149431355 | chr5:149431355 | A | T | 1 | 0.00052 | <i>HMGXB3</i>   | missense variant      | p.Ile1160Asn |
| 5 | 150406568 | chr5:150406568 | A | C | 1 | 0.00052 | <i>GPX3</i>     | missense variant      | p.Pro117Thr  |
| 5 | 156566152 | chr5:156566152 | C | T | 1 | 0.00052 | <i>MED7</i>     | missense variant      | p.Ile97Met   |
| 5 | 156589871 | rs201052186    | T | A | 1 | 0.00052 | <i>FAM71B</i>   | missense variant      | p.Ser469Thr  |
| 5 | 156671418 | rs772726821    | C | T | 1 | 0.00052 | <i>ITK</i>      | missense variant      | p.Leu460Pro  |
| 5 | 179201217 | rs578226932    | G | A | 1 | 0.00055 | <i>MAML1</i>    | missense variant      | p.Tyr797Cys  |
| 5 | 179663388 | chr5:179663388 | G | C | 1 | 0.00052 | <i>MAPK9</i>    | missense variant      | p.Arg424Pro  |
| 5 | 180664023 | rs770353665    | A | G | 1 | 0.00052 | <i>GNB2L1</i>   | missense variant      | p.Thr321Met  |
| 6 | 3012847   | chr6:3012847   | C | T | 1 | 0.00052 | <i>NQO2</i>     | missense variant      | p.Leu81Pro   |
| 6 | 3127508   | chr6:3127508   | G | A | 1 | 0.00052 | <i>BPHL</i>     | missense variant      | p.Lys82Glu   |
| 6 | 15523376  | rs74907982     | A | G | 1 | 0.00052 | <i>DTNBP1</i>   | missense variant      | p.Pro297Ser  |
| 6 | 20546621  | chr6:20546621  | A | G | 1 | 0.00052 | <i>CDKAL1</i>   | missense variant      | p.Glu14Lys   |
| 6 | 21231095  | chr6:21231095  | C | T | 1 | 0.00053 | <i>CDKAL1</i>   | missense variant      | p.Leu522Pro  |
| 6 | 21231134  | chr6:21231134  | T | C | 1 | 0.00053 | <i>CDKAL1</i>   | missense variant      | p.Ala535Val  |
| 6 | 24559241  | rs773691612    | G | C | 1 | 0.00052 | <i>KIAA0319</i> | splice region variant | p.Gly912Arg  |
| 6 | 30514598  | rs375873464    | T | C | 1 | 0.00053 | <i>GNL1</i>     | missense variant      | p.Arg486His  |
| 6 | 30878374  | rs773111203    | G | C | 1 | 0.00055 | <i>GTF2H4</i>   | splice region variant | p.Thr126Arg  |
| 6 | 30883526  | chr6:30883526  | G | C | 1 | 0.00052 | <i>VARS2</i>    | missense variant      | p.Arg160Gly  |
| 6 | 30885568  | rs527633192    | A | G | 1 | 0.00052 | <i>VARS2</i>    | missense variant      | p.Val354Met  |
| 6 | 30893952  | rs761841915    | A | G | 1 | 0.00054 | <i>VARS2</i>    | missense variant      | p.Asp1083Asn |
| 6 | 31084556  | chr6:31084556  | A | G | 1 | 0.00053 | <i>CDSN</i>     | missense variant      | p.Pro279Leu  |
| 6 | 31474073  | chr6:31474073  | A | C | 1 | 0.00052 | <i>MICB</i>     | missense variant      | p.Thr160Asn  |
| 6 | 31603991  | chr6:31603991  | T | A | 1 | 0.00053 | <i>PRRC2A</i>   | missense variant      | p.Gln1877Leu |
| 6 | 31603999  | rs769170351    | C | T | 1 | 0.00054 | <i>PRRC2A</i>   | missense variant      | p.Tyr1880His |
| 6 | 31611688  | chr6:31611688  | A | G | 1 | 0.00053 | <i>BAG6</i>     | missense variant      | p.Leu579Phe  |
| 6 | 31727879  | chr6:31727879  | A | G | 1 | 0.00052 | <i>MSH5</i>     | missense variant      | p.Met583Ile  |
| 6 | 32065606  | chr6:32065606  | T | C | 1 | 0.00052 | <i>TNXB</i>     | missense variant      | p.Gly124Arg  |
| 6 | 32261258  | chr6:32261258  | T | C | 1 | 0.00052 | <i>C6orf10</i>  | missense variant      | p.Val398Ile  |
| 6 | 32411152  | chr6:32411152  | G | C | 1 | 0.00052 | <i>HLA-DRA</i>  | missense variant      | p.Phe173Leu  |
| 6 | 32610413  | chr6:32610413  | A | G | 1 | 0.00052 | <i>HLA-DQA1</i> | missense variant      | p.Glu214Lys  |
| 6 | 32813369  | chr6:32813369  | A | T | 1 | 0.00052 | <i>TAP1</i>     | missense variant      | p.Asp805Val  |
| 6 | 33170472  | chr6:33170472  | T | G | 1 | 0.00054 | <i>SLC39A7</i>  | missense variant      | p.Gly312Val  |
| 6 | 33259953  | chr6:33259953  | A | G | 1 | 0.00053 | <i>RGL2</i>     | missense variant      | p.Pro754Ser  |
| 6 | 33289632  | rs201782741    | A | G | 1 | 0.00053 | <i>DAXX</i>     | missense variant      | p.Pro24Leu   |
| 6 | 33373314  | rs775737916    | C | A | 1 | 0.00055 | <i>KIFC1</i>    | missense variant      | p.Gln481Pro  |
| 6 | 35391806  | chr6:35391806  | A | C | 1 | 0.00057 | <i>PPARD</i>    | missense variant      | p.Pro170Thr  |
| 6 | 39883943  | rs772980797    | G | A | 1 | 0.00053 | <i>MOCS1</i>    | missense variant      | p.Ile151Thr  |
| 6 | 47251698  | chr6:47251698  | G | A | 1 | 0.00052 | <i>TNFRSF21</i> | missense variant      | p.Trp407Arg  |
| 6 | 47541896  | rs770123305    | A | G | 1 | 0.00052 | <i>CD2AP</i>    | missense variant      | p.Gly213Glu  |
| 6 | 52619853  | chr6:52619853  | T | G | 1 | 0.00052 | <i>GSTA2</i>    | missense variant      | p.Gln54Lys   |
| 6 | 75890736  | rs758201181    | C | T | 1 | 0.00052 | <i>COL12A1</i>  | missense variant      | p.Thr695Ala  |
| 6 | 76576729  | rs748073974    | G | A | 1 | 0.00052 | <i>MYO6</i>     | missense variant      | p.Ile617Met  |
| 6 | 76596608  | chr6:76596608  | C | A | 1 | 0.00052 | <i>MYO6</i>     | missense variant      | p.Lys852Thr  |
| 6 | 84368754  | rs771692440    | C | T | 1 | 0.00052 | <i>SNAP91</i>   | missense variant      | p.Ile170Met  |
| 6 | 91260258  | rs755212534    | T | C | 1 | 0.00052 | <i>MAP3K7</i>   | missense variant      | p.Gly293Glu  |
| 6 | 111912986 | rs573038591    | C | G | 1 | 0.00052 | <i>TRAF3IP2</i> | missense variant      | p.Leu111Val  |
| 6 | 123653072 | chr6:123653072 | C | G | 1 | 0.00052 | <i>TRDN</i>     | splice region variant | p.Pro475Ala  |
| 6 | 123818364 | chr6:123818364 | G | A | 1 | 0.00053 | <i>TRDN</i>     | missense variant      | p.Ile276Thr  |
| 6 | 136687472 | rs751440841    | A | G | 1 | 0.00052 | <i>MAP7</i>     | stop gained           | p.Arg350*    |
| 6 | 137147510 | chr6:137147510 | T | A | 1 | 0.00052 | <i>PEX7</i>     | missense variant      | p.His81Leu   |
| 6 | 137476140 | rs141572567    | A | G | 1 | 0.00052 | <i>IL2RA2</i>   | missense variant      | p.Ala137Val  |
| 6 | 137524806 | chr6:137524806 | G | A | 1 | 0.00052 | <i>IFNGR1</i>   | missense variant      | p.Leu188Pro  |
| 6 | 138192497 | chr6:138192497 | T | C | 1 | 0.00052 | <i>TNFAIP3</i>  | stop gained           | p.Arg45*     |
| 6 | 151914315 | chr6:151914315 | G | T | 1 | 0.00052 | <i>CCDC170</i>  | missense variant      | p.Met456Arg  |
| 6 | 154763322 | rs776457984    | G | C | 1 | 0.00053 | <i>CNKSR3</i>   | missense variant      | p.Ala107Pro  |
| 6 | 158323039 | chr6:158323039 | A | T | 1 | 0.00052 | <i>SNX9</i>     | missense variant      | p.Ser194Arg  |
| 6 | 159457400 | rs754875937    | T | C | 1 | 0.00053 | <i>TAGAP</i>    | missense variant      | p.Arg552Gln  |
| 6 | 161135891 | chr6:161135891 | T | G | 1 | 0.00052 | <i>PLG</i>      | stop gained           | p.Glu205*    |
| 6 | 168312072 | rs747756056    | T | C | 1 | 0.00052 | <i>MLLT4</i>    | missense variant      | p.Ser646Phe  |
| 6 | 168349154 | chr6:168349154 | A | T | 1 | 0.00052 | <i>MLLT4</i>    | missense variant      | p.Ile1268Asn |
| 6 | 168363211 | rs770828342    | C | G | 1 | 0.00052 | <i>MLLT4</i>    | missense variant      | p.Gln1647His |

|   |           |                |   |   |   |         |                |                       |              |
|---|-----------|----------------|---|---|---|---------|----------------|-----------------------|--------------|
| 6 | 170844456 | rs576330081    | A | G | 1 | 0.00052 | <i>PSMB1</i>   | missense variant      | p.Pro193Leu  |
| 6 | 170888039 | chr6:170888039 | G | C | 1 | 0.00052 | <i>PDCD2</i>   | missense variant      | p.Gly261Ala  |
| 7 | 1784536   | chr7:1784536   | A | G | 1 | 0.00058 | <i>ELFN1</i>   | missense variant      | p.Gly102Ser  |
| 7 | 2269759   | rs747588764    | T | G | 1 | 0.00053 | <i>MAD1L1</i>  | missense variant      | p.Leu4Met    |
| 7 | 2771015   | chr7:2771015   | T | C | 1 | 0.00053 | <i>GNA12</i>   | missense variant      | p.Asp316Asn  |
| 7 | 2834725   | chr7:2834725   | C | T | 1 | 0.00053 | <i>GNA12</i>   | missense variant      | p.Tyr121Cys  |
| 7 | 6472582   | chr7:6472582   | G | A | 1 | 0.00053 | <i>DAGLB</i>   | missense variant      | p.Ile143Thr  |
| 7 | 6476036   | chr7:6476036   | T | C | 1 | 0.00052 | <i>DAGLB</i>   | missense variant      | p.Asp126Asn  |
| 7 | 17373722  | rs755496764    | G | A | 1 | 0.00052 | <i>AHR</i>     | missense variant      | p.Ile298Val  |
| 7 | 22200139  | chr7:22200139  | T | C | 1 | 0.00052 | <i>RAPGEF5</i> | missense variant      | p.Arg355His  |
| 7 | 22233141  | chr7:22233141  | A | C | 1 | 0.00052 | <i>RAPGEF5</i> | missense variant      | p.Asp47Tyr   |
| 7 | 22330856  | rs776635634    | A | G | 1 | 0.00052 | <i>RAPGEF5</i> | missense variant      | p.His76Tyr   |
| 7 | 38468970  | rs747027899    | C | T | 1 | 0.00053 | <i>AMPH</i>    | missense variant      | p.Ile214Val  |
| 7 | 50547491  | chr7:50547491  | T | C | 1 | 0.00052 | <i>DDC</i>     | missense variant      | p.Asp339Asn  |
| 7 | 55240758  | rs746757722    | G | A | 1 | 0.00057 | <i>EGFR</i>    | missense variant      | p.Met668Val  |
| 7 | 73654389  | rs781896174    | A | G | 1 | 0.00053 | <i>RFC2</i>    | missense variant      | p.Thr191Ile  |
| 7 | 80088004  | rs761633220    | G | C | 1 | 0.00052 | <i>GNAT3</i>   | missense variant      | p.Asp350His  |
| 7 | 80378261  | chr7:80378261  | T | C | 1 | 0.00052 | <i>SEMA3C</i>  | missense variant      | p.Ala617Thr  |
| 7 | 87168613  | chr7:87168613  | G | A | 1 | 0.00052 | <i>ABCB1</i>   | missense variant      | p.Tyr790His  |
| 7 | 87173539  | rs773899676    | T | G | 1 | 0.00052 | <i>ABCB1</i>   | missense variant      | p.Thr706Asn  |
| 7 | 87196151  | rs200823786    | C | T | 1 | 0.00052 | <i>ABCB1</i>   | missense variant      | p.Ile160Met  |
| 7 | 91503429  | rs761977328    | C | G | 1 | 0.00052 | <i>MTERF</i>   | missense variant      | p.His227Asp  |
| 7 | 91670175  | chr7:91670175  | G | A | 1 | 0.00052 | <i>AKAP9</i>   | missense variant      | p.Gln1639Arg |
| 7 | 91715717  | chr7:91715717  | A | G | 1 | 0.00053 | <i>AKAP9</i>   | missense variant      | p.Arg3071Lys |
| 7 | 91718772  | chr7:91718772  | T | C | 1 | 0.00052 | <i>AKAP9</i>   | missense variant      | p.Ala3100Val |
| 7 | 91794015  | chr7:91794015  | G | A | 1 | 0.00056 | <i>LRRD1</i>   | missense variant      | p.Tyr168His  |
| 7 | 92163724  | rs182459371    | A | G | 1 | 0.00052 | <i>RBM48</i>   | missense variant      | p.Val153Met  |
| 7 | 99655414  | chr7:99655414  | T | C | 1 | 0.00052 | <i>ZSCAN21</i> | missense variant      | p.Pro165Ser  |
| 7 | 99669713  | chr7:99669713  | A | G | 1 | 0.00052 | <i>ZNF3</i>    | stop gained           | p.Arg132*    |
|   |           |                |   |   |   |         |                | missense variant &    |              |
| 7 | 99703161  | rs373162905    | T | C | 1 | 0.00054 | <i>AP4M1</i>   | splice region variant | p.Arg317Trp  |
| 7 | 99717341  | chr7:99717341  | T | G | 1 | 0.00052 | <i>TAF6</i>    | missense variant      | p.Thr10Asn   |
| 7 | 99764673  | chr7:99764673  | A | G | 1 | 0.00056 | <i>GAL3ST4</i> | missense variant      | p.Arg16Trp   |
| 7 | 99767965  | rs778573008    | T | C | 1 | 0.00056 | <i>GPC2</i>    | missense variant      | p.Ser543Asn  |
| 7 | 100416243 | rs541670683    | A | G | 1 | 0.00056 | <i>EPHB4</i>   | missense variant      | p.Arg441Trp  |
| 7 | 103113308 | chr7:103113308 | G | A | 1 | 0.00052 | <i>RELN</i>    | missense variant      | p.Leu3445Pro |
|   |           |                |   |   |   |         |                | missense variant &    |              |
| 7 | 103197606 | rs774088356    | T | C | 1 | 0.00052 | <i>RELN</i>    | splice region variant | p.Ser1872Asn |
| 7 | 103252239 | chr7:103252239 | A | T | 1 | 0.00052 | <i>RELN</i>    | missense variant      | p.Asp905Val  |
| 7 | 107671415 | chr7:107671415 | A | G | 1 | 0.00052 | <i>LAMB4</i>   | stop gained           | p.Gln1610*   |
| 7 | 107706234 | rs765832432    | C | T | 1 | 0.00052 | <i>LAMB4</i>   | missense variant      | p.Ile937Val  |
| 7 | 107706917 | rs755148173    | C | T | 1 | 0.00052 | <i>LAMB4</i>   | missense variant      | p.Ser859Gly  |
| 7 | 115889084 | rs142430563    | T | C | 1 | 0.00052 | <i>TES</i>     | missense variant      | p.Arg42Cys   |
| 7 | 116146049 | rs759051961    | G | C | 1 | 0.00052 | <i>CAV2</i>    | missense variant      | p.Leu59Val   |
| 7 | 116397800 | chr7:116397800 | G | A | 1 | 0.00052 | <i>MET</i>     | missense variant      | p.Ile692Val  |
|   |           |                |   |   |   |         |                | missense variant &    |              |
| 7 | 116829445 | chr7:116829445 | A | C | 1 | 0.00052 | <i>ST7</i>     | splice region variant | p.Asp383Glu  |
| 7 | 123301938 | chr7:123301938 | A | G | 1 | 0.00052 | <i>LMOD2</i>   | missense variant      | p.Glu100Lys  |
| 7 | 123302077 | chr7:123302077 | A | G | 1 | 0.00052 | <i>LMOD2</i>   | missense variant      | p.Gly146Glu  |
| 7 | 123332562 | chr7:123332562 | G | C | 1 | 0.00054 | <i>WASL</i>    | missense variant      | p.Asp396His  |
| 7 | 123594181 | chr7:123594181 | G | A | 1 | 0.00052 | <i>SPAM1</i>   | missense variant      | p.Glu186Gly  |
| 7 | 128483963 | chr7:128483963 | G | T | 1 | 0.00053 | <i>FLNC</i>    | missense variant      | p.Asn975Lys  |
| 7 | 135078895 | chr7:135078895 | C | T | 1 | 0.00052 | <i>CNOT4</i>   | missense variant      | p.Thr468Ala  |
| 7 | 135095310 | rs184784256    | G | A | 1 | 0.00053 | <i>CNOT4</i>   | missense variant      | p.Val259Ala  |
| 7 | 140378974 | chr7:140378974 | T | C | 1 | 0.00052 | <i>ADCK2</i>   | missense variant      | p.Ala367Val  |
| 7 | 142965270 | chr7:142965270 | A | C | 1 | 0.00053 | <i>GSTK1</i>   | missense variant      | p.His264Gln  |
| 7 | 142988749 | rs759719769    | G | A | 1 | 0.00052 | <i>CASP2</i>   | missense variant      | p.Asp64Gly   |
| 7 | 143053968 | chr7:143053968 | G | A | 1 | 0.00052 | <i>FAM131B</i> | missense variant      | p.Phe253Ser  |
| 7 | 154739693 | chr7:154739693 | A | G | 1 | 0.00052 | <i>PAXIP1</i>  | stop gained           | p.Arg948*    |
| 7 | 154760232 | chr7:154760232 | A | G | 1 | 0.00059 | <i>PAXIP1</i>  | missense variant      | p.Thr560Met  |
| 8 | 3205621   | chr8:3205621   | G | T | 1 | 0.00052 | <i>CSMD1</i>   | missense variant      | p.Asn1124His |
| 8 | 3265630   | chr8:3265630   | T | C | 1 | 0.00052 | <i>CSMD1</i>   | missense variant      | p.Arg622Gln  |
| 8 | 3443747   | rs777685797    | C | T | 1 | 0.00052 | <i>CSMD1</i>   | missense variant      | p.Asn379Ser  |
| 8 | 11679272  | chr8:11679272  | C | T | 1 | 0.00052 | <i>FDFT1</i>   | missense variant      | p.Phe132Ser  |
| 8 | 17794782  | chr8:17794782  | T | C | 1 | 0.00052 | <i>PCM1</i>    | missense variant      | p.Thr79Ile   |
| 8 | 17796371  | rs781151340    | A | T | 1 | 0.00052 | <i>PCM1</i>    | missense variant      | p.Asp155Glu  |
| 8 | 17830188  | rs778689206    | G | A | 1 | 0.00053 | <i>PCM1</i>    | missense variant      | p.Lys1312Arg |
| 8 | 27321446  | chr8:27321446  | A | G | 1 | 0.00056 | <i>CHRNA2</i>  | missense variant      | p.His172Tyr  |

|   |           |                |   |   |   |         |                 |                                          |              |
|---|-----------|----------------|---|---|---|---------|-----------------|------------------------------------------|--------------|
| 8 | 27361123  | rs759198021    | A | G | 1 | 0.00052 | <i>EPHX2</i>    | stop gained & splice region variant      | p.Trp63*     |
| 8 | 32621624  | chr8:32621624  | C | A | 1 | 0.00052 | <i>NRG1</i>     | missense variant                         | p.Asn616His  |
| 8 | 38001870  | rs551783234    | G | A | 1 | 0.00053 | <i>STAR</i>     | missense variant                         | p.Leu260Pro  |
| 8 | 38005831  | chr8:38005831  | T | C | 1 | 0.00053 | <i>STAR</i>     | missense variant                         | p.Glu65Lys   |
| 8 | 38258525  | chr8:38258525  | A | G | 1 | 0.00052 | <i>LETM2</i>    | missense variant                         | p.Arg313His  |
| 8 | 42037762  | rs771818476    | G | A | 1 | 0.00052 | <i>PLAT</i>     | missense variant & splice region variant | p.Ile407Thr  |
| 8 | 42178255  | chr8:42178255  | A | G | 1 | 0.00054 | <i>IKBKB</i>    | missense variant & splice region variant | p.Glu507Lys  |
| 8 | 42188891  | chr8:42188891  | A | G | 1 | 0.00052 | <i>IKBKB</i>    | missense variant                         | p.Arg91His   |
| 8 | 42218813  | chr8:42218813  | A | G | 1 | 0.00052 | <i>POLB</i>     | missense variant & splice region variant | p.Gly184Asp  |
| 8 | 48719878  | chr8:48719878  | C | A | 1 | 0.00052 | <i>PRKDC</i>    | missense variant                         | p.Phe3188Leu |
| 8 | 48798584  | rs775866201    | A | G | 1 | 0.00053 | <i>PRKDC</i>    | missense variant                         | p.Thr1565Met |
| 8 | 56699017  | rs769149695    | T | C | 1 | 0.00052 | <i>TGS1</i>     | missense variant                         | p.Thr187Ile  |
| 8 | 71499372  | chr8:71499372  | C | G | 1 | 0.00052 | <i>TRAM1</i>    | missense variant                         | p.Leu204Val  |
| 8 | 73849779  | chr8:73849779  | A | C | 1 | 0.00054 | <i>KCNB2</i>    | missense variant                         | p.Pro730Gln  |
| 8 | 73850063  | chr8:73850063  | G | A | 1 | 0.00052 | <i>KCNB2</i>    | missense variant                         | p.Lys825Glu  |
| 8 | 90775067  | rs764903626    | A | G | 1 | 0.00052 | <i>RIPK2</i>    | missense variant                         | p.Asp62Asn   |
| 8 | 99217434  | rs762122486    | G | C | 1 | 0.00053 | <i>NIPAL2</i>   | missense variant                         | p.Met232Ile  |
| 8 | 99224722  | chr8:99224722  | C | T | 1 | 0.00054 | <i>NIPAL2</i>   | missense variant                         | p.Glu189Gly  |
| 8 | 124790298 | chr8:124790298 | G | A | 1 | 0.00052 | <i>FAM91A1</i>  | missense variant                         | p.Tyr134Cys  |
| 8 | 124824771 | chr8:124824771 | G | A | 1 | 0.00053 | <i>FAM91A1</i>  | missense variant                         | p.Ile782Val  |
| 8 | 131193082 | chr8:131193082 | A | C | 1 | 0.00052 | <i>ASAP1</i>    | missense variant                         | p.Gly192Val  |
| 8 | 133823311 | chr8:133823311 | A | G | 1 | 0.00052 | <i>PHF20L1</i>  | missense variant                         | p.Val290Ile  |
| 8 | 133848818 | chr8:133848818 | T | C | 1 | 0.00052 | <i>PHF20L1</i>  | missense variant                         | p.Ser648Leu  |
| 8 | 133899098 | rs767101433    | T | C | 1 | 0.00052 | <i>TG</i>       | missense variant                         | p.Thr494Ile  |
| 8 | 134072345 | chr8:134072345 | T | C | 1 | 0.00053 | <i>SLA</i>      | missense variant & splice region variant | p.Gly61Arg   |
| 8 | 141810650 | chr8:141810650 | T | A | 1 | 0.00052 | <i>PTK2</i>     | missense variant                         | p.Leu378Gln  |
| 8 | 143927994 | chr8:143927994 | C | T | 1 | 0.00054 | <i>GML</i>      | missense variant                         | p.Met122Thr  |
| 9 | 5431907   | chr9:5431907   | A | G | 1 | 0.00052 | <i>PLGRKT</i>   | missense variant                         | p.Ala24Val   |
| 9 | 15474214  | rs766532453    | T | A | 1 | 0.00053 | <i>PSIP1</i>    | missense variant                         | p.Ser217Arg  |
| 9 | 20981639  | chr9:20981639  | T | C | 1 | 0.00052 | <i>FOCAD</i>    | missense variant                         | p.Ser1531Phe |
| 9 | 21077511  | rs761313571    | C | T | 1 | 0.00052 | <i>IFNB1</i>    | missense variant                         | p.Lys120Glu  |
| 9 | 21481264  | rs543760462    | G | C | 1 | 0.00052 | <i>IFNE</i>     | missense variant                         | p.Val144Leu  |
| 9 | 27289724  | chr9:27289724  | C | T | 1 | 0.00052 | <i>EQTN</i>     | missense variant                         | p.Asn143Asp  |
| 9 | 27562401  | chr9:27562401  | C | T | 1 | 0.00052 | <i>C9orf72</i>  | missense variant                         | p.His193Arg  |
| 9 | 32472997  | rs139726764    | A | G | 1 | 0.00053 | <i>DDX58</i>    | missense variant                         | p.Arg664Cys  |
| 9 | 32480284  | chr9:32480284  | C | G | 1 | 0.00052 | <i>DDX58</i>    | missense variant                         | p.Asp569Glu  |
| 9 | 32526076  | rs147964586    | A | G | 1 | 0.00052 | <i>DDX58</i>    | missense variant                         | p.Ala30Val   |
| 9 | 32630108  | chr9:32630108  | A | G | 1 | 0.00053 | <i>TAF1L</i>    | missense variant                         | p.His1824Tyr |
| 9 | 33038714  | chr9:33038714  | T | C | 1 | 0.00052 | <i>DNAJA1</i>   | missense variant                         | p.Pro336Leu  |
| 9 | 34724712  | chr9:34724712  | A | G | 1 | 0.00052 | <i>FAM205A</i>  | missense variant                         | p.Pro842Leu  |
| 9 | 35680970  | chr9:35680970  | T | C | 1 | 0.00052 | <i>CA9</i>      | missense variant                         | p.Thr443Ile  |
| 9 | 35680976  | chr9:35680976  | T | G | 1 | 0.00052 | <i>CA9</i>      | missense variant                         | p.Gly445Val  |
| 9 | 35684258  | chr9:35684258  | C | T | 1 | 0.00052 | <i>TPM2</i>     | missense variant                         | p.Ile253Val  |
| 9 | 35714056  | chr9:35714056  | G | A | 1 | 0.00052 | <i>TLN1</i>     | missense variant                         | p.Leu1048Ser |
| 9 | 35736056  | chr9:35736056  | G | A | 1 | 0.00052 | <i>CREB3</i>    | missense variant                         | p.Asp208Gly  |
| 9 | 35739077  | rs752951773    | A | G | 1 | 0.00052 | <i>GBA2</i>     | missense variant                         | p.Arg579Trp  |
| 9 | 35740046  | rs78197987     | T | G | 1 | 0.00052 | <i>GBA2</i>     | missense variant                         | p.Ala459Glu  |
| 9 | 35752131  | chr9:35752131  | T | G | 1 | 0.00052 | <i>RGP1</i>     | missense variant                         | p.Cys354Phe  |
| 9 | 37126730  | rs778387788    | G | A | 1 | 0.00052 | <i>ZCCHC7</i>   | missense variant                         | p.Lys134Arg  |
| 9 | 72741182  | chr9:72741182  | A | T | 1 | 0.00052 | <i>MAMDC2</i>   | missense variant                         | p.Tyr251Asn  |
| 9 | 72840697  | chr9:72840697  | C | T | 1 | 0.00054 | <i>MAMDC2</i>   | missense variant                         | p.Ile648Thr  |
| 9 | 72892266  | chr9:72892266  | T | G | 1 | 0.00054 | <i>SMCS</i>     | missense variant                         | p.Asp141Tyr  |
| 9 | 75775217  | rs746085433    | A | C | 1 | 0.00052 | <i>ANXA1</i>    | missense variant                         | p.His103Gln  |
| 9 | 86616625  | rs770552137    | T | C | 1 | 0.00052 | <i>RMI1</i>     | missense variant                         | p.Pro242Ser  |
| 9 | 86617677  | chr9:86617677  | T | G | 1 | 0.00053 | <i>RMI1</i>     | missense variant                         | p.Met592Ile  |
| 9 | 99278031  | chr9:99278031  | C | T | 1 | 0.00052 | <i>CDC14B</i>   | missense variant                         | p.Ile458Val  |
| 9 | 99413985  | chr9:99413985  | T | C | 1 | 0.00052 | <i>AAED1</i>    | missense variant                         | p.Val91Ile   |
| 9 | 100203947 | rs749923554    | C | A | 1 | 0.00053 | <i>TDRD7</i>    | missense variant                         | p.Leu215Phe  |
| 9 | 100672673 | chr9:100672673 | A | T | 1 | 0.00052 | <i>C9orf156</i> | missense variant                         | p.His212Leu  |
| 9 | 100692605 | rs748415690    | T | G | 1 | 0.00053 | <i>HEMGN</i>    | missense variant                         | p.Gln358Lys  |
| 9 | 101822201 | chr9:101822201 | A | C | 1 | 0.00052 | <i>COL15A1</i>  | missense variant                         | p.Pro1123Gln |
| 9 | 101894898 | rs776680716    | T | C | 1 | 0.00052 | <i>TGFBR1</i>   | missense variant                         | p.Arg155Cys  |
| 9 | 116760613 | rs534863329    | T | C | 1 | 0.00052 | <i>ZNF618</i>   | stop gained                              | p.Gln138*    |
| 9 | 123667366 | chr9:123667366 | T | A | 1 | 0.00054 | <i>TRAF1</i>    | missense variant                         | p.Ser395Thr  |

|    |           |                |   |   |   |         |                 |                                             |              |
|----|-----------|----------------|---|---|---|---------|-----------------|---------------------------------------------|--------------|
| 9  | 123937321 | chr9:123937321 | G | A | 1 | 0.00052 | <i>CNTRL</i>    | missense variant                            | p.Lys2258Arg |
| 9  | 130506928 | chr9:130506928 | C | A | 1 | 0.00056 | <i>SH2D3C</i>   | missense variant                            | p.Val572Gly  |
| 9  | 131469663 | rs754199667    | A | G | 1 | 0.00055 | <i>PKN3</i>     | missense variant                            | p.Val272Met  |
| 9  | 134501399 | rs779664732    | A | G | 1 | 0.00052 | <i>RAPGEF1</i>  | missense variant                            | p.Pro539Ser  |
| 9  | 135201814 | rs770527045    | T | C | 1 | 0.00052 | <i>SETX</i>     | missense variant                            | p.Ser1724Asn |
| 9  | 135275521 | chr9:135275521 | A | G | 1 | 0.00052 | <i>TTF1</i>     | missense variant                            | p.Leu498Phe  |
| 9  | 136227153 | chr9:136227153 | T | C | 1 | 0.00052 | <i>SURF2</i>    | missense variant                            | p.Thr177Ile  |
| 9  | 136270439 | chr9:136270439 | T | G | 1 | 0.00056 | <i>C9orf96</i>  | missense variant                            | p.Arg646Leu  |
| 9  | 139270848 | chr9:139270848 | G | C | 1 | 0.00058 | <i>SNAPC4</i>   | missense variant                            | p.Arg1457Pro |
| 9  | 139324834 | rs140543689    | T | C | 1 | 0.00055 | <i>INPP5E</i>   | missense variant                            | p.Gly566Asp  |
| 9  | 139350537 | chr9:139350537 | T | C | 1 | 0.00054 | <i>SEC16A</i>   | missense variant                            | p.Val1878Ile |
| 9  | 139371466 | chr9:139371466 | A | G | 1 | 0.00057 | <i>SEC16A</i>   | missense variant                            | p.Ser201Phe  |
| 10 | 6066275   | chr10:6066275  | C | T | 1 | 0.00052 | <i>IL2RA</i>    | missense variant                            | p.Glu100Gly  |
| 10 | 7601802   | chr10:7601802  | C | T | 1 | 0.00052 | <i>ITIH5</i>    | missense variant                            | p.His681Arg  |
| 10 | 7618845   | chr10:7618845  | C | T | 1 | 0.00053 | <i>ITIH5</i>    | missense variant                            | p.Lys517Glu  |
| 10 | 7759659   | rs369417932    | A | G | 1 | 0.00052 | <i>ITIH2</i>    | missense variant                            | p.Glu180Lys  |
| 10 | 7838115   | chr10:7838115  | A | G | 1 | 0.00058 | <i>ATP5C1</i>   | missense variant                            | p.Asp30Asn   |
| 10 | 11543198  | chr10:11543198 | A | G | 1 | 0.00052 | <i>USP6NL</i>   | stop gained                                 | p.Arg119*    |
| 10 | 14862121  | chr10:14862121 | G | T | 1 | 0.00052 | <i>CDNF</i>     | missense variant                            | p.Lys141Thr  |
| 10 | 14885423  | chr10:14885423 | A | G | 1 | 0.00055 | <i>HSPA14</i>   | missense variant                            | p.Cys92Tyr   |
| 10 | 14909263  | chr10:14909263 | C | T | 1 | 0.00052 | <i>HSPA14</i>   | missense variant                            | p.Ile392Thr  |
| 10 | 14976478  | chr10:14976478 | A | C | 1 | 0.00052 | <i>DCLRE1C</i>  | missense variant                            | p.Trp193Cys  |
| 10 | 16932418  | chr10:16932418 | A | G | 1 | 0.00052 | <i>CUBN</i>     | stop gained                                 | p.Gln2903*   |
| 10 | 17024493  | rs770647065    | A | G | 1 | 0.00052 | <i>CUBN</i>     | missense variant                            | p.Ser1562Phe |
| 10 | 17126274  | rs771444469    | G | A | 1 | 0.00052 | <i>CUBN</i>     | missense variant                            | p.Ile766Thr  |
| 10 | 17737161  | chr10:17737161 | T | G | 1 | 0.00052 | <i>STAM</i>     | missense variant                            | p.Ala217Ser  |
| 10 | 17756642  | chr10:17756642 | C | A | 1 | 0.00052 | <i>STAM</i>     | missense variant                            | p.Thr496Pro  |
| 10 | 26518653  | chr10:26518653 | G | A | 1 | 0.00052 | <i>GAD2</i>     | missense variant                            | p.Lys263Glu  |
| 10 | 26559597  | chr10:26559597 | G | C | 1 | 0.00052 | <i>GAD2</i>     | missense variant                            | p.Thr335Arg  |
| 10 | 27048038  | chr10:27048038 | C | G | 1 | 0.00053 | <i>ABI1</i>     | missense variant                            | p.Ser345Cys  |
| 10 | 28233155  | chr10:28233155 | C | T | 1 | 0.00052 | <i>ARMC4</i>    | missense variant                            | p.Lys580Arg  |
| 10 | 33190536  | rs775441007    | T | C | 1 | 0.00053 | <i>ITGB1</i>    | missense variant                            | p.Val787Ile  |
| 10 | 33552685  | chr10:33552685 | T | A | 1 | 0.00052 | <i>NRP1</i>     | missense variant                            | p.Ser183Thr  |
| 10 | 35333504  | chr10:35333504 | C | T | 1 | 0.00053 | <i>CUL2</i>     | missense variant                            | p.Tyr254Cys  |
| 10 | 49452876  | rs774906204    | G | A | 1 | 0.00052 | <i>FRMPD2</i>   | missense variant                            | p.Leu109Ser  |
| 10 | 50085162  | rs759570261    | T | A | 1 | 0.00052 | <i>WDFY4</i>    | missense variant                            | p.His2362Leu |
| 10 | 60121125  | chr10:60121125 | A | C | 1 | 0.00052 | <i>UBE2D1</i>   | missense variant                            | p.Pro18Thr   |
| 10 | 64159393  | rs781556841    | T | A | 1 | 0.00052 | <i>ZNF365</i>   | missense variant                            | p.Met357Leu  |
| 10 | 64159409  | chr10:64159409 | G | C | 1 | 0.00052 | <i>ZNF365</i>   | missense variant                            | p.Ala362Gly  |
| 10 | 69700756  | chr10:69700756 | C | T | 1 | 0.00054 | <i>HERC4</i>    | missense variant                            | p.Lys823Arg  |
| 10 | 69934296  | rs111965755    | T | C | 1 | 0.00052 | <i>MYPN</i>     | missense variant                            | p.Pro816Leu  |
| 10 | 70960036  | chr10:70960036 | C | G | 1 | 0.00052 | <i>SUPV3L1</i>  | missense variant &<br>splice region variant | p.Leu433Phe  |
| 10 | 72357879  | chr10:72357879 | A | G | 1 | 0.00054 | <i>PRF1</i>     | missense variant                            | p.Thr533Ile  |
| 10 | 73544777  | rs757570269    | A | G | 1 | 0.00056 | <i>CDH23</i>    | missense variant                            | p.Ala1883Thr |
| 10 | 73553011  | chr10:73553011 | G | A | 1 | 0.00052 | <i>CDH23</i>    | missense variant                            | p.Glu2114Gly |
| 10 | 73569716  | chr10:73569716 | A | C | 1 | 0.00055 | <i>CDH23</i>    | missense variant                            | p.Asp2959Glu |
| 10 | 73580074  | rs752687627    | C | T | 1 | 0.00052 | <i>PSAP</i>     | missense variant                            | p.Lys312Glu  |
| 10 | 75276999  | rs748602458    | A | G | 1 | 0.00052 | <i>USP54</i>    | missense variant                            | p.Ala1062Val |
| 10 | 75279564  | rs769615440    | C | T | 1 | 0.00053 | <i>USP54</i>    | missense variant                            | p.Gln890Arg  |
| 10 | 75289405  | chr10:75289405 | G | A | 1 | 0.00052 | <i>USP54</i>    | missense variant                            | p.Leu698Pro  |
| 10 | 75674612  | rs371319040    | C | T | 1 | 0.00052 | <i>PLAU</i>     | missense variant                            | p.Met303Thr  |
| 10 | 75860818  | chr10:75860818 | G | A | 1 | 0.00052 | <i>VCL</i>      | missense variant                            | p.Gln662Arg  |
| 10 | 82040072  | chr10:82040072 | A | C | 1 | 0.00056 | <i>MAT1A</i>    | splice region variant                       | p.Gly136Cys  |
| 10 | 87407007  | chr10:87407007 | T | G | 1 | 0.00052 | <i>GRID1</i>    | missense variant                            | p.Asn715Lys  |
| 10 | 90429671  | chr10:90429671 | G | A | 1 | 0.00052 | <i>LIPF</i>     | missense variant                            | p.His177Arg  |
| 10 | 90668464  | rs756949249    | G | T | 1 | 0.00052 | <i>STAMBPL1</i> | missense variant                            | p.Phe85Cys   |
| 10 | 90984962  | chr10:90984962 | A | G | 1 | 0.00052 | <i>LIPA</i>     | missense variant                            | p.Pro188Ser  |
| 10 | 91066763  | rs752866846    | A | T | 1 | 0.00052 | <i>IFIT2</i>    | stop gained                                 | p.Tyr350*    |
| 10 | 91098604  | chr10:91098604 | A | T | 1 | 0.00052 | <i>IFIT3</i>    | missense variant                            | p.Asp64Glu   |
| 10 | 91143404  | rs771089871    | A | G | 1 | 0.00052 | <i>IFIT1B</i>   | missense variant                            | p.Ala112Thr  |
| 10 | 91196039  | chr10:91196039 | A | C | 1 | 0.00052 | <i>SLC16A12</i> | missense variant                            | p.Ala356Ser  |
| 10 | 95380726  | rs762426409    | T | C | 1 | 0.00052 | <i>PDE6C</i>    | stop gained                                 | p.Arg238*    |
| 10 | 95418757  | chr10:95418757 | T | G | 1 | 0.00052 | <i>PDE6C</i>    | missense variant                            | p.Glu712Asp  |
| 10 | 95452470  | chr10:95452470 | T | C | 1 | 0.00052 | <i>FRA10AC1</i> | missense variant                            | p.Asp105Asn  |
| 10 | 97096366  | chr10:97096366 | C | G | 1 | 0.00054 | <i>SORBS1</i>   | missense variant                            | p.Ala1138Gly |
| 10 | 97101125  | chr10:97101125 | A | G | 1 | 0.00052 | <i>SORBS1</i>   | missense variant                            | p.Pro1123Ser |
| 10 | 97983740  | chr10:97983740 | A | G | 1 | 0.00052 | <i>BLNK</i>     | stop gained                                 | p.Arg123*    |

|    |           |                 |   |   |   |         |                 |                       |              |
|----|-----------|-----------------|---|---|---|---------|-----------------|-----------------------|--------------|
| 10 | 98079071  | rs762908031     | T | C | 1 | 0.00052 | <i>DNTT</i>     | missense variant      | p.Pro144Leu  |
| 10 | 98087323  | rs763298852     | C | G | 1 | 0.00052 | <i>DNTT</i>     | missense variant      | p.Asp325His  |
| 10 | 99211979  | chr10:99211979  | G | C | 1 | 0.00052 | <i>ZDHHC16</i>  | missense variant      | p.Leu126Val  |
| 10 | 99223635  | chr10:99223635  | C | G | 1 | 0.00052 | <i>MMS19</i>    | missense variant      | p.Ala631Gly  |
| 10 | 99350116  | rs773907690     | A | C | 1 | 0.00053 | <i>C10orf62</i> | missense variant      | p.His154Gln  |
| 10 | 100182224 | rs747984964     | A | G | 1 | 0.00054 | <i>HPS1</i>     | missense variant      | p.Arg549Cys  |
| 10 | 103868821 | rs773634189     | T | G | 1 | 0.00052 | <i>LDB1</i>     | missense variant      | p.Pro324Thr  |
| 10 | 103900485 | chr10:103900485 | A | T | 1 | 0.00053 | <i>PPRC1</i>    | missense variant      | p.Ser740Arg  |
| 10 | 104269039 | chr10:104269039 | G | A | 1 | 0.00052 | <i>SUFU</i>     | missense variant      | p.Tyr99Cys   |
| 10 | 104592290 | chr10:104592290 | C | G | 1 | 0.00055 | <i>CYP17A1</i>  | missense variant      | p.His373Asp  |
| 10 | 105762263 | rs776323344     | A | G | 1 | 0.00052 | <i>SLK</i>      | missense variant      | p.Asp443Asn  |
| 10 | 105763139 | rs372263493     | G | A | 1 | 0.00053 | <i>SLK</i>      | missense variant      | p.Ile735Val  |
| 10 | 105781469 | chr10:105781469 | G | A | 1 | 0.00053 | <i>SLK</i>      | missense variant      | p.Glu1180Gly |
| 10 | 105807547 | chr10:105807547 | C | A | 1 | 0.00052 | <i>COL17A1</i>  | missense variant      | p.Met762Arg  |
| 10 | 105830213 | chr10:105830213 | A | G | 1 | 0.00052 | <i>COL17A1</i>  | missense variant      | p.Thr193Ile  |
| 10 | 105920820 | rs759122938     | C | T | 1 | 0.00052 | <i>WDR96</i>    | missense variant      | p.Asn1172Ser |
| 10 | 105971871 | chr10:105971871 | A | G | 1 | 0.00052 | <i>WDR96</i>    | missense variant      | p.Thr210Met  |
| 10 | 106019354 | chr10:106019354 | G | A | 1 | 0.00052 | <i>GSTO1</i>    | missense variant      | p.Asn55Ser   |
| 10 | 115349477 | chr10:115349477 | T | C | 1 | 0.00054 | <i>NRAP</i>     | missense variant      | p.Arg1687Gln |
| 10 | 128785866 | chr10:128785866 | C | G | 1 | 0.00052 | <i>DOCK1</i>    | missense variant      | p.Trp103Cys  |
| 10 | 129172375 | chr10:129172375 | C | T | 1 | 0.00052 | <i>DOCK1</i>    | missense variant      | p.Phe1170Ser |
| 11 | 6415551   | chr11:6415551   | A | T | 1 | 0.00053 | <i>SMPD1</i>    | missense variant      | p.Leu537His  |
| 11 | 6423431   | rs775422772     | T | A | 1 | 0.00056 | <i>APBB1</i>    | missense variant      | p.Asp421Glu  |
| 11 | 6561164   | chr11:6561164   | A | G | 1 | 0.00054 | <i>DNHD1</i>    | missense variant      | p.Arg1160Gln |
| 11 | 12231089  | rs777287062     | T | C | 1 | 0.00052 | <i>MICAL2</i>   | missense variant      | p.Ser121Leu  |
| 11 | 12241757  | rs556662753     | A | G | 1 | 0.00052 | <i>MICAL2</i>   | missense variant      | p.Asp320Asn  |
| 11 | 12244252  | chr11:12244252  | C | T | 1 | 0.00052 | <i>MICAL2</i>   | missense variant      | p.Tyr471His  |
| 11 | 12278446  | rs199868277     | T | C | 1 | 0.00053 | <i>MICAL2</i>   | missense variant      | p.Arg1024Trp |
| 11 | 16774416  | chr11:16774416  | A | G | 1 | 0.00052 | <i>C11orf58</i> | missense variant      | p.Arg98Gln   |
| 11 | 17474719  | rs749771128     | T | C | 1 | 0.00052 | <i>ABCC8</i>    | missense variant      | p.Ala375Thr  |
| 11 | 17590736  | chr11:17590736  | A | G | 1 | 0.00052 | <i>OTOG</i>     | missense variant      | p.Val572Met  |
| 11 | 18050716  | rs772454328     | A | T | 1 | 0.00052 | <i>TPH1</i>     | missense variant      | p.Leu221Phe  |
| 11 | 18108433  | rs758017855     | C | T | 1 | 0.00052 | <i>SAAL1</i>    | missense variant      | p.Glu341Gly  |
| 11 | 18320479  | chr11:18320479  | C | A | 1 | 0.00052 | <i>HPS5</i>     | missense variant      | p.Cys342Gly  |
| 11 | 18357478  | chr11:18357478  | G | T | 1 | 0.00052 | <i>GTF2H1</i>   | missense variant      | p.Leu111Arg  |
| 11 | 18456337  | rs777146300     | T | C | 1 | 0.00052 | <i>LDHC</i>     | missense variant      | p.Arg157Cys  |
| 11 | 18579789  | chr11:18579789  | T | A | 1 | 0.00052 | <i>UEVLD</i>    | missense variant      | p.Val234Glu  |
| 11 | 18591767  | chr11:18591767  | T | C | 1 | 0.00052 | <i>UEVLD</i>    | stop gained           | p.Trp117*    |
| 11 | 18636215  | chr11:18636215  | C | T | 1 | 0.00052 | <i>SPTY2D1</i>  | missense variant      | p.Thr536Ala  |
| 11 | 18636536  | rs555192381     | T | C | 1 | 0.00057 | <i>SPTY2D1</i>  | missense variant      | p.Val429Ile  |
| 11 | 20950016  | rs757768975     | A | G | 1 | 0.00052 | <i>NELL1</i>    | missense variant      | p.Val358Ile  |
| 11 | 21592458  | rs754480107     | T | C | 1 | 0.00052 | <i>NELL1</i>    | missense variant      | p.Thr738Ile  |
| 11 | 35229669  | rs773638372     | G | A | 1 | 0.00052 | <i>CD44</i>     | missense variant      | p.Ser478Gly  |
| 11 | 46783596  | chr11:46783596  | A | G | 1 | 0.00052 | <i>CKAP5</i>    | missense variant      | p.Thr1392Met |
| 11 | 47296560  | chr11:47296560  | A | G | 1 | 0.00055 | <i>MADD</i>     | missense variant      | p.Arg170His  |
| 11 | 47304084  | chr11:47304084  | G | A | 1 | 0.00052 | <i>MADD</i>     | missense variant      | p.Lys541Arg  |
| 11 | 47307987  | chr11:47307987  | A | G | 1 | 0.00052 | <i>MADD</i>     | missense variant      | p.Ser852Asn  |
| 11 | 57427180  | rs374658636     | T | C | 1 | 0.00052 | <i>CLP1</i>     | missense variant      | p.Arg89Cys   |
| 11 | 57506695  | chr11:57506695  | G | A | 1 | 0.00052 | <i>TMX2</i>     | missense variant      | p.Asp236Gly  |
| 11 | 57513051  | chr11:57513051  | C | T | 1 | 0.00052 | <i>BTBD18</i>   | missense variant      | p.Arg232Gly  |
| 11 | 57518639  | chr11:57518639  | C | T | 1 | 0.00052 | <i>BTBD18</i>   | missense variant      | p.Lys8Glu    |
| 11 | 58377398  | chr11:58377398  | T | A | 1 | 0.00052 | <i>ZFP91</i>    | missense variant      | p.Arg156Trp  |
| 11 | 59344376  | rs761932791     | T | C | 1 | 0.00052 | <i>OSBP</i>     | missense variant      | p.Arg728His  |
| 11 | 59574239  | rs748789573     | C | T | 1 | 0.00053 | <i>MRPL16</i>   | missense variant      | p.Met113Val  |
| 11 | 59596976  | chr11:59596976  | T | G | 1 | 0.00052 | <i>GIF</i>      | missense variant      | p.Ala412Asp  |
| 11 | 59626719  | rs568414573     | G | A | 1 | 0.00052 | <i>TCN1</i>     | missense variant      | p.Leu193Pro  |
| 11 | 59633874  | rs750644060     | T | C | 1 | 0.00052 | <i>TCN1</i>     | missense variant      | p.Glu24Lys   |
| 11 | 60665372  | rs760498240     | C | T | 1 | 0.00052 | <i>PRPF19</i>   | missense variant      | p.Thr455Ala  |
| 11 | 61578485  | rs763381968     | A | C | 1 | 0.00052 | <i>FADS1</i>    | missense variant      | p.Trp249Cys  |
| 11 | 63953439  | chr11:63953439  | A | T | 1 | 0.00055 | <i>STIP1</i>    | missense variant      | p.Leu48Gln   |
| 11 | 64532977  | rs747776685     | T | C | 1 | 0.00059 | <i>SF1</i>      | missense variant      | p.Gly534Ser  |
| 11 | 64851195  | rs201897046     | T | C | 1 | 0.00054 | <i>CDCA5</i>    | splice region variant | p.Gly16Glu   |
| 11 | 65422408  | chr11:65422408  | G | A | 1 | 0.00055 | <i>RELA</i>     | missense variant      | p.Met366Thr  |
| 11 | 65486195  | chr11:65486195  | A | G | 1 | 0.00052 | <i>KAT5</i>     | missense variant      | p.Gly467Arg  |
| 11 | 65487283  | chr11:65487283  | C | G | 1 | 0.00053 | <i>RNASEH2C</i> | missense variant      | p.Ala234Gly  |
| 11 | 65487341  | chr11:65487341  | C | T | 1 | 0.00053 | <i>RNASEH2C</i> | missense variant      | p.Met215Val  |
| 11 | 66241449  | chr11:66241449  | C | T | 1 | 0.00056 | <i>PELI3</i>    | missense variant      | p.Leu298Pro  |

|    |           |                 |   |   |   |         |                     |                      |              |
|----|-----------|-----------------|---|---|---|---------|---------------------|----------------------|--------------|
| 11 | 66391439  | rs754368323     | A | G | 1 | 0.00052 | <i>RBM14</i>        | stop gained & splice |              |
| 11 | 66391793  | chr11:66391793  | G | A | 1 | 0.00054 | <i>RBM14</i>        | region variant       | p.Trp135*    |
| 11 | 66392401  | chr11:66392401  | T | G | 1 | 0.00056 | <i>RBM14</i>        | missense variant     | p.Lys149Arg  |
| 11 | 66407523  | chr11:66407523  | T | C | 1 | 0.00052 | <i>RBM4</i>         | missense variant     | p.Ala352Ser  |
| 11 | 66453550  | chr11:66453550  | C | A | 1 | 0.00055 | <i>SPTBN2</i>       | missense variant     | p.Ala114Val  |
| 11 | 67068445  | chr11:67068445  | A | G | 1 | 0.00057 | <i>ANKRD13D</i>     | missense variant     | p.Val2322Gly |
| 11 | 67164829  | chr11:67164829  | T | C | 1 | 0.00057 | <i>RAD9A</i>        | missense variant     | p.Cys3Tyr    |
| 11 | 68575043  | chr11:68575043  | A | C | 1 | 0.00055 | <i>CPT1A</i>        | missense variant     | p.Thr351Ile  |
| 11 | 68575044  | chr11:68575044  | A | C | 1 | 0.00055 | <i>CPT1A</i>        | missense variant     | p.Trp115Cys  |
| 11 | 68660415  | chr11:68660415  | T | A | 1 | 0.00052 | <i>MRPL21</i>       | missense variant     | p.Trp115Leu  |
| 11 | 68665473  | rs773363270     | T | G | 1 | 0.00052 | <i>MRPL21</i>       | missense variant     | p.Ser166Thr  |
| 11 | 70009495  | rs374970212     | A | G | 1 | 0.00052 | <i>ANO1</i>         | missense variant     | p.Pro52Thr   |
| 11 | 71628685  | chr11:71628685  | A | C | 1 | 0.00052 | <i>RP11-849H4.2</i> | missense variant     | p.Asp609Asn  |
| 11 | 71701716  | rs773012443     | T | C | 1 | 0.00052 | <i>RNF121</i>       | missense variant     | p.Val140Phe  |
| 11 | 71726456  | rs752799135     | C | T | 1 | 0.00056 | <i>NUMA1</i>        | missense variant     | p.Arg194Trp  |
| 11 | 76954889  | chr11:76954889  | C | A | 1 | 0.00052 | <i>GDPD4</i>        | missense variant     | p.Asp698Gly  |
| 11 | 77910694  | chr11:77910694  | C | T | 1 | 0.00052 | <i>USP35</i>        | missense variant     | p.Phe364Cys  |
| 11 | 77924720  | chr11:77924720  | A | C | 1 | 0.00053 | <i>USP35</i>        | missense variant     | p.Ile287Thr  |
| 11 | 77924795  | chr11:77924795  | A | G | 1 | 0.00053 | <i>USP35</i>        | missense variant     | p.Ala973Glu  |
| 11 | 77937852  | chr11:77937852  | C | T | 1 | 0.00053 | <i>GAB2</i>         | missense variant     | p.Gly998Asp  |
| 11 | 87020553  | chr11:87020553  | G | A | 1 | 0.00052 | <i>TMEM135</i>      | missense variant     | p.Asn289Ser  |
| 11 | 89106654  | rs528433051     | C | T | 1 | 0.00052 | <i>NOX4</i>         | missense variant     | p.Ile259Val  |
| 11 | 102201801 | chr11:102201801 | A | G | 1 | 0.00052 | <i>BIRC3</i>        | missense variant     | p.Thr382Ala  |
| 11 | 102564734 | rs376387145     | C | T | 1 | 0.00052 | <i>MMP27</i>        | missense variant     | p.Ala385Thr  |
| 11 | 102665941 | rs186925812     | A | G | 1 | 0.00052 | <i>MMP1</i>         | missense variant     | p.Thr366Ala  |
| 11 | 102824909 | rs773554450     | T | C | 1 | 0.00053 | <i>MMP13</i>        | missense variant     | p.Thr288Ile  |
| 11 | 108043929 | rs192893789     | C | A | 1 | 0.00052 | <i>NPAT</i>         | missense variant     | p.Glu205Lys  |
| 11 | 108121544 | rs554805703     | A | G | 1 | 0.00052 | <i>ATM</i>          | missense variant     | p.Asn594Lys  |
| 11 | 108158421 | chr11:108158421 | G | C | 1 | 0.00054 | <i>ATM</i>          | missense variant     | p.Arg451His  |
| 11 | 108235896 | rs786203721     | A | C | 1 | 0.00052 | <i>ATM</i>          | missense variant     | p.Thr1363Ser |
| 11 | 111896967 | chr11:111896967 | C | G | 1 | 0.00052 | <i>DLAT</i>         | missense variant     | p.Leu2980Ile |
| 11 | 111943820 | chr11:111943820 | A | G | 1 | 0.00052 | <i>PIH1D2</i>       | missense variant     | p.Ala109Pro  |
| 11 | 111953260 | rs779558030     | A | G | 1 | 0.00053 | <i>C11orf57</i>     | missense variant     | p.Pro27Ser   |
| 11 | 112072779 | rs181898566     | A | G | 1 | 0.00052 | <i>BCO2</i>         | missense variant     | p.Arg149His  |
| 11 | 116729339 | rs767005637     | A | G | 1 | 0.00052 | <i>SIK3</i>         | missense variant     | p.Val354Ile  |
| 11 | 117969714 | rs149423953     | A | C | 1 | 0.00052 | <i>TMPRSS4</i>      | missense variant     | p.Arg941Trp  |
| 11 | 118128020 | chr11:118128020 | C | T | 1 | 0.00052 | <i>MPZL2</i>        | missense variant     | p.Arg20Ser   |
| 11 | 118521223 | rs781909091     | T | G | 1 | 0.00052 | <i>PHLDB1</i>       | missense variant     | p.Glu198Gly  |
| 11 | 118850225 | rs369297325     | G | C | 1 | 0.00054 | <i>FOXR1</i>        | missense variant     | p.Arg1282Leu |
| 11 | 119029055 | chr11:119029055 | A | G | 1 | 0.00052 | <i>ABCG4</i>        | missense variant     | p.Ala153Gly  |
| 11 | 119029587 | chr11:119029587 | G | A | 1 | 0.00052 | <i>ABCG4</i>        | missense variant     | p.Ala72Thr   |
| 11 | 119045226 | rs199476043     | A | G | 1 | 0.00053 | <i>NLRX1</i>        | missense variant     | p.Tyr462Cys  |
| 11 | 119050411 | rs777542825     | T | C | 1 | 0.00053 | <i>NLRX1</i>        | stop gained          | p.Arg305His  |
| 11 | 119050440 | rs746329727     | A | C | 1 | 0.00053 | <i>NLRX1</i>        | missense variant     | p.Arg561*    |
| 11 | 119061541 | chr11:119061541 | A | G | 1 | 0.00056 | <i>CCDC153</i>      | stop gained          | p.Ser570Arg  |
| 11 | 120198193 | rs768909818     | C | G | 1 | 0.00052 | <i>TMEM136</i>      | missense variant     | p.Gln120*    |
| 11 | 134022867 | rs147905924     | T | C | 1 | 0.00052 | <i>NCAPD3</i>       | missense variant     | p.Gly37Arg   |
| 11 | 134074047 | chr11:134074047 | C | T | 1 | 0.00052 | <i>NCAPD3</i>       | missense variant     | p.Arg1490Gln |
| 11 | 134119074 | chr11:134119074 | C | G | 1 | 0.00052 | <i>THYN1</i>        | missense variant     | p.Tyr370Cys  |
| 12 | 6132847   | rs756064548     | T | A | 1 | 0.00054 | <i>VWF</i>          | missense variant     | p.Pro156Arg  |
| 12 | 6153527   | rs61748477      | A | G | 1 | 0.00054 | <i>VWF</i>          | missense variant     | p.Val1110Glu |
| 12 | 6637443   | chr12:6637443   | G | C | 1 | 0.00054 | <i>NCAPD2</i>       | missense variant     | p.Thr791Met  |
| 12 | 6923965   | chr12:6923965   | G | C | 1 | 0.00053 | <i>CD4</i>          | missense variant     | p.Ala1083Gly |
| 12 | 6924149   | rs140406047     | A | G | 1 | 0.00053 | <i>CD4</i>          | missense variant     | p.Ser138Arg  |
| 12 | 6940426   | chr12:6940426   | T | C | 1 | 0.00053 | <i>LEPREL2</i>      | missense variant     | p.Val200Met  |
| 12 | 6970139   | chr12:6970139   | G | A | 1 | 0.00052 | <i>USP5</i>         | missense variant     | p.Ser344Phe  |
| 12 | 7077710   | rs782451030     | T | G | 1 | 0.00052 | <i>PHB2</i>         | stop gained          | p.Asn456Ser  |
| 12 | 7173211   | rs781960849     | G | A | 1 | 0.00052 | <i>C1S</i>          | missense variant     | p.Cys108*    |
| 12 | 7310658   | rs79149590      | A | C | 1 | 0.00055 | <i>CLSTN3</i>       | missense variant     | p.Ile270Val  |
| 12 | 7894070   | chr12:7894070   | C | T | 1 | 0.00052 | <i>CLEC4C</i>       | missense variant     | p.Thr963Asn  |
| 12 | 8196590   | chr12:8196590   | C | G | 1 | 0.00052 | <i>FOXJ2</i>        | missense variant     | p.Tyr61Cys   |
| 12 | 8211697   | rs370515640     | T | C | 1 | 0.00052 | <i>C3AR1</i>        | missense variant     | p.Arg174Pro  |
| 12 | 8759510   | rs759799595     | T | C | 1 | 0.00052 | <i>AICDA</i>        | missense variant     | p.Arg362Gln  |
| 12 | 9086467   | rs773756154     | T | C | 1 | 0.00052 | <i>PHC1</i>         | missense variant     | p.Arg36His   |
| 12 | 9220787   | rs770612196     | T | C | 1 | 0.00052 | <i>A2M</i>          | missense variant     | p.Pro634Ser  |
| 12 | 14769643  | chr12:14769643  | T | C | 1 | 0.00052 | <i>GUCY2C</i>       | missense variant     | p.Cys1467Tyr |
| 12 | 14849366  | chr12:14849366  | C | A | 1 | 0.00052 | <i>GUCY2C</i>       | missense variant     | p.Ser965Asn  |
| 12 | 15654593  | chr12:15654593  | T | A | 1 | 0.00052 | <i>PTPRO</i>        | missense variant     | p.Leu6Trp    |
|    |           |                 |   |   | 1 |         |                     |                      | p.Asn234Ile  |

|    |           |                 |   |   |   |         |          |                                             |              |
|----|-----------|-----------------|---|---|---|---------|----------|---------------------------------------------|--------------|
| 12 | 25274804  | chr12:25274804  | T | G | 1 | 0.00052 | CASC1    | missense variant                            | p.Phe374Leu  |
| 12 | 25380180  | chr12:25380180  | G | A | 1 | 0.00052 | KRAS     | missense variant                            | p.Ile93Thr   |
| 12 | 31231344  | chr12:31231344  | C | A | 1 | 0.00052 | DDX11    | missense variant                            | p.Gln6Pro    |
| 12 | 31236916  | chr12:31236916  | T | C | 1 | 0.00052 | DDX11    | stop gained                                 | p.Arg54*     |
| 12 | 32480528  | rs201857634     | T | G | 1 | 0.00056 | BICD1    | missense variant                            | p.Gly380Val  |
| 12 | 32955405  | chr12:32955405  | T | C | 1 | 0.00052 | PKP2     | missense variant                            | p.Ser744Asn  |
| 12 | 34179426  | chr12:34179426  | T | C | 1 | 0.00052 | ALG10    | missense variant                            | p.Ser333Phe  |
| 12 | 39688290  | rs373406994     | A | C | 1 | 0.00057 | KIF21A   | missense variant                            | p.Arg1655Leu |
| 12 | 39760184  | rs765082569     | T | C | 1 | 0.00052 | KIF21A   | missense variant                            | p.Ala291Thr  |
| 12 | 40694669  | chr12:40694669  | C | G | 1 | 0.00052 | LRRK2    | missense variant                            | p.Gly198Ala  |
| 12 | 40702974  | rs201013695     | G | A | 1 | 0.00052 | LRRK2    | missense variant                            | p.Tyr1419Cys |
| 12 | 40713824  | rs759685441     | T | A | 1 | 0.00054 | LRRK2    | missense variant                            | p.His1621Leu |
| 12 | 40713825  | rs765275134     | A | C | 1 | 0.00053 | LRRK2    | missense variant                            | p.His1621Gln |
| 12 | 44176243  | chr12:44176243  | T | G | 1 | 0.00052 | IRAK4    | missense variant                            | p.Ala359Ser  |
| 12 | 44196238  | chr12:44196238  | A | G | 1 | 0.00054 | TWF1     | missense variant                            | p.Pro79Ser   |
| 12 | 48177940  | chr12:48177940  | G | A | 1 | 0.00057 | HDAC7    | missense variant                            | p.Cys1004Arg |
| 12 | 48457588  | chr12:48457588  | T | C | 1 | 0.00052 | SENP1    | missense variant                            | p.Gly438Arg  |
| 12 | 48468218  | chr12:48468218  | T | G | 1 | 0.00052 | SENP1    | missense variant                            | p.Pro277Thr  |
| 12 | 49298213  | chr12:49298213  | A | G | 1 | 0.00052 | CCDC65   | missense variant                            | p.Ala32Thr   |
| 12 | 49315945  | chr12:49315945  | C | A | 1 | 0.00052 | FKBP11   | missense variant                            | p.Leu143Arg  |
| 12 | 49390628  | rs531994480     | T | G | 1 | 0.00052 | DDN      | missense variant                            | p.Ser677Arg  |
| 12 | 49421922  | chr12:49421922  | T | G | 1 | 0.00055 | KMT2D    | missense variant &<br>splice region variant | p.Asn4795Lys |
| 12 | 49426595  | chr12:49426595  | A | G | 1 | 0.00052 | KMT2D    | stop gained                                 | p.Gln3965*   |
| 12 | 49426837  | chr12:49426837  | T | C | 1 | 0.00056 | KMT2D    | missense variant                            | p.Ser3884Asn |
| 12 | 49428064  | chr12:49428064  | C | T | 1 | 0.00053 | KMT2D    | missense variant                            | p.Gln3509Arg |
| 12 | 49432575  | chr12:49432575  | A | G | 1 | 0.00055 | KMT2D    | missense variant                            | p.Ala2855Val |
| 12 | 49447042  | chr12:49447042  | T | A | 1 | 0.00052 | KMT2D    | missense variant                            | p.Phe301Tyr  |
| 12 | 51092172  | chr12:51092172  | C | T | 1 | 0.00052 | DIP2B    | missense variant                            | p.Tyr704His  |
| 12 | 51102337  | rs746963040     | A | G | 1 | 0.00052 | DIP2B    | missense variant                            | p.Val881Met  |
| 12 | 51203313  | chr12:51203313  | T | C | 1 | 0.00052 | ATF1     | missense variant                            | p.Ala90Val   |
| 12 | 52284856  | chr12:52284856  | T | C | 1 | 0.00054 | ANKRD33  | missense variant                            | p.Pro376Ser  |
| 12 | 53647053  | rs750845106     | C | T | 1 | 0.00052 | MFSO5    | missense variant                            | p.Phe252Ser  |
| 12 | 53668773  | chr12:53668773  | A | G | 1 | 0.00053 | ESPL1    | missense variant                            | p.Gly560Glu  |
| 12 | 53680248  | chr12:53680248  | A | T | 1 | 0.00054 | ESPL1    | missense variant                            | p.Leu1243Gln |
| 12 | 53701436  | rs767509596     | T | C | 1 | 0.00055 | AAAS     | missense variant                            | p.Arg493His  |
| 12 | 54920358  | rs779095429     | A | G | 1 | 0.00052 | NCKAP1L  | missense variant                            | p.Val735Ile  |
| 12 | 54926017  | chr12:54926017  | G | C | 1 | 0.00052 | NCKAP1L  | missense variant                            | p.Pro949Ala  |
| 12 | 54966942  | rs137936270     | T | C | 1 | 0.00052 | PDE1B    | missense variant                            | p.Ser249Leu  |
| 12 | 56296101  | chr12:56296101  | A | G | 1 | 0.00056 | WIBG     | missense variant                            | p.Pro57Leu   |
| 12 | 56351432  | chr12:56351432  | G | C | 1 | 0.00053 | PMEL     | missense variant                            | p.Val219Leu  |
| 12 | 56363280  | chr12:56363280  | A | G | 1 | 0.00052 | CDK2     | missense variant                            | p.Ala170Thr  |
| 12 | 56397574  | chr12:56397574  | G | A | 1 | 0.00052 | SUOX     | missense variant                            | p.Glu134Gly  |
| 12 | 56491576  | chr12:56491576  | C | A | 1 | 0.00052 | ERBB3    | missense variant                            | p.Tyr823Ser  |
| 12 | 56527902  | rs771895295     | T | G | 1 | 0.00052 | ESYT1    | missense variant                            | p.Lys504Asn  |
| 12 | 56743969  | rs774874986     | T | C | 1 | 0.00052 | STAT2    | missense variant                            | p.Arg374Gln  |
| 12 | 57397455  | rs377628250     | A | G | 1 | 0.00052 | ZBTB39   | missense variant                            | p.Thr416Ile  |
| 12 | 57605078  | chr12:57605078  | A | C | 1 | 0.00056 | LRP1     | missense variant                            | p.Arg4346Ser |
| 12 | 57843223  | chr12:57843223  | A | T | 1 | 0.00052 | INHBC    | missense variant                            | p.Asn159Lys  |
| 12 | 57843425  | chr12:57843425  | A | G | 1 | 0.00055 | INHBC    | missense variant                            | p.Val227Ile  |
| 12 | 57922958  | chr12:57922958  | T | C | 1 | 0.00053 | MBD6     | missense variant                            | p.Pro985Ser  |
| 12 | 58020616  | chr12:58020616  | A | G | 1 | 0.00053 | B4GALNT1 | missense variant &<br>missense variant      | p.Arg505Cys  |
| 12 | 58180073  | chr12:58180073  | C | A | 1 | 0.00052 | TSFM     | splice region variant                       | p.Glu120Ala  |
| 12 | 66547210  | rs767684716     | C | T | 1 | 0.00053 | TMBIM4   | missense variant &<br>missense variant      | p.Tyr39Cys   |
| 12 | 68708729  | chr12:68708729  | T | C | 1 | 0.00052 | MDM1     | splice region variant                       | p.Gly500Arg  |
| 12 | 72771892  | rs752459412     | T | C | 1 | 0.00055 | TRHDE    | missense variant                            | p.Pro391Ser  |
| 12 | 96360155  | rs79312289      | G | C | 1 | 0.00052 | AMDHD1   | missense variant                            | p.Asn354Lys  |
| 12 | 99192750  | chr12:99192750  | T | C | 1 | 0.00052 | ANKS1B   | missense variant &<br>missense variant      | p.Gly1077Arg |
| 12 | 103249110 | rs199475652     | C | A | 1 | 0.00052 | PAH      | splice region variant                       | p.His170Gln  |
| 12 | 104046434 | chr12:104046434 | C | T | 1 | 0.00052 | STAB2    | missense variant                            | p.Met453Thr  |
| 12 | 104048432 | chr12:104048432 | G | A | 1 | 0.00052 | STAB2    | missense variant                            | p.Arg503Gly  |
| 12 | 104078854 | rs138445835     | A | G | 1 | 0.00052 | STAB2    | missense variant                            | p.Ala997Thr  |
| 12 | 104111602 | chr12:104111602 | T | A | 1 | 0.00052 | STAB2    | missense variant                            | p.Ile1556Phe |
| 12 | 108961086 | chr12:108961086 | T | C | 1 | 0.00052 | ISCU     | stop gained                                 | p.Gln154*    |
| 12 | 109041247 | chr12:109041247 | T | C | 1 | 0.00052 | CORO1C   | missense variant                            | p.Asp506Asn  |
| 12 | 109541397 | chr12:109541397 | C | A | 1 | 0.00052 | UNG      | missense variant                            | p.Lys261Thr  |

|    |           |                 |   |   |   |         |                  |                                          |              |
|----|-----------|-----------------|---|---|---|---------|------------------|------------------------------------------|--------------|
| 12 | 109945540 | rs774203713     | T | C | 1 | 0.00052 | <i>UBE3B</i>     | missense variant & splice region variant | p.Thr541Ile  |
| 12 | 109949059 | rs376213401     | A | G | 1 | 0.00052 | <i>UBE3B</i>     | missense variant                         | p.Arg636Gln  |
| 12 | 109972537 | rs370843966     | A | G | 1 | 0.00057 | <i>UBE3B</i>     | missense variant                         | p.Glu1053Lys |
| 12 | 111948294 | chr12:111948294 | C | G | 1 | 0.00052 | <i>ATXN2</i>     | missense variant                         | p.Gln711Glu  |
| 12 | 111956136 | rs755386197     | A | G | 1 | 0.00052 | <i>ATXN2</i>     | missense variant                         | p.Ser521Leu  |
| 12 | 111956139 | chr12:111956139 | T | C | 1 | 0.00052 | <i>ATXN2</i>     | missense variant                         | p.Gly520Glu  |
| 12 | 112280935 | chr12:112280935 | G | A | 1 | 0.00052 | <i>MAPKAPK5</i>  | missense variant                         | p.Tyr22Cys   |
| 12 | 112485570 | chr12:112485570 | C | T | 1 | 0.00052 | <i>NAA25</i>     | missense variant                         | p.Ile635Met  |
| 12 | 122332723 | rs552043284     | T | C | 1 | 0.00052 | <i>PSMD9</i>     | missense variant                         | p.Arg73Cys   |
| 12 | 123238315 | rs780142224     | G | T | 1 | 0.00052 | <i>DENR</i>      | missense variant                         | p.Leu23Val   |
| 12 | 123434428 | chr12:123434428 | C | G | 1 | 0.00054 | <i>ABCB9</i>     | missense variant                         | p.Leu252Val  |
| 12 | 123813442 | rs757344135     | G | A | 1 | 0.00052 | <i>SBNO1</i>     | missense variant & splice region variant | p.Phe379Leu  |
| 12 | 129189764 | rs777057937     | T | C | 1 | 0.00058 | <i>TMEM132C</i>  | missense variant                         | p.Arg751Cys  |
| 12 | 129299323 | chr12:129299323 | C | T | 1 | 0.00052 | <i>SLC15A4</i>   | missense variant                         | p.Asn280Ser  |
| 13 | 21370341  | chr13:21370341  | C | T | 1 | 0.00052 | <i>XPO4</i>      | missense variant                         | p.Lys891Glu  |
| 13 | 24330756  | chr13:24330756  | G | C | 1 | 0.00056 | <i>MIPEP</i>     | missense variant & splice region variant | p.Ala658Pro  |
| 13 | 25672042  | chr13:25672042  | C | A | 1 | 0.00053 | <i>PABPC3</i>    | missense variant                         | p.His569Pro  |
| 13 | 28626774  | chr13:28626774  | G | T | 1 | 0.00052 | <i>FLT3</i>      | missense variant                         | p.Arg174Ser  |
| 13 | 28877500  | rs763158497     | T | C | 1 | 0.00057 | <i>FLT1</i>      | missense variant                         | p.Arg1274Lys |
| 13 | 28895671  | rs754303774     | T | C | 1 | 0.00052 | <i>FLT1</i>      | missense variant                         | p.Val1035Met |
| 13 | 31231679  | chr13:31231679  | T | G | 1 | 0.00052 | <i>USPL1</i>     | missense variant                         | p.Ala489Ser  |
| 13 | 31231818  | chr13:31231818  | G | C | 1 | 0.00053 | <i>USPL1</i>     | missense variant                         | p.Ser535Cys  |
| 13 | 37427768  | rs757281925     | T | C | 1 | 0.00053 | <i>SMAD9</i>     | missense variant                         | p.Val350Met  |
| 13 | 41134585  | chr13:41134585  | G | T | 1 | 0.00052 | <i>FOXO1</i>     | missense variant                         | p.Tyr348Ser  |
| 13 | 41517106  | chr13:41517106  | T | G | 1 | 0.00052 | <i>ELF1</i>      | missense variant                         | p.Thr263Asn  |
| 13 | 41524074  | rs753000405     | G | C | 1 | 0.00052 | <i>ELF1</i>      | missense variant                         | p.Val133Leu  |
| 13 | 41646921  | chr13:41646921  | A | G | 1 | 0.00052 | <i>WBP4</i>      | missense variant                         | p.Ala164Thr  |
| 13 | 48830338  | chr13:48830338  | C | T | 1 | 0.00052 | <i>ITM2B</i>     | missense variant                         | p.Ile91Thr   |
| 13 | 49086968  | rs746852001     | C | T | 1 | 0.00052 | <i>RCBTB2</i>    | missense variant                         | p.His143Arg  |
| 13 | 50092236  | chr13:50092236  | T | C | 1 | 0.00052 | <i>PHF11</i>     | missense variant                         | p.Ala136Val  |
| 13 | 76164099  | chr13:76164099  | T | C | 1 | 0.00052 | <i>UCHL3</i>     | missense variant                         | p.Pro101Leu  |
| 13 | 76164252  | chr13:76164252  | A | G | 1 | 0.00052 | <i>UCHL3</i>     | missense variant                         | p.Gly152Asp  |
| 13 | 76335124  | chr13:76335124  | C | G | 1 | 0.00053 | <i>LMO7</i>      | missense variant                         | p.Gln141His  |
| 13 | 76397972  | chr13:76397972  | C | G | 1 | 0.00052 | <i>LMO7</i>      | missense variant                         | p.Gly1023Ala |
| 13 | 76407260  | rs755067327     | G | A | 1 | 0.00052 | <i>LMO7</i>      | missense variant                         | p.Lys1060Arg |
| 13 | 113512550 | chr13:113512550 | G | C | 1 | 0.00052 | <i>ATP11A</i>    | missense variant                         | p.His871Gln  |
| 13 | 113556677 | rs542171405     | C | T | 1 | 0.00052 | <i>MCF2L</i>     | missense variant                         | p.Met54Thr   |
| 13 | 114472131 | chr13:114472131 | G | A | 1 | 0.00052 | <i>TMEM255B</i>  | missense variant & splice region variant | p.Met84Val   |
| 14 | 20876416  | chr14:20876416  | T | C | 1 | 0.00052 | <i>TEP1</i>      | missense variant                         | p.Met61Ile   |
| 14 | 20897481  | chr14:20897481  | T | A | 1 | 0.00054 | <i>KLHL33</i>    | missense variant                         | p.Cys377Ser  |
| 14 | 21487849  | rs372825917     | A | G | 1 | 0.00052 | <i>NDRG2</i>     | missense variant                         | p.Thr222Ile  |
| 14 | 21511164  | chr14:21511164  | G | A | 1 | 0.00055 | <i>RNASE7</i>    | missense variant                         | p.Arg5Gly    |
| 14 | 21511524  | chr14:21511524  | T | C | 1 | 0.00052 | <i>RNASE7</i>    | stop gained                              | p.Arg125*    |
| 14 | 21992478  | rs370096247     | T | C | 1 | 0.00052 | <i>SALL2</i>     | missense variant                         | p.Glu462Lys  |
| 14 | 22111727  | chr14:22111727  | G | C | 1 | 0.00052 | <i>TRAV1-2</i>   | missense variant                         | p.Arg83Gly   |
| 14 | 22280017  | chr14:22280017  | G | C | 1 | 0.00052 | <i>TRAV9-1</i>   | missense variant                         | p.Ala69Gly   |
| 14 | 22466287  | chr14:22466287  | C | G | 1 | 0.00052 | <i>TRAV17</i>    | missense variant                         | p.Glu73Gln   |
| 14 | 23237365  | chr14:23237365  | A | G | 1 | 0.00052 | <i>OXA1L</i>     | missense variant                         | p.Gly202Arg  |
| 14 | 23445709  | chr14:23445709  | T | C | 1 | 0.00052 | <i>AJUBA</i>     | missense variant                         | p.Ala399Thr  |
| 14 | 23566904  | chr14:23566904  | A | T | 1 | 0.00052 | <i>C14orf119</i> | missense variant                         | p.Phe13Ile   |
| 14 | 23745607  | rs73602454      | A | G | 1 | 0.00052 | <i>HOMEZ</i>     | missense variant                         | p.Ser279Leu  |
| 14 | 23856759  | chr14:23856759  | G | C | 1 | 0.00054 | <i>MYH6</i>      | missense variant                         | p.Gln1543His |
| 14 | 23894984  | chr14:23894984  | G | T | 1 | 0.00052 | <i>MYH7</i>      | missense variant                         | p.Ile736Leu  |
| 14 | 24571998  | rs766166255     | G | T | 1 | 0.00053 | <i>PCK2</i>      | missense variant                         | p.Phe424Cys  |
| 14 | 24588364  | rs373798935     | T | C | 1 | 0.00052 | <i>DCAF11</i>    | missense variant                         | p.Arg264Cys  |
| 14 | 24739230  | chr14:24739230  | T | C | 1 | 0.00056 | <i>RABGGTA</i>   | missense variant                         | p.Arg119His  |
| 14 | 24798400  | rs752368778     | G | A | 1 | 0.00055 | <i>ADCY4</i>     | missense variant                         | p.Leu464Pro  |
| 14 | 24883816  | chr14:24883816  | C | T | 1 | 0.00052 | <i>NYNRIN</i>    | missense variant                         | p.Ile954Thr  |
| 14 | 50307541  | chr14:50307541  | G | A | 1 | 0.00052 | <i>NEMF</i>      | missense variant                         | p.Ile134Thr  |
| 14 | 50318558  | chr14:50318558  | C | A | 1 | 0.00052 | <i>NEMF</i>      | missense variant                         | p.Val32Gly   |
| 14 | 55510109  | rs771813922     | T | C | 1 | 0.00052 | <i>SOCS4</i>     | missense variant                         | p.Pro117Leu  |
| 14 | 62187288  | chr14:62187288  | T | C | 1 | 0.00052 | <i>HIF1A</i>     | missense variant & splice region variant | p.Ala99Val   |
| 14 | 64681089  | rs755527635     | A | G | 1 | 0.00056 | <i>SYNE2</i>     | missense variant                         | p.Val6412Met |
| 14 | 64683131  | chr14:64683131  | T | C | 1 | 0.00052 | <i>SYNE2</i>     | missense variant                         | p.Thr6442Ile |



|    |           |                 |   |   |   |         |                      |                                             |              |
|----|-----------|-----------------|---|---|---|---------|----------------------|---------------------------------------------|--------------|
| 14 | 65527962  | rs369004788     | G | C | 1 | 0.00052 | <i>FNTB</i>          | missense variant                            | p.Leu450Val  |
| 14 | 65550920  | rs781393600     | C | T | 1 | 0.00052 | <i>MAX</i>           | missense variant                            | p.Lys90Arg   |
| 14 | 67850069  | chr14:67850069  | G | C | 1 | 0.00052 | <i>EIF2S1</i>        | missense variant                            | p.Ala287Gly  |
| 14 | 70245141  | chr14:70245141  | C | G | 1 | 0.00052 | <i>SLC10A1</i>       | missense variant                            | p.Phe284Leu  |
| 14 | 73980809  | chr14:73980809  | T | A | 1 | 0.00052 | <i>HEATR4</i>        | missense variant                            | p.Leu447Gln  |
| 14 | 73989345  | chr14:73989345  | C | T | 1 | 0.00053 | <i>HEATR4</i>        | missense variant                            | p.His171Arg  |
| 14 | 77705068  | chr14:77705068  | G | C | 1 | 0.00052 | <i>TMEM63C</i>       | missense variant                            | p.Pro228Arg  |
| 14 | 94754645  | rs779524045     | G | A | 1 | 0.00052 | <i>SERPINA10</i>     | missense variant                            | p.Trp364Arg  |
| 14 | 94756648  | rs774696183     | T | C | 1 | 0.00057 | <i>SERPINA10</i>     | missense variant                            | p.Asp135Asn  |
| 14 | 99865078  | chr14:99865078  | G | T | 1 | 0.00054 | <i>SETD3</i>         | missense variant                            | p.Lys575Gln  |
| 14 | 101349424 | chr14:101349424 | A | G | 1 | 0.00053 | <i>RTL1</i>          | missense variant                            | p.Pro568Ser  |
| 14 | 102793048 | chr14:102793048 | A | G | 1 | 0.00052 | <i>ZNF839</i>        | missense variant                            | p.Gly339Ser  |
| 14 | 102808331 | chr14:102808331 | A | G | 1 | 0.00054 | <i>ZNF839</i>        | missense variant                            | p.Gly867Ser  |
| 14 | 103369720 | rs747696299     | T | G | 1 | 0.00056 | <i>TRAF3</i>         | missense variant                            | p.Glu363Asp  |
| 14 | 105220205 | chr14:105220205 | T | A | 1 | 0.00056 | <i>SIVA1</i>         | missense variant                            | p.Gln50Leu   |
| 14 | 106110159 | rs370671336     | A | C | 1 | 0.00057 | <i>IGHG2</i>         | missense variant                            | p.Gln153His  |
| 15 | 34648801  | rs762688120     | T | G | 1 | 0.00052 | <i>NUTM1</i>         | missense variant                            | p.Trp864Cys  |
| 15 | 38795473  | rs780796375     | T | A | 1 | 0.00052 | <i>RASGRP1</i>       | missense variant &<br>splice region variant | p.Asp527Glu  |
| 15 | 40585156  | rs868163732     | T | C | 1 | 0.00053 | <i>PLCB2</i>         | missense variant                            | p.Arg766His  |
| 15 | 40587181  | rs759781261     | T | C | 1 | 0.00052 | <i>PLCB2</i>         | stop gained                                 | p.Trp621*    |
| 15 | 40595526  | rs780036197     | T | C | 1 | 0.00052 | <i>PLCB2</i>         | missense variant                            | p.Arg65Gln   |
| 15 | 40685760  | rs752195768     | G | A | 1 | 0.00052 | <i>KNSTRN</i>        | missense variant                            | p.Thr305Ala  |
| 15 | 41826966  | chr15:41826966  | T | C | 1 | 0.00053 | <i>RPAP1</i>         | missense variant                            | p.Ala237Thr  |
| 15 | 41829299  | chr15:41829299  | T | C | 1 | 0.00056 | <i>RPAP1</i>         | missense variant                            | p.Glu9Lys    |
| 15 | 44089095  | chr15:44089095  | A | G | 1 | 0.00052 | <i>RP11-296A16.1</i> | missense variant                            | p.Ala104Val  |
| 15 | 49509426  | chr15:49509426  | C | T | 1 | 0.00052 | <i>GALK2</i>         | missense variant                            | p.Met61Thr   |
| 15 | 50884362  | rs750446200     | A | G | 1 | 0.00052 | <i>TRPM7</i>         | missense variant                            | p.Pro1357Leu |
| 15 | 51520033  | chr15:51520033  | C | T | 1 | 0.00052 | <i>CYP19A1</i>       | missense variant                            | p.Ile132Val  |
| 15 | 51676027  | chr15:51676027  | A | G | 1 | 0.00052 | <i>GLDN</i>          | missense variant                            | p.Gly160Glu  |
| 15 | 51696919  | chr15:51696919  | T | G | 1 | 0.00052 | <i>GLDN</i>          | missense variant                            | p.Val542Leu  |
| 15 | 52181290  | rs765884770     | T | G | 1 | 0.00052 | <i>TMOD3</i>         | missense variant                            | p.Lys148Asn  |
| 15 | 52258005  | rs200556754     | C | T | 1 | 0.00052 | <i>LEO1</i>          | missense variant                            | p.Gln252Arg  |
| 15 | 55483191  | rs747216897     | G | C | 1 | 0.00053 | <i>RSL24D1</i>       | missense variant                            | p.Glu84Gln   |
| 15 | 55647009  | rs777721813     | T | C | 1 | 0.00052 | <i>PIGB</i>          | missense variant                            | p.Pro451Ser  |
| 15 | 59139640  | rs776220227     | C | T | 1 | 0.00052 | <i>FAM63B</i>        | missense variant                            | p.Tyr505His  |
| 15 | 59445847  | chr15:59445847  | A | C | 1 | 0.00052 | <i>MYO1E</i>         | missense variant                            | p.Val1008Leu |
| 15 | 59455396  | chr15:59455396  | A | C | 1 | 0.00052 | <i>MYO1E</i>         | stop gained                                 | p.Glu863*    |
| 15 | 59455489  | chr15:59455489  | G | C | 1 | 0.00052 | <i>MYO1E</i>         | missense variant                            | p.Asp832His  |
| 15 | 59528836  | chr15:59528836  | C | T | 1 | 0.00052 | <i>MYO1E</i>         | missense variant                            | p.Lys123Arg  |
| 15 | 60648141  | chr15:60648141  | C | T | 1 | 0.00052 | <i>ANXA2</i>         | missense variant                            | p.Lys187Glu  |
| 15 | 68445937  | rs772361559     | G | A | 1 | 0.00052 | <i>PIAS1</i>         | missense variant                            | p.Met282Val  |
| 15 | 69076852  | chr15:69076852  | G | T | 1 | 0.00052 | <i>ANP32A</i>        | missense variant                            | p.Lys137Thr  |
| 15 | 74636307  | rs773957723     | A | G | 1 | 0.00053 | <i>CYP11A1</i>       | missense variant                            | p.Arg218Cys  |
| 15 | 75656960  | rs766243508     | T | C | 1 | 0.00054 | <i>MAN2C1</i>        | missense variant                            | p.Gly157Arg  |
| 15 | 75668202  | rs556160377     | T | C | 1 | 0.00052 | <i>SIN3A</i>         | missense variant                            | p.Arg1132Gln |
| 15 | 83826130  | chr15:83826130  | C | A | 1 | 0.00052 | <i>HDGFRP3</i>       | missense variant                            | p.Cys141Gly  |
| 16 | 3073477   | rs369375533     | G | C | 1 | 0.00056 | <i>HCFC1R1</i>       | splice region variant                       | p.Glu50Asp   |
| 16 | 3076523   | chr16:3076523   | C | T | 1 | 0.00052 | <i>THOC6</i>         | missense variant                            | p.Ser140Pro  |
| 16 | 3188362   | chr16:3188362   | C | A | 1 | 0.00052 | <i>ZNF213</i>        | missense variant                            | p.Asn136Thr  |
| 16 | 3199011   | chr16:3199011   | A | G | 1 | 0.00053 | <i>CASP16</i>        | missense variant                            | p.Gly137Arg  |
| 16 | 3367541   | chr16:3367541   | A | C | 1 | 0.00052 | <i>ZNF75A</i>        | missense variant                            | p.Pro188His  |
| 16 | 11137925  | chr16:11137925  | T | A | 1 | 0.00052 | <i>CLEC16A</i>       | missense variant                            | p.Tyr604Phe  |
| 16 | 11525057  | chr16:11525057  | A | C | 1 | 0.00052 | <i>CTD-3088G3.8</i>  | missense variant                            | p.Asp1777Tyr |
| 16 | 22128183  | chr16:22128183  | A | C | 1 | 0.00052 | <i>VWA3A</i>         | missense variant                            | p.Pro307Thr  |
| 16 | 22268697  | rs750035573     | A | G | 1 | 0.00052 | <i>EEF2K</i>         | missense variant                            | p.Gly298Ser  |
| 16 | 22269077  | chr16:22269077  | T | A | 1 | 0.00055 | <i>EEF2K</i>         | missense variant                            | p.Asn339Tyr  |
| 16 | 22360729  | chr16:22360729  | G | A | 1 | 0.00052 | <i>CDR2</i>          | missense variant                            | p.Ile126Thr  |
| 16 | 27374667  | rs372491173     | T | C | 1 | 0.00057 | <i>IL4R</i>          | missense variant                            | p.Pro665Leu  |
| 16 | 27517389  | chr16:27517389  | A | G | 1 | 0.00053 | <i>GTF3C1</i>        | missense variant                            | p.Ser534Phe  |
| 16 | 28842289  | chr16:28842289  | G | C | 1 | 0.00052 | <i>ATXN2L</i>        | missense variant                            | p.Ser406Cys  |
| 16 | 28890023  | chr16:28890023  | A | G | 1 | 0.00053 | <i>ATP2A1</i>        | missense variant                            | p.Glu11Lys   |
| 16 | 28944716  | rs781369027     | T | G | 1 | 0.00052 | <i>CD19</i>          | missense variant                            | p.Val241Leu  |
| 16 | 30122719  | chr16:30122719  | C | T | 1 | 0.00052 | <i>GDPD3</i>         | missense variant                            | p.Ile233Val  |
| 16 | 32264862  | chr16:32264862  | C | A | 1 | 0.00055 | <i>TP53TG3D</i>      | missense variant                            | p.Gln63Pro   |
| 16 | 50745281  | chr16:50745281  | C | G | 1 | 0.00058 | <i>NOD2</i>          | missense variant                            | p.Val487Leu  |
| 16 | 50827504  | chr16:50827504  | G | A | 1 | 0.00052 | <i>CYLD</i>          | missense variant                            | p.Arg800Gly  |
| 16 | 50830312  | chr16:50830312  | A | G | 1 | 0.00052 | <i>CYLD</i>          | missense variant                            | p.Asp922Asn  |

|    |          |                |   |   |   |         |                 |                                                                 |              |
|----|----------|----------------|---|---|---|---------|-----------------|-----------------------------------------------------------------|--------------|
| 16 | 56868349 | chr16:56868349 | T | C | 1 | 0.00052 | <i>NUP93</i>    | stop gained                                                     | p.Arg578*    |
| 16 | 56872886 | rs190565265    | A | G | 1 | 0.00052 | <i>NUP93</i>    | missense variant                                                | p.Ala681Thr  |
| 16 | 66420908 | chr16:66420908 | A | G | 1 | 0.00052 | <i>CDH5</i>     | missense variant                                                | p.Ser136Asn  |
| 16 | 68338035 | chr16:68338035 | C | T | 1 | 0.00052 | <i>SLC7A6OS</i> | missense variant                                                | p.Gln191Arg  |
| 16 | 68842660 | chr16:68842660 | A | C | 1 | 0.00052 | <i>CDH1</i>     | missense variant                                                | p.Thr199Lys  |
| 16 | 68857386 | chr16:68857386 | G | A | 1 | 0.00052 | <i>CDH1</i>     | missense variant                                                | p.Asn674Ser  |
| 16 | 69727203 | chr16:69727203 | G | T | 1 | 0.00052 | <i>NFAT5</i>    | missense variant                                                | p.Phe1159Val |
| 16 | 72132587 | chr16:72132587 | G | T | 1 | 0.00052 | <i>DHX38</i>    | missense variant                                                | p.Ser220Arg  |
| 16 | 72133695 | rs758566056    | G | A | 1 | 0.00053 | <i>DHX38</i>    | missense variant                                                | p.Tyr342Cys  |
| 16 | 72144861 | rs753686955    | T | C | 1 | 0.00058 | <i>DHX38</i>    | missense variant                                                | p.Arg1162Cys |
| 16 | 72170687 | chr16:72170687 | T | C | 1 | 0.00052 | <i>PMFBP1</i>   | missense variant                                                | p.Ser317Asn  |
| 16 | 81957177 | rs781130389    | A | G | 1 | 0.00053 | <i>PLCG2</i>    | missense variant                                                | p.Val799Ile  |
| 16 | 81971363 | chr16:81971363 | G | A | 1 | 0.00052 | <i>PLCG2</i>    | missense variant &<br>splice region variant                     | p.Asp1018Gly |
| 16 | 82033159 | rs756402487    | T | C | 1 | 0.00052 | <i>SDR42E1</i>  | missense variant                                                | p.Ala247Thr  |
| 16 | 82033534 | chr16:82033534 | C | T | 1 | 0.00052 | <i>SDR42E1</i>  | missense variant                                                | p.Ser122Gly  |
| 17 | 3629460  | chr17:3629460  | C | G | 1 | 0.00052 | <i>GSG2</i>     | missense variant                                                | p.Trp744Ser  |
| 17 | 3970509  | chr17:3970509  | T | C | 1 | 0.00052 | <i>ZZEF1</i>    | missense variant                                                | p.Ser1368Asn |
| 17 | 4074042  | rs751428903    | T | C | 1 | 0.00052 | <i>ANKFY1</i>   | missense variant                                                | p.Val1127Ile |
| 17 | 4621619  | rs376221990    | A | G | 1 | 0.00052 | <i>ARRB2</i>    | missense variant                                                | p.Val250Ile  |
| 17 | 4647969  | rs780614708    | A | C | 1 | 0.00057 | <i>ZMYND15</i>  | missense variant                                                | p.Pro578His  |
| 17 | 4836257  | rs780652188    | A | G | 1 | 0.00058 | <i>GP1BA</i>    | missense variant                                                | p.Val120Ile  |
| 17 | 4836714  | chr17:4836714  | C | T | 1 | 0.00052 | <i>GP1BA</i>    | missense variant<br>missense variant &<br>splice region variant | p.Val272Ala  |
| 17 | 4850115  | chr17:4850115  | A | G | 1 | 0.00052 | <i>PFN1</i>     | splice region variant                                           | p.Pro124Ser  |
| 17 | 4858827  | chr17:4858827  | A | G | 1 | 0.00052 | <i>ENO3</i>     | missense variant                                                | p.Asp265Asn  |
| 17 | 4859893  | rs778070292    | G | T | 1 | 0.00052 | <i>ENO3</i>     | missense variant                                                | p.Trp365Gly  |
| 17 | 4881889  | chr17:4881889  | G | C | 1 | 0.00052 | <i>CAMTA2</i>   | missense variant<br>missense variant &<br>splice region variant | p.Glu582Gln  |
| 17 | 4904518  | rs762688180    | T | C | 1 | 0.00052 | <i>KIF1C</i>    | splice region variant                                           | p.Thr62Met   |
| 17 | 5337008  | rs748497469    | G | C | 1 | 0.00052 | <i>C1QBP</i>    | missense variant                                                | p.Cys186Ser  |
| 17 | 7495195  | chr17:7495195  | A | G | 1 | 0.00055 | <i>FXR2</i>     | missense variant                                                | p.Leu659Phe  |
| 17 | 7559181  | chr17:7559181  | A | G | 1 | 0.00053 | <i>ATP1B2</i>   | missense variant                                                | p.Val281Met  |
| 17 | 7592927  | rs776832907    | G | A | 1 | 0.00052 | <i>WRAP53</i>   | missense variant                                                | p.Ile184Val  |
| 17 | 7641314  | chr17:7641314  | A | G | 1 | 0.00052 | <i>DNAH2</i>    | missense variant                                                | p.Ala402Thr  |
| 17 | 11837306 | rs143624582    | A | G | 1 | 0.00052 | <i>DNAH9</i>    | missense variant                                                | p.Arg4136Gln |
| 17 | 19250493 | chr17:19250493 | G | A | 1 | 0.00052 | <i>B9D1</i>     | missense variant<br>stop gained & splice<br>region variant      | p.Ser141Pro  |
| 17 | 21216804 | rs771434728    | A | C | 1 | 0.00057 | <i>MAP2K3</i>   | region variant                                                  | p.Cys305*    |
| 17 | 25973582 | chr17:25973582 | G | A | 1 | 0.00053 | <i>LGALS9</i>   | missense variant                                                | p.Ile213Val  |
| 17 | 26089860 | rs759222198    | A | G | 1 | 0.00055 | <i>NOS2</i>     | missense variant                                                | p.His922Tyr  |
| 17 | 26114833 | chr17:26114833 | A | T | 1 | 0.00052 | <i>NOS2</i>     | missense variant                                                | p.Lys113Ile  |
| 17 | 33591242 | chr17:33591242 | G | C | 1 | 0.00052 | <i>SLFN5</i>    | stop gained                                                     | p.Tyr393*    |
| 17 | 34191275 | chr17:34191275 | G | A | 1 | 0.00052 | <i>C17orf66</i> | missense variant                                                | p.Phe181Ser  |
| 17 | 34431333 | chr17:34431333 | G | T | 1 | 0.00052 | <i>CCL4</i>     | missense variant                                                | p.Met12Arg   |
| 17 | 36454466 | chr17:36454466 | T | C | 1 | 0.00052 | <i>MRPL45</i>   | missense variant                                                | p.Arg40Cys   |
| 17 | 36628240 | chr17:36628240 | G | A | 1 | 0.00053 | <i>ARHGAP23</i> | missense variant                                                | p.Lys704Arg  |
| 17 | 37825912 | rs755016927    | C | T | 1 | 0.00057 | <i>PNMT</i>     | missense variant                                                | p.Ile78Thr   |
| 17 | 37948943 | chr17:37948943 | C | T | 1 | 0.00052 | <i>IKZF3</i>    | missense variant                                                | p.His136Arg  |
| 17 | 38251356 | chr17:38251356 | G | C | 1 | 0.00053 | <i>NR1D1</i>    | missense variant                                                | p.Met422Ile  |
| 17 | 38433379 | rs762490491    | A | C | 1 | 0.00052 | <i>WIPF2</i>    | missense variant                                                | p.Pro409Thr  |
| 17 | 38787050 | chr17:38787050 | A | G | 1 | 0.00052 | <i>SMARCE1</i>  | stop gained                                                     | p.Gln315*    |
| 17 | 38813616 | chr17:38813616 | C | T | 1 | 0.00052 | <i>KRT222</i>   | missense variant                                                | p.His216Arg  |
| 17 | 38816383 | chr17:38816383 | G | A | 1 | 0.00052 | <i>KRT222</i>   | missense variant                                                | p.Ile101Thr  |
| 17 | 40155571 | rs782268381    | G | T | 1 | 0.00053 | <i>DNAJC7</i>   | missense variant                                                | p.Thr28Pro   |
| 17 | 40257809 | rs201235598    | T | C | 1 | 0.00056 | <i>DHX58</i>    | missense variant                                                | p.Arg399Gln  |
| 17 | 40257975 | chr17:40257975 | A | G | 1 | 0.00055 | <i>DHX58</i>    | missense variant                                                | p.His344Tyr  |
| 17 | 40260008 | chr17:40260008 | G | C | 1 | 0.00055 | <i>DHX58</i>    | missense variant                                                | p.Ser266Thr  |
| 17 | 40270392 | chr17:40270392 | A | T | 1 | 0.00054 | <i>KAT2A</i>    | missense variant                                                | p.Tyr368Phe  |
| 17 | 40271354 | rs782687964    | T | C | 1 | 0.00052 | <i>KAT2A</i>    | missense variant                                                | p.Val328Ile  |
| 17 | 40376852 | chr17:40376852 | T | C | 1 | 0.00052 | <i>STAT5B</i>   | missense variant                                                | p.Arg107His  |
| 17 | 40842136 | rs147189145    | A | G | 1 | 0.00052 | <i>CNTNAP1</i>  | missense variant                                                | p.Arg589Gln  |
| 17 | 41180612 | rs143507179    | A | G | 1 | 0.00057 | <i>RND2</i>     | missense variant                                                | p.Arg201Gln  |
| 17 | 41246104 | chr17:41246104 | A | T | 1 | 0.00052 | <i>BRCA1</i>    | missense variant                                                | p.Ile482Phe  |
| 17 | 43316428 | chr17:43316428 | C | T | 1 | 0.00052 | <i>FMNL1</i>    | missense variant                                                | p.Leu359Ser  |
| 17 | 45820084 | chr17:45820084 | C | G | 1 | 0.00057 | <i>TBX21</i>    | missense variant<br>missense variant &<br>splice region variant | p.Gln200His  |
| 17 | 45820439 | rs768130869    | G | A | 1 | 0.00054 | <i>TBX21</i>    | splice region variant                                           | p.Asn217Asp  |
| 17 | 45915629 | rs758226121    | T | G | 1 | 0.00055 | <i>SCRN2</i>    | missense variant                                                | p.Pro376Thr  |

|    |          |                |   |   |   |         |                     |                       |              |
|----|----------|----------------|---|---|---|---------|---------------------|-----------------------|--------------|
| 17 | 45916930 | rs773195495    | A | C | 1 | 0.00055 | <i>SCRN2</i>        | missense variant      | p.Gly154Cys  |
| 17 | 47018301 | chr17:47018301 | T | C | 1 | 0.00052 | <i>SNF8</i>         | missense variant      | p.Val77Met   |
| 17 | 48245089 | chr17:48245089 | T | G | 1 | 0.00054 | <i>SGCA</i>         | missense variant      | p.Val102Phe  |
| 17 | 48940763 | chr17:48940763 | A | G | 1 | 0.00052 | <i>TOB1</i>         | missense variant      | p.Pro206Ser  |
| 17 | 49156947 | chr17:49156947 | C | T | 1 | 0.00052 | <i>SPAG9</i>        | splice region variant | p.Gln141Arg  |
| 17 | 54912595 | chr17:54912595 | A | T | 1 | 0.00052 | <i>DGKE</i>         | missense variant      | p.Cys147Ser  |
| 17 | 54978936 | chr17:54978936 | T | C | 1 | 0.00053 | <i>TRIM25</i>       | missense variant      | p.Ala311Thr  |
| 17 | 55058579 | chr17:55058579 | T | C | 1 | 0.00052 | <i>SCPEP1</i>       | missense variant      | p.His60Tyr   |
| 17 | 56058153 | chr17:56058153 | C | T | 1 | 0.00052 | <i>VEZF1</i>        | missense variant      | p.Met81Val   |
| 17 | 56232756 | chr17:56232756 | A | T | 1 | 0.00052 | <i>OR4D1</i>        | missense variant      | p.Met81Lys   |
| 17 | 56434758 | chr17:56434758 | A | C | 1 | 0.00053 | <i>RNF43</i>        | missense variant      | p.Lys666Asn  |
| 17 | 58040502 | chr17:58040502 | G | A | 1 | 0.00052 | <i>RNFT1</i>        | missense variant      | p.Leu67Ser   |
| 17 | 61829344 | chr17:61829344 | A | G | 1 | 0.00052 | <i>RP11-51F16.8</i> | stop gained           | p.Arg38*     |
| 17 | 61895253 | chr17:61895253 | T | A | 1 | 0.00053 | <i>DDX42</i>        | missense variant      | p.Asn771Ile  |
| 17 | 61895456 | rs556300636    | T | C | 1 | 0.00055 | <i>DDX42</i>        | missense variant      | p.Arg839Cys  |
| 17 | 61908463 | rs534233529    | T | C | 1 | 0.00052 | <i>PSMCS5</i>       | stop gained           | p.Arg109*    |
| 17 | 64876683 | rs138881080    | A | G | 1 | 0.00052 | <i>CACNG5</i>       | missense variant      | p.Arg98His   |
| 17 | 72540951 | rs759032539    | G | T | 1 | 0.00052 | <i>CD300C</i>       | missense variant      | p.Asp66Ala   |
| 17 | 73231295 | rs768393987    | G | A | 1 | 0.00052 | <i>NUP85</i>        | splice region variant | p.Gln623Arg  |
| 17 | 73234695 | chr17:73234695 | A | G | 1 | 0.00054 | <i>GGA3</i>         | missense variant      | p.Pro74Leu   |
| 17 | 73258891 | chr17:73258891 | A | C | 1 | 0.00052 | <i>MRPS7</i>        | missense variant      | p.Phe123Leu  |
| 17 | 73727019 | rs778104417    | A | G | 1 | 0.00053 | <i>ITGB4</i>        | missense variant      | p.Val356Met  |
| 17 | 73727044 | rs370095218    | G | A | 1 | 0.00054 | <i>ITGB4</i>        | splice region variant | p.Asn364Ser  |
| 17 | 74622810 | rs138031739    | T | C | 1 | 0.00053 | <i>ST6GALNAC1</i>   | missense variant      | p.Gly412Ser  |
| 17 | 76421538 | chr17:76421538 | T | C | 1 | 0.00053 | <i>DNAH17</i>       | missense variant      | p.Glu4367Lys |
| 17 | 76831448 | rs148192093    | C | G | 1 | 0.00053 | <i>USP36</i>        | missense variant      | p.Thr130Ser  |
| 17 | 76968019 | chr17:76968019 | C | T | 1 | 0.00052 | <i>LGALS3BP</i>     | missense variant      | p.His466Arg  |
| 17 | 76993315 | chr17:76993315 | C | T | 1 | 0.00053 | <i>CANT1</i>        | missense variant      | p.Lys77Glu   |
| 18 | 670767   | rs373096647    | T | A | 1 | 0.00052 | <i>TYMS</i>         | missense variant      | p.Gln211Leu  |
| 18 | 743022   | chr18:743022   | G | T | 1 | 0.00052 | <i>YES1</i>         | missense variant      | p.Gln324Pro  |
| 18 | 2891408  | chr18:2891408  | A | G | 1 | 0.00052 | <i>EMILIN2</i>      | missense variant      | p.Gly428Glu  |
| 18 | 2891449  | chr18:2891449  | A | C | 1 | 0.00052 | <i>EMILIN2</i>      | missense variant      | p.Pro442Thr  |
| 18 | 8406128  | chr18:8406128  | A | G | 1 | 0.00052 | <i>PTPRM</i>        | missense variant      | p.Glu1457Lys |
| 18 | 9256796  | chr18:9256796  | T | G | 1 | 0.00052 | <i>ANKRD12</i>      | missense variant      | p.Lys1177Asn |
| 18 | 12686304 | rs762367925    | C | T | 1 | 0.00052 | <i>CEP76</i>        | missense variant      | p.Gln360Arg  |
| 18 | 13885084 | chr18:13885084 | T | C | 1 | 0.00054 | <i>MC2R</i>         | missense variant      | p.Arg145His  |
| 18 | 18559886 | rs775538267    | C | T | 1 | 0.00053 | <i>ROCK1</i>        | missense variant      | p.Glu880Gly  |
| 18 | 48581159 | chr18:48581159 | G | A | 1 | 0.00052 | <i>SMAD4</i>        | missense variant      | p.Ser155Gly  |
| 18 | 54362397 | chr18:54362397 | G | A | 1 | 0.00052 | <i>WDR7</i>         | missense variant      | p.Gln442Arg  |
| 18 | 55335743 | chr18:55335743 | G | C | 1 | 0.00052 | <i>ATP8B1</i>       | missense variant      | p.Lys709Asn  |
| 19 | 3735930  | rs565934761    | A | G | 1 | 0.00052 | <i>TJP3</i>         | missense variant      | p.Arg408His  |
| 19 | 4212678  | rs375444482    | T | C | 1 | 0.00056 | <i>ANKRD24</i>      | missense variant      | p.Arg484Trp  |
| 19 | 6380353  | chr19:6380353  | A | T | 1 | 0.00052 | <i>GTF2F1</i>       | missense variant      | p.Lys498Met  |
| 19 | 6467946  | chr19:6467946  | C | T | 1 | 0.00053 | <i>DENND1C</i>      | missense variant      | p.Thr659Ala  |
| 19 | 6468372  | chr19:6468372  | C | T | 1 | 0.00056 | <i>DENND1C</i>      | missense variant      | p.Glu555Gly  |
| 19 | 6697719  | rs771305132    | T | C | 1 | 0.00053 | <i>C3</i>           | missense variant      | p.Glu843Lys  |
| 19 | 6719341  | rs780548430    | C | G | 1 | 0.00057 | <i>C3</i>           | missense variant      | p.Gln50Glu   |
| 19 | 6735921  | chr19:6735921  | G | A | 1 | 0.00052 | <i>GPR108</i>       | splice region variant | p.Ser97Pro   |
| 19 | 6832126  | rs144739934    | A | G | 1 | 0.00052 | <i>VAV1</i>         | missense variant      | p.Glu475Lys  |
| 19 | 7686101  | rs777686042    | T | C | 1 | 0.00056 | <i>XAB2</i>         | missense variant      | p.Arg567His  |
| 19 | 7689210  | rs763248298    | A | G | 1 | 0.00059 | <i>XAB2</i>         | missense variant      | p.Ser315Leu  |
| 19 | 7695745  | chr19:7695745  | G | T | 1 | 0.00053 | <i>PET100</i>       | missense variant      | p.Phe51Val   |
| 19 | 7712634  | chr19:7712634  | G | A | 1 | 0.00056 | <i>STXBP2</i>       | missense variant      | p.Thr585Ala  |
| 19 | 7743449  | rs757755213    | C | T | 1 | 0.00052 | <i>C19orf59</i>     | missense variant      | p.Met149Thr  |
| 19 | 7810715  | rs745378205    | G | A | 1 | 0.00054 | <i>CD209</i>        | missense variant      | p.Ile146Thr  |
| 19 | 10091356 | rs368541624    | A | G | 1 | 0.00053 | <i>COL5A3</i>       | stop gained           | p.Gln858*    |
| 19 | 10257109 | rs770079133    | C | G | 1 | 0.00053 | <i>DNMT1</i>        | missense variant      | p.Leu938Val  |
| 19 | 10395926 | chr19:10395926 | T | C | 1 | 0.00053 | <i>ICAM1</i>        | missense variant      | p.Thr521Ile  |
| 19 | 10812642 | chr19:10812642 | G | A | 1 | 0.00054 | <i>QTRT1</i>        | missense variant      | p.Gln87Arg   |
| 19 | 11033825 | rs750963587    | A | G | 1 | 0.00055 | <i>YIPF2</i>        | missense variant      | p.Ser188Phe  |
| 19 | 11118683 | chr19:11118683 | A | G | 1 | 0.00053 | <i>SMARCA4</i>      | missense variant      | p.Ala703Thr  |
| 19 | 11332620 | chr19:11332620 | T | C | 1 | 0.00056 | <i>DOCK6</i>        | missense variant      | p.Ala1153Thr |
| 19 | 12126310 | chr19:12126310 | T | G | 1 | 0.00052 | <i>ZNF433</i>       | missense variant      | p.Pro458Thr  |
| 19 | 12841792 | chr19:12841792 | A | G | 1 | 0.00053 | <i>C19orf43</i>     | missense variant      | p.Arg172Trp  |
| 19 | 12858827 | rs774637174    | T | C | 1 | 0.00054 | <i>ASNA1</i>        | missense variant      | p.Pro319Leu  |

|    |          |                |   |   |   |         |                    |                  |              |
|----|----------|----------------|---|---|---|---------|--------------------|------------------|--------------|
| 19 | 12981975 | chr19:12981975 | T | G | 1 | 0.00055 | <i>MAST1</i>       | missense variant | p.Glu1084Asp |
| 19 | 14200056 | rs563414303    | G | C | 1 | 0.00053 | <i>SAMD1</i>       | missense variant | p.Gly252Ala  |
| 19 | 16268042 | rs75384630     | A | G | 1 | 0.00054 | <i>HSH2D</i>       | missense variant | p.Cys166Tyr  |
| 19 | 17394286 | chr19:17394286 | T | C | 1 | 0.00056 | <i>ANKLE1</i>      | missense variant | p.Pro238Leu  |
| 19 | 17892605 | chr19:17892605 | T | C | 1 | 0.00056 | <i>FCHO1</i>       | missense variant | p.Ala645Val  |
| 19 | 18218419 | chr19:18218419 | A | G | 1 | 0.00055 | <i>MAST3</i>       | missense variant | p.Arg21Gln   |
| 19 | 18256001 | rs761394244    | A | G | 1 | 0.00056 | <i>MAST3</i>       | missense variant | p.Gly972Ser  |
| 19 | 18474257 | rs771517091    | G | C | 1 | 0.00053 | <i>PGPEP1</i>      | missense variant | p.Ala165Gly  |
| 19 | 18965798 | chr19:18965798 | C | T | 1 | 0.00057 | <i>UPF1</i>        | missense variant | p.Leu470Pro  |
| 19 | 35775938 | rs767080313    | G | A | 1 | 0.00052 | <i>HAMP</i>        | missense variant | p.Lys83Arg   |
| 19 | 35802832 | chr19:35802832 | G | C | 1 | 0.00055 | <i>MAG</i>         | missense variant | p.Thr543Arg  |
| 19 | 35832254 | chr19:35832254 | G | C | 1 | 0.00055 | <i>CD22</i>        | missense variant | p.Arg506Gly  |
| 19 | 36302916 | chr19:36302916 | A | G | 1 | 0.00057 | <i>PRODH2</i>      | missense variant | p.Ala258Val  |
| 19 | 36332658 | chr19:36332658 | T | G | 1 | 0.00052 | <i>NPHS1</i>       | missense variant | p.Ala925Asp  |
| 19 | 38980762 | rs775643457    | A | G | 1 | 0.00055 | <i>RYR1</i>        | missense variant | p.Arg1954His |
| 19 | 39001174 | rs768538971    | T | C | 1 | 0.00052 | <i>RYR1</i>        | missense variant | p.Pro2990Leu |
| 19 | 39307959 | rs757032356    | T | C | 1 | 0.00057 | <i>ECH1</i>        | missense variant | p.Gly174Arg  |
| 19 | 39439250 | rs763629297    | T | C | 1 | 0.00054 | <i>CTC-360G5.8</i> | missense variant | p.Val44Met   |
| 19 | 39884243 | rs771903804    | G | T | 1 | 0.00052 | <i>MED29</i>       | missense variant | p.Phe130Cys  |
| 19 | 39975837 | chr19:39975837 | G | C | 1 | 0.00054 | <i>TIMM50</i>      | missense variant | p.Ser110Trp  |
| 19 | 39977097 | rs766277051    | T | C | 1 | 0.00053 | <i>TIMM50</i>      | missense variant | p.Arg323Trp  |
| 19 | 40097959 | rs193269928    | C | T | 1 | 0.00052 | <i>LGALS13</i>     | missense variant | p.Ser134Pro  |
| 19 | 41826311 | chr19:41826311 | A | G | 1 | 0.00055 | <i>CCDC97</i>      | missense variant | p.Glu283Lys  |
| 19 | 42584038 | chr19:42584038 | T | C | 1 | 0.00058 | <i>ZNF574</i>      | missense variant | p.Pro517Leu  |
| 19 | 49207142 | chr19:49207142 | A | C | 1 | 0.00052 | <i>FUT2</i>        | missense variant | p.Thr310Asn  |
| 19 | 49376671 | chr19:49376671 | C | G | 1 | 0.00054 | <i>PPP1R15A</i>    | missense variant | p.Glu61Gln   |
| 19 | 49477932 | chr19:49477932 | T | A | 1 | 0.00054 | <i>GYS1</i>        | missense variant | p.Ile456Asn  |
| 19 | 49930177 | chr19:49930177 | A | G | 1 | 0.00052 | <i>GFY</i>         | missense variant | p.Glu164Lys  |
| 19 | 49989350 | chr19:49989350 | A | G | 1 | 0.00052 | <i>FLT3LG</i>      | missense variant | p.Gly151Asp  |
| 19 | 50004387 | chr19:50004387 | A | G | 1 | 0.00059 | <i>hsa-mir-150</i> | missense variant | p.Gly203Arg  |
| 19 | 50138844 | chr19:50138844 | G | C | 1 | 0.00056 | <i>RRAS</i>        | missense variant | p.Val216Leu  |
| 19 | 50165277 | rs368333462    | T | C | 1 | 0.00056 | <i>IRF3</i>        | missense variant | p.Gly304Arg  |
| 19 | 50170397 | rs751409023    | T | C | 1 | 0.00052 | <i>BCL2L12</i>     | missense variant | p.Pro161Ser  |
| 19 | 50804997 | rs777220522    | A | G | 1 | 0.00056 | <i>MYH14</i>       | missense variant | p.Arg1850Gln |
| 19 | 50940957 | rs750573077    | C | G | 1 | 0.00052 | <i>MYBPC2</i>      | missense variant | p.Ser185Thr  |
| 19 | 53208747 | chr19:53208747 | A | G | 1 | 0.00052 | <i>ZNF611</i>      | missense variant | p.Arg521Cys  |
| 19 | 54299219 | rs770386298    | T | G | 1 | 0.00052 | <i>NLRP12</i>      | missense variant | p.Gln999Lys  |
| 19 | 54848366 | chr19:54848366 | C | A | 1 | 0.00058 | <i>LILRA4</i>      | missense variant | p.Val334Gly  |
| 19 | 55019328 | chr19:55019328 | C | T | 1 | 0.00052 | <i>LAIR2</i>       | missense variant | p.Leu98Pro   |
| 19 | 55420766 | rs759022000    | T | C | 1 | 0.00054 | <i>NCR1</i>        | missense variant | p.Ala173Val  |
| 19 | 55493915 | chr19:55493915 | G | C | 1 | 0.00054 | <i>NLRP2</i>       | missense variant | p.Ile283Met  |
| 19 | 55501899 | chr19:55501899 | C | A | 1 | 0.00052 | <i>NLRP2</i>       | missense variant | p.Asn856Thr  |
| 19 | 56189019 | rs762919490    | G | C | 1 | 0.00052 | <i>EPN1</i>        | missense variant | p.Leu51Val   |
| 19 | 56249609 | rs370177421    | G | C | 1 | 0.00052 | <i>NLRP9</i>       | missense variant | p.Trp44Cys   |
| 19 | 56369414 | chr19:56369414 | G | A | 1 | 0.00052 | <i>NLRP4</i>       | missense variant | p.Ile219Val  |
| 19 | 56549541 | chr19:56549541 | C | G | 1 | 0.00052 | <i>NLRP5</i>       | missense variant | p.Gln922His  |
| 20 | 1209111  | chr20:1209111  | G | A | 1 | 0.00052 | <i>RAD21L1</i>     | missense variant | p.His5Arg    |
| 20 | 2636276  | chr20:2636276  | A | G | 1 | 0.00052 | <i>NOP56</i>       | missense variant | p.Glu265Lys  |
| 20 | 2637178  | rs758338406    | T | G | 1 | 0.00053 | <i>NOP56</i>       | missense variant | p.Arg381Leu  |
| 20 | 5924282  | rs762857318    | G | A | 1 | 0.00052 | <i>TRMT6</i>       | missense variant | p.Ile197Thr  |
| 20 | 5996127  | chr20:5996127  | A | C | 1 | 0.00052 | <i>CRLS1</i>       | missense variant | p.Leu189Ile  |
| 20 | 18474669 | chr20:18474669 | C | T | 1 | 0.00052 | <i>RBBP9</i>       | missense variant | p.Thr61Ala   |
| 20 | 35128750 | chr20:35128750 | T | C | 1 | 0.00056 | <i>DLGAP4</i>      | missense variant | p.Arg750Trp  |
| 20 | 36999931 | chr20:36999931 | A | G | 1 | 0.00052 | <i>LBP</i>         | missense variant | p.Val409Met  |
| 20 | 39796502 | chr20:39796502 | G | A | 1 | 0.00052 | <i>PLCG1</i>       | missense variant | p.Tyr771Cys  |
| 20 | 39833241 | chr20:39833241 | G | C | 1 | 0.00052 | <i>ZHX3</i>        | missense variant | p.Asp106His  |
| 20 | 43043264 | chr20:43043264 | C | T | 1 | 0.00055 | <i>HNF4A</i>       | missense variant | p.Tyr204His  |
| 20 | 44334528 | rs770731996    | C | T | 1 | 0.00052 | <i>WFDC13</i>      | missense variant | p.Ile89Thr   |
| 20 | 44521413 | rs752113422    | T | C | 1 | 0.00052 | <i>CTSA</i>        | missense variant | p.Pro183Leu  |
| 20 | 44523364 | chr20:44523364 | T | G | 1 | 0.00053 | <i>CTSA</i>        | missense variant | p.Val303Leu  |
| 20 | 44523736 | chr20:44523736 | G | A | 1 | 0.00056 | <i>CTSA</i>        | missense variant | p.Asn369Ser  |
| 20 | 44527063 | rs147472210    | T | C | 1 | 0.00055 | <i>CTSA</i>        | missense variant | p.Arg491Cys  |
| 20 | 44533657 | chr20:44533657 | A | G | 1 | 0.00055 | <i>PLTP</i>        | missense variant | p.Ser289Phe  |
| 20 | 44538288 | chr20:44538288 | T | C | 1 | 0.00053 | <i>PLTP</i>        | missense variant | p.Ala138Thr  |
| 20 | 44669120 | chr20:44669120 | T | A | 1 | 0.00052 | <i>SLC12A5</i>     | missense variant | p.Met264Leu  |
| 20 | 44698964 | chr20:44698964 | G | C | 1 | 0.00052 | <i>NCOA5</i>       | missense variant | p.Val84Leu   |
| 20 | 44698973 | rs746747724    | T | C | 1 | 0.00052 | <i>NCOA5</i>       | missense variant | p.Val81Ile   |
| 20 | 46276064 | rs370656650    | G | C | 1 | 0.00052 | <i>NCOA3</i>       | missense variant | p.Pro1167Arg |
| 20 | 46277774 | chr20:46277774 | C | T | 1 | 0.00052 | <i>NCOA3</i>       | missense variant | p.Leu1191Pro |

|    |          |                |   |   |   |         |                 |                       |              |
|----|----------|----------------|---|---|---|---------|-----------------|-----------------------|--------------|
| 20 | 47628572 | rs767937591    | T | C | 1 | 0.00052 | <i>ARFGEF2</i>  | missense variant      | p.Ala1290Val |
| 20 | 47691971 | rs754442648    | A | G | 1 | 0.00052 | <i>CSE1L</i>    | missense variant      | p.Ala417Thr  |
| 20 | 47736550 | chr20:47736550 | A | G | 1 | 0.00052 | <i>STAU1</i>    | missense variant      | p.Pro361Leu  |
| 20 | 48524826 | chr20:48524826 | T | C | 1 | 0.00055 | <i>SPATA2</i>   | missense variant      | p.Glu68Lys   |
| 20 | 49211907 | rs768291837    | G | C | 1 | 0.00052 | <i>FAM65C</i>   | splice region variant | p.Glu683Asp  |
| 20 | 49236613 | chr20:49236613 | G | A | 1 | 0.00052 | <i>FAM65C</i>   | missense variant      | p.Met60Thr   |
| 20 | 50400814 | rs373555761    | A | G | 1 | 0.00052 | <i>SALL4</i>    | missense variant      | p.Ala1051Val |
| 20 | 61488954 | rs528649129    | A | C | 1 | 0.00053 | <i>TCFL5</i>    | missense variant      | p.Arg344Leu  |
| 20 | 61538566 | rs758731690    | C | T | 1 | 0.00052 | <i>DIDO1</i>    | missense variant      | p.Lys436Arg  |
| 20 | 61542285 | rs768637738    | A | G | 1 | 0.00053 | <i>DIDO1</i>    | missense variant      | p.Ser227Phe  |
| 20 | 62224435 | rs776946146    | G | A | 1 | 0.00052 | <i>GMEB2</i>    | splice region variant | p.Val207Ala  |
| 21 | 26961170 | chr21:26961170 | T | G | 1 | 0.00052 | <i>MRPL39</i>   | missense variant      | p.Leu316Ile  |
| 21 | 26976136 | chr21:26976136 | C | T | 1 | 0.00053 | <i>MRPL39</i>   | missense variant      | p.Lys131Arg  |
| 21 | 33043893 | chr21:33043893 | G | C | 1 | 0.00052 | <i>SCAF4</i>    | missense variant      | p.Gly1088Ala |
| 21 | 33063237 | rs775209963    | A | C | 1 | 0.00052 | <i>SCAF4</i>    | missense variant      | p.Lys586Asn  |
| 21 | 33065690 | rs753270057    | T | C | 1 | 0.00052 | <i>SCAF4</i>    | missense variant      | p.Arg477Gln  |
| 21 | 33692919 | chr21:33692919 | A | G | 1 | 0.00052 | <i>URB1</i>     | missense variant      | p.Ala1839Val |
| 21 | 33711108 | chr21:33711108 | A | G | 1 | 0.00052 | <i>URB1</i>     | missense variant      | p.Pro1473Leu |
| 21 | 33757904 | rs114003733    | C | A | 1 | 0.00052 | <i>URB1</i>     | missense variant      | p.Cys78Gly   |
| 21 | 34029111 | chr21:34029111 | T | C | 1 | 0.00052 | <i>SYNJ1</i>    | missense variant      | p.Gly933Asp  |
| 21 | 34115608 | chr21:34115608 | C | T | 1 | 0.00053 | <i>PAXBP1</i>   | missense variant      | p.Asn762Ser  |
| 21 | 34793899 | rs756119057    | G | A | 1 | 0.00052 | <i>IFNGR2</i>   | missense variant      | p.Met126Val  |
| 21 | 34883568 | chr21:34883568 | A | G | 1 | 0.00052 | <i>GART</i>     | stop gained           | p.Arg769*    |
| 21 | 34951771 | chr21:34951771 | T | G | 1 | 0.00052 | <i>DONSON</i>   | stop gained           | p.Ser483*    |
| 21 | 35140120 | chr21:35140120 | G | A | 1 | 0.00052 | <i>ITSN1</i>    | missense variant      | p.Lys344Glu  |
| 21 | 35147336 | chr21:35147336 | C | G | 1 | 0.00052 | <i>ITSN1</i>    | missense variant      | p.Arg507Thr  |
| 21 | 40552306 | rs751396324    | C | T | 1 | 0.00052 | <i>PSMG1</i>    | missense variant      | p.Lys100Glu  |
| 21 | 40670370 | chr21:40670370 | A | G | 1 | 0.00052 | <i>BRWD1</i>    | missense variant      | p.Arg113Cys  |
| 21 | 40795356 | rs753208196    | A | T | 1 | 0.00054 | <i>LCA5L</i>    | missense variant      | p.Gln128Leu  |
| 21 | 42749774 | chr21:42749774 | G | T | 1 | 0.00058 | <i>MX2</i>      | missense variant      | p.Leu103Arg  |
| 21 | 42754475 | rs764566059    | A | G | 1 | 0.00055 | <i>MX2</i>      | missense variant      | p.Arg239Gln  |
| 21 | 42809035 | rs749472574    | C | T | 1 | 0.00052 | <i>MX1</i>      | missense variant      | p.Ile131Thr  |
| 21 | 43770070 | chr21:43770070 | G | T | 1 | 0.00056 | <i>TF2</i>      | missense variant      | p.Asp50Ala   |
| 21 | 43838576 | chr21:43838576 | C | T | 1 | 0.00052 | <i>UBASH3A</i>  | missense variant      | p.Tyr302His  |
| 21 | 43905847 | rs778786028    | T | G | 1 | 0.00052 | <i>RSPH1</i>    | missense variant      | p.Gln145Lys  |
| 21 | 45103166 | rs755653178    | A | G | 1 | 0.00052 | <i>RRP1B</i>    | missense variant      | p.Gly268Asp  |
| 21 | 45479062 | chr21:45479062 | G | T | 1 | 0.00052 | <i>TRAPPC10</i> | missense variant      | p.Phe253Val  |
| 21 | 45507594 | chr21:45507594 | T | G | 1 | 0.00053 | <i>TRAPPC10</i> | missense variant      | p.Ala852Ser  |
| 21 | 45655275 | rs569961030    | C | T | 1 | 0.00055 | <i>ICOSLG</i>   | missense variant      | p.Met193Val  |
| 21 | 46226843 | rs368636514    | A | G | 1 | 0.00055 | <i>SUMO3</i>    | missense variant      | p.Arg129Cys  |
| 22 | 18138586 | rs773884030    | C | T | 1 | 0.00052 | <i>BCL2L13</i>  | missense variant      | p.Ser37Pro   |
| 22 | 19506390 | rs778665661    | T | C | 1 | 0.00053 | <i>CDC45</i>    | missense variant      | p.Arg586Trp  |
| 22 | 19707965 | chr22:19707965 | G | C | 1 | 0.00058 | <i>SEPT5</i>    | missense variant      | p.Pro171Arg  |
| 22 | 20457733 | chr22:20457733 | T | C | 1 | 0.00052 | <i>RIMBP3</i>   | missense variant      | p.Arg1190Gln |
| 22 | 21167698 | chr22:21167698 | T | G | 1 | 0.00052 | <i>PI4KA</i>    | missense variant      | p.Thr318Lys  |
| 22 | 21384134 | rs371746371    | G | C | 1 | 0.00054 | <i>SLC7A4</i>   | missense variant      | p.Val497Leu  |
| 22 | 22312884 | chr22:22312884 | T | G | 1 | 0.00056 | <i>TOP3B</i>    | missense variant      | p.Pro696His  |
| 22 | 24437627 | chr22:24437627 | T | C | 1 | 0.00052 | <i>CABIN1</i>   | missense variant      | p.Pro84Leu   |
| 22 | 24492045 | rs745725059    | G | A | 1 | 0.00052 | <i>CABIN1</i>   | splice region variant | p.Lys1313Arg |
| 22 | 26895183 | rs751102347    | C | T | 1 | 0.00052 | <i>TFIP11</i>   | missense variant      | p.Thr406Ala  |
| 22 | 30057288 | rs753300935    | T | C | 1 | 0.00052 | <i>NF2</i>      | missense variant      | p.Pro257Leu  |
| 22 | 30189580 | rs775679720    | T | C | 1 | 0.00058 | <i>ASCC2</i>    | missense variant      | p.Val592Met  |
| 22 | 30508498 | chr22:30508498 | A | C | 1 | 0.00053 | <i>HORMAD2</i>  | missense variant      | p.Pro110His  |
| 22 | 30866505 | chr22:30866505 | A | C | 1 | 0.00052 | <i>SEC14L3</i>  | missense variant      | p.Arg40Leu   |
| 22 | 32498054 | chr22:32498054 | T | C | 1 | 0.00052 | <i>SLC5A1</i>   | missense variant      | p.Arg499Cys  |
| 22 | 37865907 | chr22:37865907 | G | A | 1 | 0.00054 | <i>MFNG</i>     | missense variant      | p.Ile71Thr   |
| 22 | 40283748 | rs766301195    | A | G | 1 | 0.00052 | <i>ENTHD1</i>   | missense variant      | p.Ala2Val    |
| 22 | 41660778 | chr22:41660778 | G | A | 1 | 0.00056 | <i>RANGAP1</i>  | missense variant      | p.Phe124Leu  |
| 22 | 42262870 | rs752927725    | C | T | 1 | 0.00052 | <i>SREBF2</i>   | missense variant      | p.Phe42Leu   |
| 22 | 46654517 | chr22:46654517 | T | G | 1 | 0.00052 | <i>PKDREJ</i>   | missense variant      | p.Pro1568His |
| 22 | 50279232 | chr22:50279232 | C | T | 1 | 0.00053 | <i>ZBED4</i>    | missense variant      | p.Phe641Ser  |
| 22 | 50279355 | chr22:50279355 | G | A | 1 | 0.00052 | <i>ZBED4</i>    | missense variant      | p.Asn682Ser  |
| 22 | 50488649 | chr22:50488649 | A | G | 1 | 0.00052 | <i>TLL8</i>     | missense variant      | p.His63Tyr   |
| 22 | 50678670 | chr22:50678670 | T | C | 1 | 0.00054 | <i>TUBGCP6</i>  | missense variant      | p.Glu290Lys  |
| 22 | 50682428 | chr22:50682428 | T | C | 1 | 0.00052 | <i>TUBGCP6</i>  | missense variant      | p.Ser154Asn  |
| 23 | 12939607 | chrX:12939607  | A | T | 1 | 0.00056 | <i>TLR8</i>     | missense variant      | p.Ser834Arg  |

|    |           |                |   |   |   |         |                 |                                             |              |
|----|-----------|----------------|---|---|---|---------|-----------------|---------------------------------------------|--------------|
| 23 | 30322733  | chrX:30322733  | C | T | 1 | 0.00056 | <i>NROB1</i>    | missense variant                            | p.Asp459Gly  |
| 23 | 38535020  | rs201317934    | G | A | 1 | 0.00056 | <i>TM4SF2</i>   | missense variant                            | p.His198Arg  |
| 23 | 41060529  | rs773181993    | G | A | 1 | 0.00056 | <i>USP9X</i>    | missense variant                            | p.Asn1607Ser |
| 23 | 47517190  | chrX:47517190  | A | C | 1 | 0.00056 | <i>UXT</i>      | missense variant                            | p.Glu69Asp   |
| 23 | 49032152  | chrX:49032152  | A | T | 1 | 0.00058 | <i>PRICKLE3</i> | missense variant                            | p.His585Leu  |
| 23 | 49050780  | chrX:49050780  | T | C | 1 | 0.00057 | <i>SYP</i>      | missense variant                            | p.Gly89Glu   |
| 23 | 70787374  | chrX:70787374  | A | G | 1 | 0.00056 | <i>OGT</i>      | missense variant                            | p.Val872Ile  |
| 23 | 77388925  | chrX:77388925  | G | C | 1 | 0.00056 | <i>TAF9B</i>    | missense variant                            | p.Val168Leu  |
| 23 | 100537441 | chrX:100537441 | A | T | 1 | 0.00057 | <i>TAF7L</i>    | missense variant &<br>splice region variant | p.Met180Leu  |
| 23 | 101912859 | chrX:101912859 | T | G | 1 | 0.00057 | <i>GPRASP1</i>  | missense variant                            | p.Ala1340Ser |
| 23 | 101970975 | rs775866009    | T | C | 1 | 0.00056 | <i>GPRASP2</i>  | missense variant                            | p.Ala393Val  |
| 23 | 107316048 | chrX:107316048 | C | T | 1 | 0.00056 | <i>VSIG1</i>    | missense variant                            | p.Val221Ala  |
| 23 | 107433643 | rs200541162    | T | G | 1 | 0.00056 | <i>COL4A6</i>   | missense variant                            | p.Leu470Ile  |
| 23 | 107811862 | rs779822354    | T | C | 1 | 0.00056 | <i>COL4A5</i>   | missense variant                            | p.Pro94Ser   |
| 23 | 107976892 | chrX:107976892 | C | T | 1 | 0.00058 | <i>IRS4</i>     | missense variant                            | p.Ile895Val  |
| 23 | 114141252 | rs201583846    | C | T | 1 | 0.00056 | <i>HTR2C</i>    | missense variant                            | p.Trp186Arg  |
| 23 | 117895129 | chrX:117895129 | A | C | 1 | 0.00057 | <i>IL13RA1</i>  | missense variant                            | p.Asn235Lys  |
| 23 | 123515051 | rs774434990    | A | G | 1 | 0.00056 | <i>TENM1</i>    | missense variant                            | p.Arg2512Trp |
| 23 | 129171505 | rs368783964    | T | C | 1 | 0.00062 | <i>BCORL1</i>   | missense variant                            | p.Thr1564Met |
| 23 | 153699965 | rs781972979    | G | C | 1 | 0.00059 | <i>PLXNA3</i>   | missense variant                            | p.Thr1835Ser |
| 23 | 153774301 | chrX:153774301 | T | C | 1 | 0.00057 | <i>G6PD</i>     | missense variant                            | p.Asp24Asn   |
| 23 | 153944424 | rs147290916    | T | C | 1 | 0.00057 | <i>GAB3</i>     | missense variant                            | p.Val85Met   |
| 23 | 154009930 | chrX:154009930 | A | G | 1 | 0.00056 | <i>MPP1</i>     | missense variant                            | p.Thr365Ile  |

**Supplementary Table S12.** Clinical data for the five Swedish SLE patients carrying the *MUC5B* rs773068050 missense case-only allele.

|                                                           | SLE1                      | SLE2   | SLE3                                                                                                         | SLE4   | SLE5   |
|-----------------------------------------------------------|---------------------------|--------|--------------------------------------------------------------------------------------------------------------|--------|--------|
| Gender                                                    | Female                    | Female | Male                                                                                                         | Female | Female |
| Age at diagnosis                                          | 30                        | 43     | 50                                                                                                           | 27     | 48     |
| Age at follow-up                                          | 34                        | 77     | 50                                                                                                           | 33     | 64     |
| ≥4 ACR criteria (Tan et al., 1982; Hochberg et al., 1997) | YES                       | YES    | YES                                                                                                          | YES    | YES    |
| Number of ACR criteria fulfilled                          | 7                         | 4      | 7                                                                                                            | 4      | 5      |
| ACR criteria:                                             |                           |        |                                                                                                              |        |        |
| 1) Malar rash                                             | YES                       | YES    | NO                                                                                                           | NO     | NO     |
| 2) Discoid rash                                           | NO                        | NO     | NO                                                                                                           | NO     | NO     |
| 3) Photosensitivity                                       | YES                       | NO     | NO                                                                                                           | NO     | YES    |
| 4) Oral Ulcers                                            | NO                        | NO     | YES                                                                                                          | NO     | NO     |
| 5) Arthritis                                              | YES                       | YES    | YES                                                                                                          | YES    | YES    |
| 6) Serositis                                              | YES                       | NO     | YES                                                                                                          | NO     | YES    |
| 7) Renal disorder                                         | YES                       | YES    | YES                                                                                                          | NO     | NO     |
| Class*                                                    | IV                        | III    | V                                                                                                            | NA     | NA     |
| 8) Neurologic disorder                                    | NO                        | NO     | NO                                                                                                           | NO     | NO     |
| 9) Hematologic disorder                                   | NO                        | NO     | YES                                                                                                          | YES    | YES    |
| 10) Immunologic disorder                                  | YES                       | NO     | YES                                                                                                          | YES    | NO     |
| 11) Positive ANA                                          | YES                       | YES    | YES                                                                                                          | YES    | YES    |
| Autoantibodies:                                           |                           |        |                                                                                                              |        |        |
| Anti-DNA                                                  | YES                       | NO     | YES                                                                                                          | YES    | NO     |
| Anti-Sm                                                   | NO                        | NO     | YES                                                                                                          | NO     | NO     |
| Anti-RNP                                                  | NO                        | NO     | YES                                                                                                          | NA     | NA     |
| Anti-SSA                                                  | NO                        | NO     | YES                                                                                                          | NO     | YES    |
| Anti-SSB                                                  | NO                        | NO     | YES                                                                                                          | NO     | NO     |
| Anti-cardiolipin IgG                                      | NO                        | NO     | NO                                                                                                           | NO     | YES    |
| Anti-beta2-glycoprotein I IgG                             | YES                       | NO     | NO                                                                                                           | NO     | YES    |
| Rheumatoid factor (RF)                                    | NO                        | NO     | NO                                                                                                           | NA     | NA     |
| Lupus anticoagulant (LAC)                                 | NO                        | NO     | NO                                                                                                           | NA     | NA     |
| SLICC Damage Index (Gladman et al., 1996)                 | 1                         | 5      | 1                                                                                                            | 0      | 3      |
| Lung involvement:                                         |                           |        |                                                                                                              |        |        |
| Interstitial lung disease (ILD) clinical diagnosis        | NO                        | NO     | NO                                                                                                           | NO     | NO     |
| CT-scan performed                                         | NO                        | NO     | YES                                                                                                          | NO     | NO     |
| Chest x-ray performed                                     | YES, several (lung x-ray) | YES    | YES                                                                                                          | YES    | YES    |
| Other lung disease/symptoms                               | Relapsing pleuritis       | Asthma | Pleuritis previously;<br>breathlessness currently;<br>emphysema (lower lobes);<br>air trapping (upper lobes) | NO     | NO     |

ACR: the American College of Rheumatology

SLICC: The Systemic Lupus Erythematosus International Collaborating Clinics

NA: not available

\*Biopsies were classified according to the WHO or the ISN/RPS 2003 classification systems
